# Supplementary material
Source: publisher figshare collection journal article supplement (https://tandf.figshare.com/articles/dataset/_/22018980)
Supplement: Supplementary file 1 [file 39085674]

## **SUPPLEMENTARY APPENDIX**

### **Disease activity-guided tapering of biologics in patients with inflammatory arthritis:**

*A pragmatic, randomised, open-label, equivalence trial*

Line Uhrenholt, Robin Christensen, Lene Dreyer, Ellen-Margrethe Hauge, Annette Schlemmer, Anne Gitte Loft, Mads NB Rasch, Hans Christian Horn, Katrine H Gade, René D Østgård, Peter C Taylor, Kirsten Duch, and Salome Kristensen

## **CONTENT**

|                                                                                                                                                                                                                                                         |            |
|---------------------------------------------------------------------------------------------------------------------------------------------------------------------------------------------------------------------------------------------------------|------------|
| <b>SUPPLEMENTARY DATA.....</b>                                                                                                                                                                                                                          | <b>S3</b>  |
| <b>Supplementary Data S1.</b> Important modifications to the BIODOPT trial protocol during the study period with dates of report to the relevant authorities.....                                                                                       | <b>S3</b>  |
| <b>Supplementary Data S2:</b> Information on randomisation and allocation.....                                                                                                                                                                          | <b>S4</b>  |
| <b>Supplementary Data S3:</b> Power and sample size considerations.....                                                                                                                                                                                 | <b>S5</b>  |
| <b>SUPPLEMENTARY TABLES.....</b>                                                                                                                                                                                                                        | <b>S6</b>  |
| <b>Supplementary Table S1.</b> Baseline demographics and disease characteristics by diagnosis.....                                                                                                                                                      | <b>S6</b>  |
| <b>Supplementary Table S2.</b> Baseline demographics and disease characteristics analysed by biologic mode of action based on the ITT population.....                                                                                                   | <b>S7</b>  |
| <b>Supplementary Table S3.</b> Disease specific outcomes at 18 months follow-up analysed “as observed” based on the ITT population.....                                                                                                                 | <b>S8</b>  |
| <b>Supplementary Table S4.</b> Comparison between groups at 18 months based on the ITT population using non-responder imputation (Baseline Observation Carried Forward).....                                                                            | <b>S9</b>  |
| <b>Supplementary Table S5.</b> Comparison between groups at 18 months based on the per protocol population (i.e. no missing data).....                                                                                                                  | <b>S10</b> |
| <b>Supplementary Table S6.</b> Sub-group analyses on the primary efficacy endpoint ‘ $\geq 50\%$ biologic dose reduction’ i.e. patients receiving $\geq 50\%$ reduced biologic dose at 18 months analysed “as observed” based on the ITT population.... | <b>S11</b> |
| <b>Supplementary Table S7.</b> Sub-group analyses on the primary efficacy endpoint ‘disease activity’ i.e. disease activity at 18 months analysed “as observed” based on the ITT population.....                                                        | <b>S12</b> |
| <b>SUPPLEMENTARY FIGURES.....</b>                                                                                                                                                                                                                       | <b>S13</b> |
| <b>Supplementary Figure S1.</b> Overview of the disease activity-guided tapering algorithm applied for patients in the tapering group during the BIODOPT trial.....                                                                                     | <b>S13</b> |
| <b>Supplementary Figure S2.</b> Spaghetti plots of disease activity during the study period in each trial group reported by diagnosis.....                                                                                                              | <b>S14</b> |

**Supplementary Data S1:** Important modifications to the BIODOPT trial protocol during the study period with dates of report to the relevant authorities.

| <b>Amendment number</b> | <b>Amendment date</b>              | <b>Description of amendment</b>                                                                                                                                                                                                                                                                                                                                                                                                                                                                                                                                                                        |
|-------------------------|------------------------------------|--------------------------------------------------------------------------------------------------------------------------------------------------------------------------------------------------------------------------------------------------------------------------------------------------------------------------------------------------------------------------------------------------------------------------------------------------------------------------------------------------------------------------------------------------------------------------------------------------------|
| 1                       | June 12 <sup>th</sup><br>2018      | The Department of Rheumatology, South West Jutland, Esbjerg, was added as study site (but the site never included any patients)                                                                                                                                                                                                                                                                                                                                                                                                                                                                        |
| 2                       | September 24 <sup>th</sup><br>2018 | The biosimilar drugs Imraldi and Amgevita (adalimumab) was added as approved study drugs as all patients treated with adalimumab per national guideline had to switch to biosimilar adalimumab in the form of Imraldi or Amgevita.                                                                                                                                                                                                                                                                                                                                                                     |
| 3                       | March 8 <sup>th</sup><br>2019      | The biosimilar drug Zessly (infliximab) was added as approved study drug as all patients treated with infliximab per national guideline had to switch to biosimilar infliximab in the form of Zessly. Moreover, the eligibility criteria was revised to allow inclusion of patients in sustained LDA during $\geq 12$ months.                                                                                                                                                                                                                                                                          |
| 4                       | September 5 <sup>th</sup><br>2019  | The Department of Rheumatology, Silkeborg Regional Hospital, was added as study site                                                                                                                                                                                                                                                                                                                                                                                                                                                                                                                   |
| 5                       | November 30 <sup>th</sup><br>2020  | The biosimilar drugs Erelzi (etanercept) and Hyrimoz (adalimumab) was added as approved study drugs as all patients treated with etanercept or adalimumab per national guideline had to switch to biosimilar Erelzi or Hyrimoz, respectively.                                                                                                                                                                                                                                                                                                                                                          |
| 6                       | March 20 <sup>th</sup><br>2020     | Suspension of patient enrolment due to the national implication of the COVID-19 pandemic to the Danish health care system. Moreover, remote monitoring by telephone contact was allowed for the following visits: month 4, month 8, month 12, and month 24. The primary endpoint assessment (visit 18 month) was considered to be essential to the patients and the trial; therefore, the visit was conducted as an outpatient consultation. Similarly, subacute visits due to symptoms of flare were also considered to be essential; thus, encouraged to be conducted as an outpatient consultation. |
| 7                       | April 2 <sup>nd</sup><br>2020      | The inclusion period was closed 1 month before scheduled due to the continued national COVID-19 implication to the Danish health care system.                                                                                                                                                                                                                                                                                                                                                                                                                                                          |
| 8                       | June 12 <sup>th</sup><br>2020      | Remote monitoring, due to the implication of the COVID-19 pandemic, was lifted; thus, all trial visits were onwards conducted as an outpatient consultation in accordance with the trial protocol.                                                                                                                                                                                                                                                                                                                                                                                                     |

## Supplementary Data S2: Information on randomisation and allocation.

A computer-generated allocation sequence was created in SAS PROC PLAN by senior biostatistician Robin Christensen (RC) who had no clinical involvement in the trial. Patients were allocated in permuted blocks of three to six stratified by trial site (Aalborg, Aarhus, Odense, or Silkeborg), diagnosis (RA, PsA, or axSpA) and biologic failure history (currently on biologic number  $\leq 2$ , or  $\geq 3$ ). The allocation sequence was only accessible to RC and the independent data manager Johanne Hovgaard Winther (JHW). JHW entered the sequence into a dedicated electronic case report form (e-CRF) in Research Electronic Data Capture (REDCap). A randomisation ratio of 2:1 (tapering:control) was chosen to gain more data on the tapering group for exploratory sub-analyses; however, as discussed in the manuscript the trial is not powered for the sub-analyses. The unequal randomisation ratio with more patients allocated to the tapering group exposes a larger proportion of patients to the risk of flare. However, the potential harm is considered acceptable as previous studies have demonstrated that a tapering strategy can reduce the biological dose considerably without persistent deterioration in disease activity as flares are managed with biologic dose escalation for the majority of patients (1-11). Moreover, patients in the tapering group were suspected to potentially have the benefit of a dose-dependent lower risk of adverse events including serious infections (12). In REDCap, the patient was randomised when the physician clicked on the 'randomisation button' and the assigned intervention appeared on the computer screen.

## References

1. Verhoeve L, et al. Down-titration and discontinuation strategies of tumour necrosis factor-blocking agents for rheumatoid arthritis in patients with low disease activity. *Cochrane Database Syst Rev* 2019;5:CD010455.
2. Uhrenholt L, et al. Risk of flare after tapering or withdrawal of b-/tsDMARDs in patients with RA or axSpA: A systematic review and meta-analysis. *Rheumatology (Oxford)* 2022;61:3107-3122.
3. Michielsens CAJ, et al. Treat-to-target dose reduction and withdrawal strategy of TNF inhibitors in psoriatic arthritis and axial spondyloarthritis : A randomised controlled non-inferiority trial. *Ann Rheum Dis* 2022;doi:10.1136.
4. Ruwaard J, et al. Interval prolongation of etanercept in rheumatoid arthritis, ankylosing spondylitis, and psoriatic arthritis: a randomized controlled trial. *Scand J Rheumatol* 2022; doi: 10.1080/03009742.2022.2028364.
5. Bertrand D, et al. Tapering of Etanercept is feasible in patients with Rheumatoid Arthritis in sustained remission: a pragmatic randomized controlled trial. *Scand J Rheumatol* 2022;doi: 10.1080/03009742.2021.1955467.
6. van Herwaarden N, et al. Disease activity guided dose reduction and withdrawal of adalimumab or etanercept compared with usual care in rheumatoid arthritis: open label, randomised controlled, non-inferiority trial. *BMJ* 2015;350:h1389.
7. Fautrel B, et al. Step-down strategy of spacing TNF-blocker injections for established rheumatoid arthritis in remission: results of the multicentre non-inferiority randomised open-label controlled trial. *Ann Rheum Dis* 2016;75:59–67.
8. Brahe CH, et al. Dose tapering and discontinuation of biological therapy in rheumatoid arthritis patients in routine care - 2-year outcomes and predictors. *Rheumatology (Oxford)* 2019;58(1):110–9.
9. Wetterslev M, et al. Tapering of TNF inhibitors in axial spondyloarthritis in routine care — 2-year clinical and MRI outcomes and predictors of successful tapering. *Rheumatology (Oxford)* 2022;61:2398-2412.
10. Navarro-Compán V, et al. Anti-TNF discontinuation and tapering strategies in patients with axial spondyloarthritis: A systematic literature review. *Rheumatology (Oxford)* 2016;55:1188–94.
11. Ye W, et al. Tapering and Discontinuation of Biologics in Patients with Psoriatic Arthritis with Low Disease Activity. *Drugs* 2018;78:1705–15.
12. Singh JA, et al. Risk of serious infection in biological treatment of patients with rheumatoid arthritis: a systematic review and meta-analysis. *Lancet* 2015;386:258–65.



### **Supplementary Data S3: Power and sample size considerations.**

The sample size calculation was based on the primary efficacy endpoint ‘disease activity’ and a requirement of minimum 85% power. A clinically relevant reduction in Disease Activity Score<sub>28-C-Reactive Protein</sub> (DAS<sub>28-CRP</sub>) is acknowledged to be  $\Delta\text{DAS}_{28\text{-CRP}} > 1.2$  (1) and in Ankylosing Spondylitis Disease Activity Score (ASDAS) to be  $\Delta\text{ASDAS} > 1.1$  (2). A clinically unimportant change in disease activity was defined as ‘less than half of the effect’ that is considered a clinically relevant disease activity reduction; thus, the equivalence margin was prespecified to be  $\pm 0.5$  disease activity points. Furthermore, the equivalence margins of  $\pm 0.5$  was ‘less than half of the effect’ that is considered a clinically relevant flare in DAS<sub>28-CRP</sub>, i.e.,  $\Delta\text{DAS}_{28\text{-CRP}} > 1.2$  (3), and fairly equal to half of the effect that is considered a clinically flare in ASDAS, i.e.,  $\Delta\text{ASDAS} \geq 0.9$  (4).

With an alpha level of 0.05 using two one-sided tests (one-sided alpha of 0.025) and equivalence margins of  $\pm 0.5$  disease activity points, assuming a mean difference of 0 and a common SD of 1.0 points, a total sample size of 156 participants would correspond to a statistical power of 80%. From this, it was decided to aim for a total sample size of 180 participants corresponding to an approximate power of 87%.

For the other primary endpoint, a sample size of 180 patients would yield a high statistical power of 99% when assuming that 30% and 5% of the patients (tapering vs continuation, respectively) would achieve  $\geq 50\%$  reduction in biologic dose compared to baseline. Additional power and sample size considerations have previously been described in details (5).

### **References**

1. Fransen J, et al. The Disease Activity Score and the EULAR response criteria. *Clin Exp Rheumatol* 2005;23:93–9.
2. Machado P, et al. Ankylosing Spondylitis Disease Activity Score (ASDAS): Defining cut-off values for disease activity states and improvement scores. *Ann Rheum Dis* 2011;70:47–53.
3. van der Maas A et al. Construct and criterion validity of several proposed DAS<sub>28</sub>-based rheumatoid arthritis flare criteria: an OMERACT cohort validation study. *Ann Rheum Dis* 2013;72:1800–5.
4. Molto A et al. An assessment in spondyloarthritis international society (ASAS)-endorsed definition of clinically important worsening in axial spondyloarthritis based on ASDAS. *Ann Rheum Dis* 2018;77:124–7.
5. Uhrenholt L, et al. Dosage reduction and discontinuation of biological disease-modifying antirheumatic drugs in patients with rheumatoid arthritis, psoriatic arthritis and axial spondyloarthritis: Protocol for a pragmatic, randomised controlled trial (the BIOlogical Dose OPTimisation (BIODOPT) trial). *BMJ Open* 2019;9:e028517.

**Supplementary Table S1:** Baseline demographics and disease characteristics by diagnosis analysed “as observed” based on the ITT population.

| Variable                                                    | Tapering group<br>N = 95 | Control group<br>N = 47 |
|-------------------------------------------------------------|--------------------------|-------------------------|
| <b>Rheumatoid arthritis</b>                                 | <b>N = 41</b>            | <b>N = 20</b>           |
| Female, n (%)                                               | 34 (83%)                 | 14 (70%)                |
| Age (years), mean (SD)                                      | 61.9 (11.6)              | 65.9 (7.8)              |
| Disease duration (years), median (IQR)                      | 16.3 (9.7;21.0)          | 16.8 (11.9;22.9)        |
| Rheumatoid factor positive, n (%)                           | 26 (63%)                 | 16 (80%)                |
| Anti-Citrullinated Peptide Antibody positive, n (%)         | 28 (68%)                 | 17 (85%)                |
| Erosive, n (%)                                              | 34 (83%)                 | 19 (95%)                |
| Concomitant methotrexate, n (%) <sup>1</sup>                | 26 (63%)                 | 14 (70%)                |
| HAQ-DI (0-3), median (IQR)                                  | 0.50 (0.00;0.88)         | 0.56 (0.13;1.22)        |
| Pain VAS (0-100), median (IQR)                              | 13.0 (6.0;22.0)          | 17.5 (4.8;35.8)         |
| Patient Global Health VAS (0-100), median (IQR)             | 13.0 (3.0;30.0)          | 18.5 (5.8;42.0)         |
| Tender joint count (0-68), median (IQR)                     | 0.0 (0.0;0.0)            | 0.0 (0.0;0.0)           |
| CRP (mg/L), median (IQR)                                    | 2.3 (0.9;3.9)            | 1.7 (0.6;3.9)           |
| Physician Global Health VAS (0-100), median (IQR)           | 0.0 (0.0;0.0)            | 0.0 (0.0;0.0)           |
| DAS28-CRP (0.96-9.4), mean (SD)                             | 1.7 (0.4)                | 1.8 (0.5)               |
| CDAI (0-76), median (IQR)                                   | 1.3 (0.7;2.4)            | 1.9 (0.5;3.8)           |
| SDAI (0-86), median (IQR)                                   | 1.9 (0.7;3.6)            | 2.2 (0.7;4.8)           |
| <b>Psoriatic arthritis</b>                                  | <b>N = 18</b>            | <b>N = 8</b>            |
| Female, n (%)                                               | 7 (39%)                  | 3 (38%)                 |
| Age (years), mean (SD)                                      | 48.1 (11.8)              | 46.1 (13.4)             |
| Disease duration (years), median (IQR)                      | 13.4 (6.4;20.0)          | 11.1 (4.5;25.1)         |
| Concomitant methotrexate, n (%) <sup>1</sup>                | 10 (56%)                 | 4 (50%)                 |
| HAQ-DI (0-3), median (IQR)                                  | 0.13 (0.00;0.50)         | 0.31 (0.00;0.39)        |
| Pain VAS (0-100), median (IQR)                              | 9.5 (1.8;23.8)           | 14.5 (8.0;19.0)         |
| Patient Global Health VAS (0-100), median (IQR)             | 16.0 (1.0;36.5)          | 15.0 (6.5;26.8)         |
| Tender joint count (0-68), median (IQR)                     | 0.0 (0.0;0.0)            | 0.0 (0.0;0.0)           |
| SPARCC Enthesitis Index (0-16), median (IQR)                | 0.0 (0.0;0.0)            | 0.0 (0.0;0.0)           |
| Dactylitis by number (0-20), median (IQR)                   | 0.0 (0.0;0.0)            | 0.0 (0.0;0.0)           |
| PASI (0-72), median (IQR)                                   | 0.0 (0.0;1.1)            | 0.3 (0.0;0.4)           |
| mNAPSI (0-130), median (IQR)                                | 0.0 (0.0;0.0)            | 0.0 (0.0;0.8)           |
| CRP (mg/L), median (IQR)                                    | 1.3 (0.5;3.6)            | 0.7 (0.5;4.7)           |
| Physician Global Health VAS (0-100), median (IQR)           | 0.0 (0.0;0.0)            | 0.0 (0.0;0.8)           |
| DAS28-CRP (0.96-9.4), mean (SD)                             | 1.7 (0.3)                | 1.6 (0.5)               |
| DAPSA (0-164), median (IQR)                                 | 2.8 (1.1;6.3)            | 2.7 (1.8;7.1)           |
| In MDA, n (%)                                               | 14 (78%)                 | 6 (75%)                 |
| <b>Axial spondyloarthritis</b>                              | <b>N = 36</b>            | <b>N = 19</b>           |
| Female, n (%)                                               | 11 (31%)                 | 3 (16%)                 |
| Age (years), mean (SD)                                      | 42.5 (14.3)              | 40.6 (12.1)             |
| Disease duration (years), median (IQR)                      | 7.3 (4.2;10.9)           | 6.8 (4.3;14.3)          |
| Ankylosing spondylitis, n (%)                               | 23 (64%)                 | 14 (74%)                |
| HLA-B27 positive, n (%)                                     | 32 (89%)                 | 15 (88%) <sup>2</sup>   |
| Concomitant NSAIDs, n (%)                                   | 7 (19%)                  | 3 (16%)                 |
| HAQ-DI (0-3), median (IQR)                                  | 0.00 (0.00;0.13)         | 0.00 (0.00;0.13)        |
| Pain VAS (0-100), median (IQR)                              | 3.5 (1.0;13.0)           | 7.0 (3.0;12.0)          |
| Patient Global Health VAS (0-100), median (IQR)             | 4.5 (0.3;10.8)           | 10.0 (5.0;24.0)         |
| Backpain <sup>3</sup> (0-100), median (IQR)                 | 7.5 (2.0;17.0)           | 10.0 (4.0;15.0)         |
| Morning stiffness <sup>4</sup> (0-100), median (IQR)        | 7.5 (1.0;16.0)           | 4.0 (1.0;14.0)          |
| Peripheral pain/swelling <sup>5</sup> (0-100), median (IQR) | 4.0 (0.3;11.0)           | 2.0 (0.0;15.0)          |
| Tender joint count (0-68), median (IQR)                     | 0.0 (0.0;0.0)            | 0.0 (0.0;0.0)           |
| SPARCC Enthesitis Index (0-16), median (IQR)                | 0.0 (0.0;0.0)            | 0.0 (0.0;0.0)           |
| Dactylitis by number (0-20), median (IQR)                   | 0.0 (0.0;0.0)            | 0.0 (0.0;0.0)           |
| PASI (0-72), median (IQR)                                   | 0.0 (0.0;0.0)            | 0.0 (0.0;0.0)           |
| mNAPSI (0-130), median (IQR)                                | 0.0 (0.0;0.0)            | 0.0 (0.0;0.0)           |
| CRP (mg/L), median (IQR)                                    | 3.8 (1.4;4.0)            | 3.7 (1.0;3.9)           |
| Physician Global Health VAS (0-100), median (IQR)           | 0.0 (0.0;1.0)            | 0.0 (0.0;1.0)           |
| ASDAS (0.6-∞), mean (SD)                                    | 1.1 (0.4)                | 1.2 (0.3)               |
| BASDAI (0-100), median (IQR)                                | 8.5 (2.3;13.8)           | 11.0 (5.0;21.0)         |

N: number, SD: standard deviation, IQR: interquartile range, HAQ-DI: Health Assessment Questionnaire Disability Index, VAS: Visual Analog Scale, CRP: C-Reactive Protein, mg: milligram, L: litre, DAS28-CRP: Disease Activity Score 28-C-Reactive Protein, CDAI: Clinical Disease Activity Index, SDAI: Simplified Disease Activity Index, SPARCC: Spondyloarthritis Research Consortium of Canada, PASI: Psoriasis Area Severity Index, mNAPSI: modified Nail Psoriasis Severity Index, DAPSA: Disease Activity index for Psoriatic Arthritis, MDA: Minimal Disease Activity in PsA, HLA-B27: Human leukocyte antigen subtype B27, NSAIDs: Non-steroidal anti-inflammatory drugs, ASDAS: Ankylosing Spondylitis Disease Activity Score, BASDAI: Bath Ankylosing Spondylitis Disease Activity Index.

<sup>1</sup>: RA, median MTX dose (IQR): 15.0 mg/week (10.0;5.0). PsA, median MTX dose (IQR): 13.8 mg/week (10.0;15.0). <sup>2</sup>: 2 missing values. <sup>3</sup>: BASDAI question 2. <sup>4</sup>: BASDAI question 5. <sup>5</sup>: BASDAI question 3

**Supplementary Table S2:** Baseline demographics and disease characteristics analysed by biologic mode of action based on the ITT population.

| Variable                                             | <i>TNFi treated, n = 129</i>  | <i>Non-TNFi treated, n =13</i> |
|------------------------------------------------------|-------------------------------|--------------------------------|
| <b>General characteristics</b>                       |                               |                                |
| Female, n (%)                                        | 61 (47%)                      | 11 (85%)                       |
| Age (years), mean (SD)                               | 50.5 (1.3)                    | 67.5 (2.9)                     |
| Smoking, n (%)                                       | 20(16%)                       | 4 (31%)                        |
| Body Mass Index (kg/m <sup>2</sup> ), median (IQR)   | 25.6 (23.3;29.3)              | 27.4 (22.2;29.8)               |
| <b>Arthritis characteristics</b>                     |                               |                                |
| Diagnosis:                                           |                               |                                |
| RA, n (%)                                            | 48 (37%)                      | 13 (100%)                      |
| PsA, n (%)                                           | 26 (20%)                      | 0 (0%)                         |
| AxSpA, n (%)                                         | 55 (43%)                      | 0 (0%)                         |
| Disease duration (years), median (IQR)               | 11.9 (6.1;18.3)               | 13.3 (9.3;19.4)                |
| <b>Disease activity measures</b>                     |                               |                                |
| HAQ-DI (0.0-3.0), median (IQR)                       | 0.13 (0.00;0.50)              | 0.63 (0.13;1.69)               |
| Pain VAS (0-100 mm), median (IQR)                    | 10.0 (3.0;17.5)               | 14.0 (5.5;31.0)                |
| Fatigue VAS (0-100 mm), median (IQR)                 | 19.0 (6.0;34.5)               | 29.0 (9.0;63.5)                |
| Patient global health VAS (0-100 mm), median (IQR)   | 11.0 (3.0;22.5)               | 16.0 (4.0;39.5)                |
| Short Form-36:                                       |                               |                                |
| Physical component summary (0-100), median (IQR)     | 51.2 (46.9;54.9) <sup>1</sup> | 46.9 (39.2;51.7)               |
| Mental component summary (0-100), median (IQR)       | 55.4 (47.4;59.5) <sup>1</sup> | 54.9 (49.1;59.8)               |
| Tender joint count (0-68), median (IQR)              | 0.0 (0.0;0.0)                 | 0.0 (0.0;1.0)                  |
| Swollen joint count (0-66), median (IQR)             | 0.0 (0.0;0.0)                 | 0.0 (0.0;0.0)                  |
| CRP (mg/L), median (IQR)                             | 2.8 (0.8;3.9)                 | 1.0 (0.5;2.5)                  |
| Physician global health VAS (0-100 mm), median (IQR) | 0.0 (0.0;0.0)                 | 0.0 (0.0;0.0)                  |
| Disease activity score <sup>2</sup> , mean (SD)      | 1.46 (0.04)                   | 1.68 (0.15)                    |
| In remission <sup>3</sup> , n (%)                    | 109 (85%)                     | 13 (100%)                      |
| <b>Arthritis treatment characteristics</b>           |                               |                                |
| csDMARDs, n (%)                                      | 57 (44%)                      | 6 (46%)                        |
| Combination csDMARDs, n (%)                          | 3 (2%)                        | 1 (8%)                         |
| MTX, n (%)                                           | 38 (43%)                      | 2 (29%)                        |
| Duration of baseline bDMARD (years), median (IQR)    | 4.9 (2.3;9.2)                 | 4.8 (2.7;6.1)                  |
| Baseline bDMARD therapy:                             |                               |                                |
| TNF- $\alpha$ inhibitor, n (%)                       | 129 (100%)                    | 0 (0%)                         |
| IL-6 inhibitor, n (%)                                | 0 (0%)                        | 9 (69%)                        |
| T-cell co-stimulation blocker, n (%)                 | 0 (0%)                        | 4 (31%)                        |
| Repeated bDMARD failure <sup>4</sup> , n (%)         | 4 (3%)                        | 5 (38%)                        |

N: number, SD: standard deviation, kg: kilogram, m<sup>2</sup>: square metre, IQR: interquartile range, RA: rheumatoid arthritis, PsA: psoriatic arthritis, axSpA: axial spondyloarthritis, HAQ-DI: Health Assessment Questionnaire Disability Index, VAS: Visual Analog Scale, CRP: C-reactive protein, mg: milligram, L:litre, csDMARDs: Conventional synthetic disease-modifying antirheumatic drugs, MTX: methotrexate, bDMARD: biologic disease-modifying antirheumatic drug, TNF: Tumour necrosis factor, IL: Interleukin.

<sup>1</sup>: Missing values: one value for SF-36 PCS and for SF-36 MCS.

<sup>2</sup>: RA and PsA: Disease Activity Score (DAS)28-CRP and axSpA: Ankylosing Spondylitis Disease Activity Score (ASDAS).

<sup>3</sup>: RA and PsA: DAS28-CRP <2.6 and axSpA: ASDAS <1.3.

**Supplementary Table S3:** Disease specific outcomes at 18 months follow-up analysed “as observed” based on the ITT population.

| Outcome                                       | Tapering group, N = 88 |        |              | Control group, N = 46 |        |              |
|-----------------------------------------------|------------------------|--------|--------------|-----------------------|--------|--------------|
|                                               | N                      | Median | IQR          | N                     | Median | IQR          |
| <b>Rheumatoid arthritis</b>                   |                        |        |              |                       |        |              |
|                                               | N = 41                 |        |              | N = 19                |        |              |
| Biologics reduced by $\geq 50\%^1$ , N/n (%)  | 41/14                  | 34%    | 20% to 49%   | 19/1                  | 5%     | -5% to 15%   |
| HAQ-DI (0-3)                                  | 40                     | 0.50   | 0.03 to 0.88 | 19                    | 0.50   | 0.25 to 1.25 |
| Pain VAS (0-100)                              | 41                     | 19.0   | 5.5 to 28.5  | 19                    | 27.0   | 7.0 to 35.0  |
| Patient Global Health VAS (0-100)             | 41                     | 17.0   | 3.0 to 27.0  | 19                    | 25.0   | 6.0 to 37.0  |
| Tender joint count (0-68)                     | 41                     | 0.0    | 0.0 to 1.0   | 19                    | 0.0    | 0.0 to 1.0   |
| Swollen joint count (0-66)                    | 41                     | 0.0    | 0.0 to 0.0   | 19                    | 0.0    | 0.0 to 0.0   |
| Physician Global Health VAS (0-100)           | 41                     | 0.0    | 0.0 to 1.0   | 19                    | 0.0    | 0.0 to 6.0   |
| CRP (mg/L)                                    | 41                     | 3.9    | 1.1 to 6.5   | 19                    | 2.1    | 1.0 to 3.9   |
| DAS28crp (0.96-9.4)                           | 41                     | 1.8    | 1.5 to 2.3   | 19                    | 2.0    | 1.7 to 2.5   |
| CDAI (0-76)                                   | 41                     | 2.3    | 0.7 to 4.7   | 19                    | 3.5    | 1.1 to 5.8   |
| SDAI (0-86)                                   | 41                     | 2.8    | 1.3 to 5.7   | 19                    | 3.8    | 1.3 to 6.3   |
| <b>Psoriatic arthritis</b>                    |                        |        |              |                       |        |              |
|                                               | N = 14                 |        |              | N = 8                 |        |              |
| Biologics reduced by $\geq 50\%^1$ , N/n (%)  | 14/5                   | 36%    | 11% to 61%   | 8/0                   | 0%     | ..           |
| HAQ-DI (0-3)                                  | 14                     | 0.00   | 0.00 to 0.28 | 8                     | 0.06   | 0.0 to 0.25  |
| Pain VAS (0-100)                              | 14                     | 17.0   | 10.3 to 25.0 | 8                     | 12.5   | 4.0 to 18.3  |
| Patient Global Health VAS (0-100)             | 14                     | 12.0   | 6.5 to 26.5  | 8                     | 15.5   | 0.0 to 26.5  |
| Tender joint count (0-68)                     | 14                     | 0.0    | 0.0 to 0.0   | 8                     | 0.0    | 0.0 to 0.0   |
| Swollen joint count (0-66)                    | 14                     | 0.0    | 0.0 to 0.0   | 8                     | 0.0    | 0.0 to 0.0   |
| SPARCC Enthesitis Index (0-16)                | 13                     | 0.0    | 0.0 to 0.0   | 8                     | 0.0    | 0.0 to 0.0   |
| Dactylitis by number (0-20)                   | 13                     | 0.0    | 0.0 to 0.0   | 8                     | 0.0    | 0.0 to 0.0   |
| PASI (0-72)                                   | 13                     | 0.0    | 0.0 to 0.2   | 8                     | 0.0    | 0.0 to 0.4   |
| mNAPSI (0-130)                                | 13                     | 0.0    | 0.0 to 0.0   | 8                     | 0.0    | 0.0 to 0.0   |
| Physician Global Health VAS (0-100)           | 14                     | 0.0    | 0.0 to 3.5   | 8                     | 0.0    | 0.0 to 0.0   |
| CRP (mg/L)                                    | 14                     | 0.9    | 0.6 to 2.9   | 8                     | 2.3    | 0.5 to 5.4   |
| DAS28crp (0.96-9.4)                           | 14                     | 1.4    | 1.3 to 1.8   | 8                     | 1.6    | 1.3 to 1.8   |
| DAPSA (0-164)                                 | 14                     | 3.2    | 2.2 to 5.5   | 8                     | 3.1    | 0.9 to 4.6   |
| In MDA, N/n (%)                               | 14                     | 12     | 86%          | 8                     | 8      | 100%         |
| <b>Axial spondyloarthritis</b>                |                        |        |              |                       |        |              |
|                                               | N = 33                 |        |              | N = 19                |        |              |
| Biologics reduced by $\geq 50\%^1$ , N/n (%)  | 33/16                  | 48%    | 31% to 66%   | 19/0                  | 0%     | ..           |
| HAQ-DI (0-3)                                  | 33                     | 0.00   | 0.00 to 0.25 | 17                    | 0.00   | 0.00 to 0.31 |
| Pain VAS (0-100)                              | 33                     | 12.0   | 1.0 to 26.0  | 17                    | 9.0    | 2.5 to 14.5  |
| Patient Global Health VAS (0-100)             | 33                     | 13.0   | 3.0 to 30.0  | 17                    | 12.0   | 5.5 to 28.5  |
| Backpain <sup>2</sup> (0-100)                 | 33                     | 15.0   | 2.0 to 28.5  | 17                    | 6.0    | 1.0 to 14.0  |
| Morning stiffness <sup>3</sup> (0-100)        | 33                     | 9.0    | 1.0 to 23.5  | 17                    | 10.0   | 1.5 to 19.5  |
| Peripheral pain/swelling <sup>4</sup> (0-100) | 33                     | 3.0    | 0.0 to 6.5   | 17                    | 4.0    | 0.5 to 24.5  |
| Tender joint count (0-68)                     | 33                     | 0.0    | 0.0 to 0.0   | 19                    | 0.0    | 0.0 to 0.0   |
| Swollen joint count (0-66)                    | 33                     | 0.0    | 0.0 to 0.0   | 19                    | 0.0    | 0.0 to 0.0   |
| SPARCC Enthesitis Index (0-16)                | 33                     | 0.0    | 0.0 to 0.0   | 19                    | 0.0    | 0.0 to 0.0   |
| Dactylitis by number (0-20)                   | 33                     | 0.0    | 0.0 to 0.0   | 19                    | 0.0    | 0.0 to 0.0   |
| PASI (0-72)                                   | 33                     | 0.0    | 0.0 to 0.0   | 19                    | 0.0    | 0.0 to 0.0   |
| mNAPSI (0-130)                                | 33                     | 0.0    | 0.0 to 0.0   | 19                    | 0.0    | 0.0 to 0.0   |
| Physician Global Health VAS (0-100)           | 33                     | 0.0    | 0.0 to 3.5   | 17                    | 0.0    | 0.0 to 0.5   |
| CRP (mg/L)                                    | 33                     | 3.9    | 1.7 to 5.3   | 19                    | 3.9    | 1.8 to 3.9   |
| ASDAS (0.6- $\infty$ )                        | 33                     | 1.2    | 1.0 to 1.8   | 17                    | 1.2    | 1.0 to 1.4   |
| BASDAI (0-100)                                | 33                     | 11.0   | 1.0 to 21.5  | 17                    | 12.0   | 5.0 to 16.0  |

N: number, IQR: interquartile range, HAQ-DI: Health Assessment Questionnaire Disability Index, VAS: Visual Analog Scale, CRP: C-Reactive Protein, mg: milligram, L: litre, DAS28crp: Disease Activity Score 28crp, CDAI: Clinical Disease Activity Index, SDAI: Simplified Disease Activity Index, SPARCC: Spondyloarthritis Research Consortium of Canada, PASI: Psoriasis Area Severity Index, mNAPSI: modified Nail Psoriasis Severity Index, DAPSA: Disease Activity index for Psoriatic Arthritis, MDA: Minimal Disease Activity in PsA, BASDAI: Bath Ankylosing Spondylitis Disease Activity Index, ASDAS: Ankylosing Spondylitis Disease Activity Score. <sup>1</sup>: Compared to baseline biologic dose and analysed as percentage with 95%CI, <sup>2</sup>: BASDAI question 2, <sup>3</sup>: BASDAI question 5, <sup>4</sup>: BASDAI question 3.

**Supplementary Table S4:** Comparison between groups at 18 months based on the ITT population using non-responder imputation (Baseline Observation Carried Forward) and multiple imputation.

| Outcome                                               | Tapering group<br>N = 95 | Control group<br>N = 47 | Difference between groups<br>(95%CI) <sup>1</sup> |
|-------------------------------------------------------|--------------------------|-------------------------|---------------------------------------------------|
| <b>Primary outcome</b>                                |                          |                         |                                                   |
| Biologics reduced by $\geq 50\%$ <sup>2</sup> , n (%) | 38 (40%)                 | 1 (2%)                  | 0.38 (0.27 to 0.49)                               |
| Disease activity score <sup>3</sup>                   | 1.73 (0.12)              | 1.66 (0.14)             | 0.07 (-0.13 to 0.27)                              |
| <b>Key secondary outcomes</b>                         |                          |                         |                                                   |
| In remission <sup>4</sup> , n (%)                     | 67 (71%)                 | 35 (74%)                | -0.04 (-0.19 to 0.12)                             |
| In low disease activity <sup>5</sup> , n (%)          | 83 (87%)                 | 43 (91%)                | -0.04 (-0.15 to 0.06)                             |
| <b>Other secondary outcomes</b>                       |                          |                         |                                                   |
| $\Delta$ HAQ-DI (0-3)                                 | 0.04 (0.06)              | -0.02 (0.06)            | 0.06 (-0.02 to 0.14)                              |
| $\Delta$ Pain VAS (0-100)                             | 5.5 (2.7)                | 1.0 (3.0)               | 4.5 (0.1 to 8.9)                                  |
| $\Delta$ Fatigue VAS (0-100)                          | -1.8 (3.6)               | -2.9 (4.0)              | 1.1 (-4.5 to 6.7)                                 |
| $\Delta$ Patient Global Health VAS (0-100)            | 2.4 (3.2)                | 0.9 (3.5)               | 1.5 (-3.6 to 6.5)                                 |
| $\Delta$ Short Form-36 PCS (0-100)                    | -1.6 (1.2)               | -2.2 (1.3)              | 0.6 (-1.3 to 2.5)                                 |
| $\Delta$ Short Form-36 MCS (0-100)                    | -1.3 (1.5)               | -1.1 (1.7)              | -0.2 (-2.6 to 2.2)                                |
| $\Delta$ Physician Global Health VAS (0-100)          | 4.2 (1.6)                | 3.5 (1.8)               | 0.7 (-2.2 to 3.7)                                 |
| $\Delta$ Tender joint count (0-68)                    | -0.04 (0.4)              | 0.55 (0.4)              | -0.59 (-1.19 to 0.004)                            |
| $\Delta$ Swollen joint count (0-66)                   | 0.3 (0.2)                | 0.3 (0.2)               | -0.03 (-0.33 to 0.28)                             |
| $\Delta$ CRP (mg/L)                                   | 2.6 (1.2)                | 0.4 (1.3)               | 2.3 (0.1 to 4.4)                                  |

N: number, CI: confidence interval,  $\Delta$ : Change between 18 months and baseline, HAQ-DI: Health Assessment Questionnaire Disability Index, VAS: Visual Analog Scale, PCS: physical component summary, MCS: mental component summary, CRP: C-reactive protein, mg: milligram, L: litre.

Dichotomous outcomes were analysed as crude risk difference for the between group comparison using generalised linear models for binomial data; missing outcome values were handled using a worst, best, worst-best, best-worst, and as observed data sets. Continuous outcomes were analysed using repeated-measures linear mixed-effects models as least squares means with standard error; missing values were handled with non-responder imputation (Baseline Observation Carried Forward).

<sup>1</sup>: Analysed as tapering group – control group.

<sup>2</sup>: Compared to baseline biologic dose.

<sup>3</sup>: RA and PsA: Disease Activity Score (DAS)28-CRP, and axSpA: Ankylosing Spondylitis Disease Activity Score (ASDAS).

<sup>4</sup>: RA and PsA: DAS28-CRP  $< 2.6$  and axSpA: ASDAS  $< 1.3$ .

<sup>5</sup>: RA and PsA: DAS28-CRP  $\leq 3.2$  and axSpA: ASDAS  $< 2.1$ .

**Supplementary Table S5:** Comparison between groups at 18 months based on the *per protocol* population.

| Outcome                                                 | Tapering group<br>N = 82 | Control group<br>N = 43 | Difference between groups<br>(95%CI) <sup>1</sup> |
|---------------------------------------------------------|--------------------------|-------------------------|---------------------------------------------------|
| <b>Primary outcome</b>                                  |                          |                         |                                                   |
| Biologics reduced by $\geq 50\%$ <sup>2</sup> , n/N (%) | 32/82 (39%)              | 1/43 (2%)               | 0.37 (0.25 to 0.48)                               |
| Disease activity score <sup>3</sup>                     | 1.79 (0.09)              | 1.75 (0.10)             | 0.04 (-0.15 to 0.23)                              |
| <b>Key secondary outcomes</b>                           |                          |                         |                                                   |
| In remission <sup>4</sup> , n/N (%)                     | 60/82 (73%)              | 31/41 (76%)             | -0.02 (-0.19 to 0.14)                             |
| In low disease activity <sup>5</sup> , n/N (%)          | 75/82 (91%)              | 38/41 (93%)             | -0.01 (-0.11 to 0.09)                             |
| <b>Other secondary outcomes</b>                         |                          |                         |                                                   |
| ΔHAQ-DI (0-3)                                           | 0.04 (0.04)              | -0.01 (0.05)            | 0.05 (-0.03 to 0.13)                              |
| ΔPain VAS (0-100)                                       | 7.7 (2.1)                | 3.8 (2.4)               | 3.8 (-0.7 to 8.4)                                 |
| ΔFatigue VAS (0-100)                                    | -0.9 (2.8)               | -1.2 (3.2)              | 0.3 (-5.4 to 6.0)                                 |
| ΔPatient Global Health VAS (0-100)                      | 4.7 (2.6)                | 3.4 (2.9)               | 1.3 (-3.9 to 6.6)                                 |
| ΔShort Form-36 PCS (0-100)                              | -2.3 (1.0)               | -2.5 (1.1)              | 0.3 (-1.8 to 2.3)                                 |
| ΔShort Form-36 MCS (0-100)                              | 0.5 (1.2)                | -0.4 (1.4)              | 0.9 (-1.7 to 3.4)                                 |
| ΔPhysician Global Health VAS (0-100)                    | 5.0 (1.1)                | 3.9 (1.4)               | 1.1 (-1.7 to 3.8)                                 |
| ΔTender joint count (0-68)                              | -0.1 (0.3)               | 0.6 (0.3)               | -0.7 (-1.3 to -0.1)                               |
| ΔSwollen joint count (0-66)                             | 0.3 (0.1)                | 0.3 (0.1)               | -0.03 (-0.32 to 0.26)                             |
| ΔCRP (mg/L)                                             | 3.2 (1.0)                | 0.7 (1.2)               | 2.5 (0.2 to 4.9)                                  |

N: number, CI: confidence interval, Δ: Change between 18 months and baseline, HAQ-DI: Health Assessment Questionnaire Disability Index, VAS: Visual Analog Scale, PCS: physical component summary, MCS: mental component summary, CRP: C-reactive protein, mg: milligram, L: litre.

The per-protocol population consisted of 88% (125/142) as 6% (8/142) were lost to follow up, 3% (5/142) discontinued their biological therapy due to an AE, 2% (3/142) switched biological therapy due to persistent flare, and 1% (1/142) only tapered one step due to investigator error.

Dichotomous outcomes were analysed as crude risk difference for the between group comparison using generalised linear models for binomial data. Continuous outcomes were analysed using repeated-measures linear mixed-effects models as least squares means with standard error.

<sup>1</sup>: Analysed as tapering group – control group.

<sup>2</sup>: Compared to baseline biologic dose.

<sup>3</sup>: RA and PsA: Disease Activity Score (DAS)28-CRP, and axSpA: Ankylosing Spondylitis Disease Activity Score (ASDAS).

<sup>4</sup>: RA and PsA: DAS28-CRP <2.6 and axSpA: ASDAS <1.3.

<sup>5</sup>: RA and PsA: DAS28-CRP ≤3.2 and axSpA: ASDAS <2.1.

**Supplementary Table S6:** Sub-group analyses on the primary efficacy endpoint ‘≥50% biologic dose reduction’ i.e. patients receiving ≥50% reduced biologic dose at 18 months analysed “as observed” based on the ITT population.

| Subgroup                          | Tapering group<br>n/N (%) | Control group<br>n/N (%) | Contrast within sub-groups <sup>1</sup><br>RD (95% CI) | Contrast between sub-groups <sup>2</sup><br>RD (95% CI) | p-value for interaction <sup>2</sup> |
|-----------------------------------|---------------------------|--------------------------|--------------------------------------------------------|---------------------------------------------------------|--------------------------------------|
| <b>Overall</b>                    | 35/88 (40%)               | 1/46 (2%)                | 0.38 (0.27 to 0.49)                                    | –                                                       | –                                    |
| <b>Diagnosis</b>                  |                           |                          |                                                        | -0.18 (-0.40 to 0.05)                                   | 0.122                                |
| RA or PsA <sup>3</sup>            | 19/55 (35%)               | 1/27 (4%)                | 0.31 (0.16 to 0.45)                                    |                                                         |                                      |
| AxSpA <sup>4</sup>                | 16/33 (48%)               | 0/19 (0%)                | 0.48 (0.31 to 0.66)                                    |                                                         |                                      |
| <b>Sex</b>                        |                           |                          |                                                        | -0.06 (-0.29 to 0.17)                                   | 0.626                                |
| Female                            | 19/48 (40%)               | 1/19 (5%)                | 0.34 (0.17 to 0.51)                                    |                                                         |                                      |
| Male                              | 16/40 (40%)               | 0/27 (0%)                | 0.40 (0.25 to 0.55)                                    |                                                         |                                      |
| <b>Age</b>                        |                           |                          |                                                        | 0.11 (-0.11 to 0.33)                                    | 0.321                                |
| <55 years old                     | 19/44 (43%)               | 0/23 (0%)                | 0.43 (0.29 to 0.58)                                    |                                                         |                                      |
| ≥55 years old                     | 16/44 (36%)               | 1/23 (4%)                | 0.32 (0.16 to 0.48)                                    |                                                         |                                      |
| <b>Repeated biologics failure</b> |                           |                          |                                                        | 0.54 (-0.10 to 1.19)                                    | 0.100                                |
| <3                                | 34/83 (41%)               | 0/43 (0%)                | 0.41 (0.30 to 0.52)                                    |                                                         |                                      |
| ≥3                                | 1/5 (20%)                 | 1/3 (33%)                | -0.13 (-0.77 to 0.51)                                  |                                                         |                                      |
| <b>Biologic mode of action</b>    |                           |                          |                                                        | 0.13 (-0.35 to 0.62)                                    | 0.590                                |
| TNFi                              | 32/81 (40%)               | 0/40 (0%)                | 0.40 (0.29 to 0.50)                                    |                                                         |                                      |
| Non-TNFi <sup>5</sup>             | 3/7 (43%)                 | 1/6 (17%)                | 0.26 (-0.21 to 0.73)                                   |                                                         |                                      |
| <b>Disease activity</b>           |                           |                          |                                                        | 0.11 (-0.17 to 0.41)                                    | 0.428                                |
| Baseline remission                | 32/77 (42%)               | 1/39 (3%)                | 0.39 (0.27 to 0.51)                                    |                                                         |                                      |
| Baseline LDA                      | 3/11 (27%)                | 0/7 (0%)                 | 0.27 (0.01 to 0.54)                                    |                                                         |                                      |

N: number, RD: risk difference, CI: confidence interval, RA: rheumatoid arthritis, PsA: psoriatic arthritis, axSpA: axial spondyloarthritis, TNFi: tumour necrosis factor alpha inhibitor, LDA: low disease activity.

<sup>1</sup>: Analysed as crude risk difference (i.e. risk in tapering group – risk in control group) using generalised linear models for binomial data.

<sup>2</sup>: Analysed using binary (logistic) regression.

<sup>3</sup>: Monitored by DAS28-CRP.

<sup>4</sup>: Monitored by ASDAS.

<sup>5</sup>: Treatment with abatacept or tocilizumab.

**Supplementary Table S7:** Sub-group analyses on the primary efficacy endpoint ‘disease activity’ i.e. disease activity at 18 months analysed “as observed” based on the ITT population.

| Subgroup                          | Tapering group   |             | Control group    |             | Contrast within sub-groups <sup>2</sup> | Contrast between sub-groups <sup>3</sup> | p-value for interaction <sup>3</sup> |
|-----------------------------------|------------------|-------------|------------------|-------------|-----------------------------------------|------------------------------------------|--------------------------------------|
|                                   | n/N <sup>1</sup> | Mean (SE)   | n/N <sup>1</sup> | Mean (SE)   | Mean difference (95% CI)                | Mean difference (95% CI)                 |                                      |
| <b>Overall</b>                    | 88/88            | 1.73 (0.08) | 44/46            | 1.67 (0.09) | 0.05 (-0.20 to 0.31)                    | —                                        | —                                    |
| <b>Diagnosis</b>                  |                  |             |                  |             |                                         | -0.18 (-0.67 to 0.32)                    | 0.480                                |
| RA or PsA <sup>4</sup>            | 55/88            | 1.89 (0.09) | 27/44            | 1.91 (0.12) | -0.02 (-0.33 to 0.30)                   |                                          |                                      |
| AxSpA <sup>5</sup>                | 33/88            | 1.46 (0.12) | 17/44            | 1.3 (0.11)  | 0.16 (-0.22 to 0.53)                    |                                          |                                      |
| <b>Sex</b>                        |                  |             |                  |             |                                         | -0.49 (-0.97 to 0.001)                   | 0.050                                |
| Female                            | 48/88            | 1.83 (0.11) | 19/44            | 2.07 (0.15) | -0.25 (-0.63 to 0.14)                   |                                          |                                      |
| Male                              | 40/88            | 1.61 (0.11) | 25/44            | 1.37 (0.08) | 0.24 (-0.07 to 0.55)                    |                                          |                                      |
| <b>Age</b>                        |                  |             |                  |             |                                         | 0.13 (-0.36 to 0.62)                     | 0.607                                |
| <55 years old                     | 44/88            | 1.55 (0.10) | 22/44            | 1.44 (0.10) | 0.12 (-0.20 to 0.44)                    |                                          |                                      |
| ≥55 years old                     | 44/88            | 1.90 (0.11) | 22/44            | 1.91 (0.15) | -0.01 (-0.38 to 0.37)                   |                                          |                                      |
| <b>Repeated biologics failure</b> |                  |             |                  |             |                                         | 0.25 (-0.75 to 1.26)                     | 0.620                                |
| <3                                | 83/88            | 1.69 (0.08) | 41/44            | 1.61 (0.08) | 0.08 (-0.17 to 0.33)                    |                                          |                                      |
| ≥3                                | 5/88             | 2.36 (0.30) | 3/44             | 2.53 (0.75) | -0.17 (-1.83 to 1.48)                   |                                          |                                      |
| <b>Biologic mode of action</b>    |                  |             |                  |             |                                         | 0.03 (-0.76 to 0.82)                     | 0.946                                |
| TNFi                              | 81/88            | 1.68 (0.08) | 38/44            | 1.59 (0.09) | 0.08 (-0.17 to 0.35)                    |                                          |                                      |
| Non-TNFi <sup>6</sup>             | 7/88             | 2.23 (0.29) | 6/44             | 2.17 (0.38) | 0.06 (-0.98 to 1.10)                    |                                          |                                      |
| <b>Disease activity</b>           |                  |             |                  |             |                                         | -0.26 (-1.01 to 0.50)                    | 0.503                                |
| Baseline remission                | 77/88            | 1.72 (0.09) | 38/44            | 1.69 (0.11) | 0.02 (-0.26 to 0.30)                    |                                          |                                      |
| Baseline LDA                      | 11/88            | 1.81 (0.16) | 6/44             | 1.53 (0.19) | 0.28 (-0.28 to 0.83)                    |                                          |                                      |

N: number, SE: standard error, CI: confidence interval, RA: rheumatoid arthritis, PsA: psoriatic arthritis, axSpA: axial spondyloarthritis, TNFi: tumour necrosis factor alpha inhibitor, LDA: low disease activity.

<sup>1</sup>: Number of observations/number of patients in the “as observed” ITT population

<sup>2</sup>: Analysed as mean difference in tapering group – mean difference in control group using ANOVA.

<sup>3</sup>: Analysed using ANOVA.

<sup>4</sup>: Monitored by DAS28-CRP.

<sup>5</sup>: Monitored by ASDAS.

<sup>6</sup>: Treatment with abatacept or tocilizumab



**Supplementary Figure S1:** Overview of the disease activity-guided tapering algorithm applied for patients in the tapering group during the BIODOPT trial.

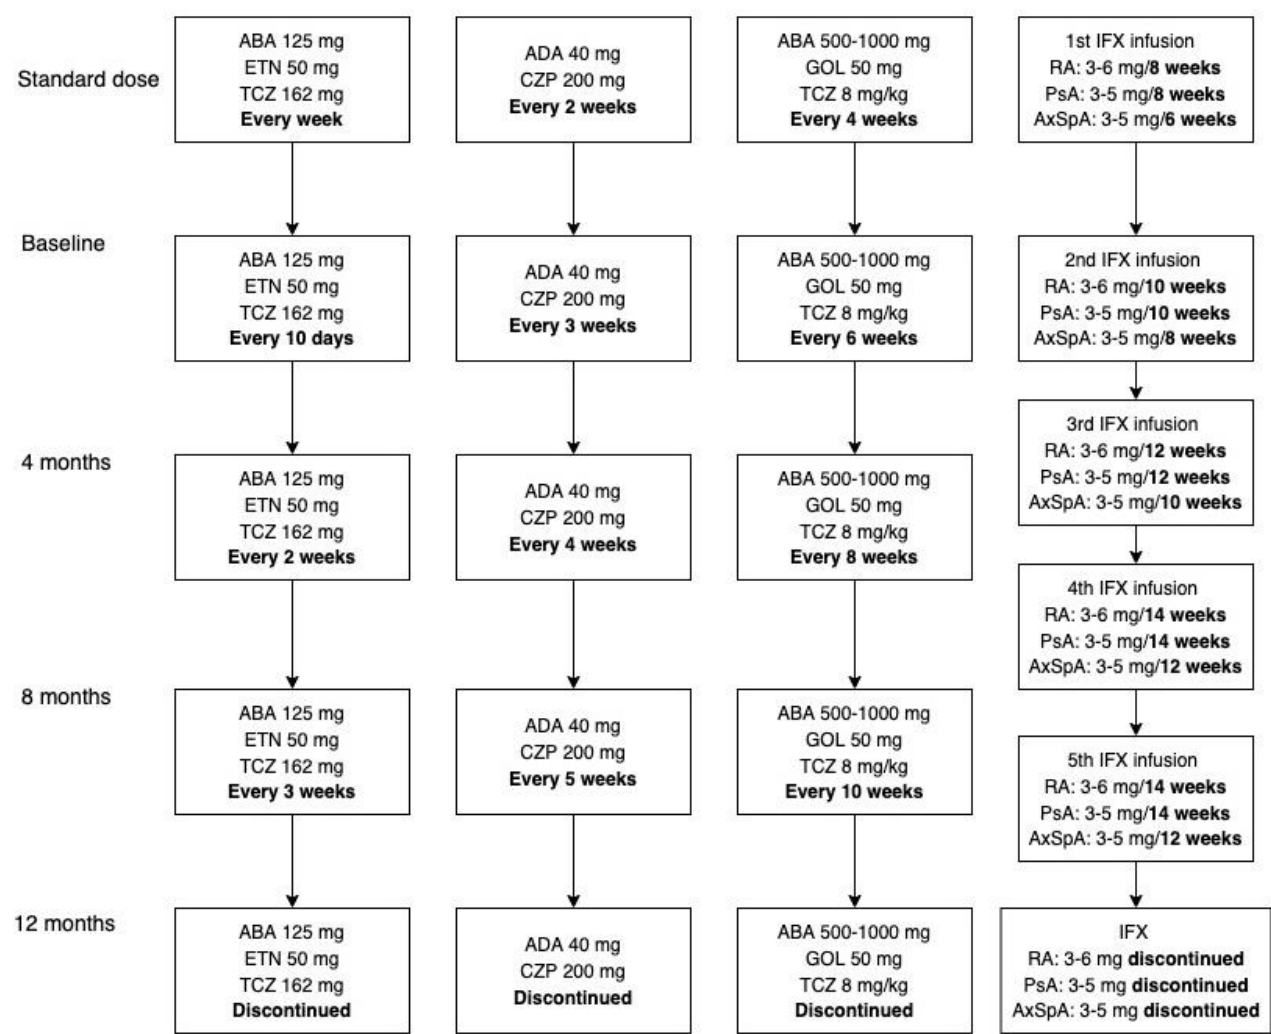

ABA: abatacept, mg: milligram, ETN: etanercept, TCZ: tocilizumab, ADA: adalimumab, CZP: certolizumab-pegol, GOL: golimumab, kg: kilogram, IFX: infliximab, RA: rheumatoid arthritis, PsA: psoriatic arthritis, axSpA: axial spondyloarthritis.

**Supplementary Figure S2:** Spaghetti plots of disease activity during the study period in each trial group reported by diagnosis. The red line represents median disease activity.

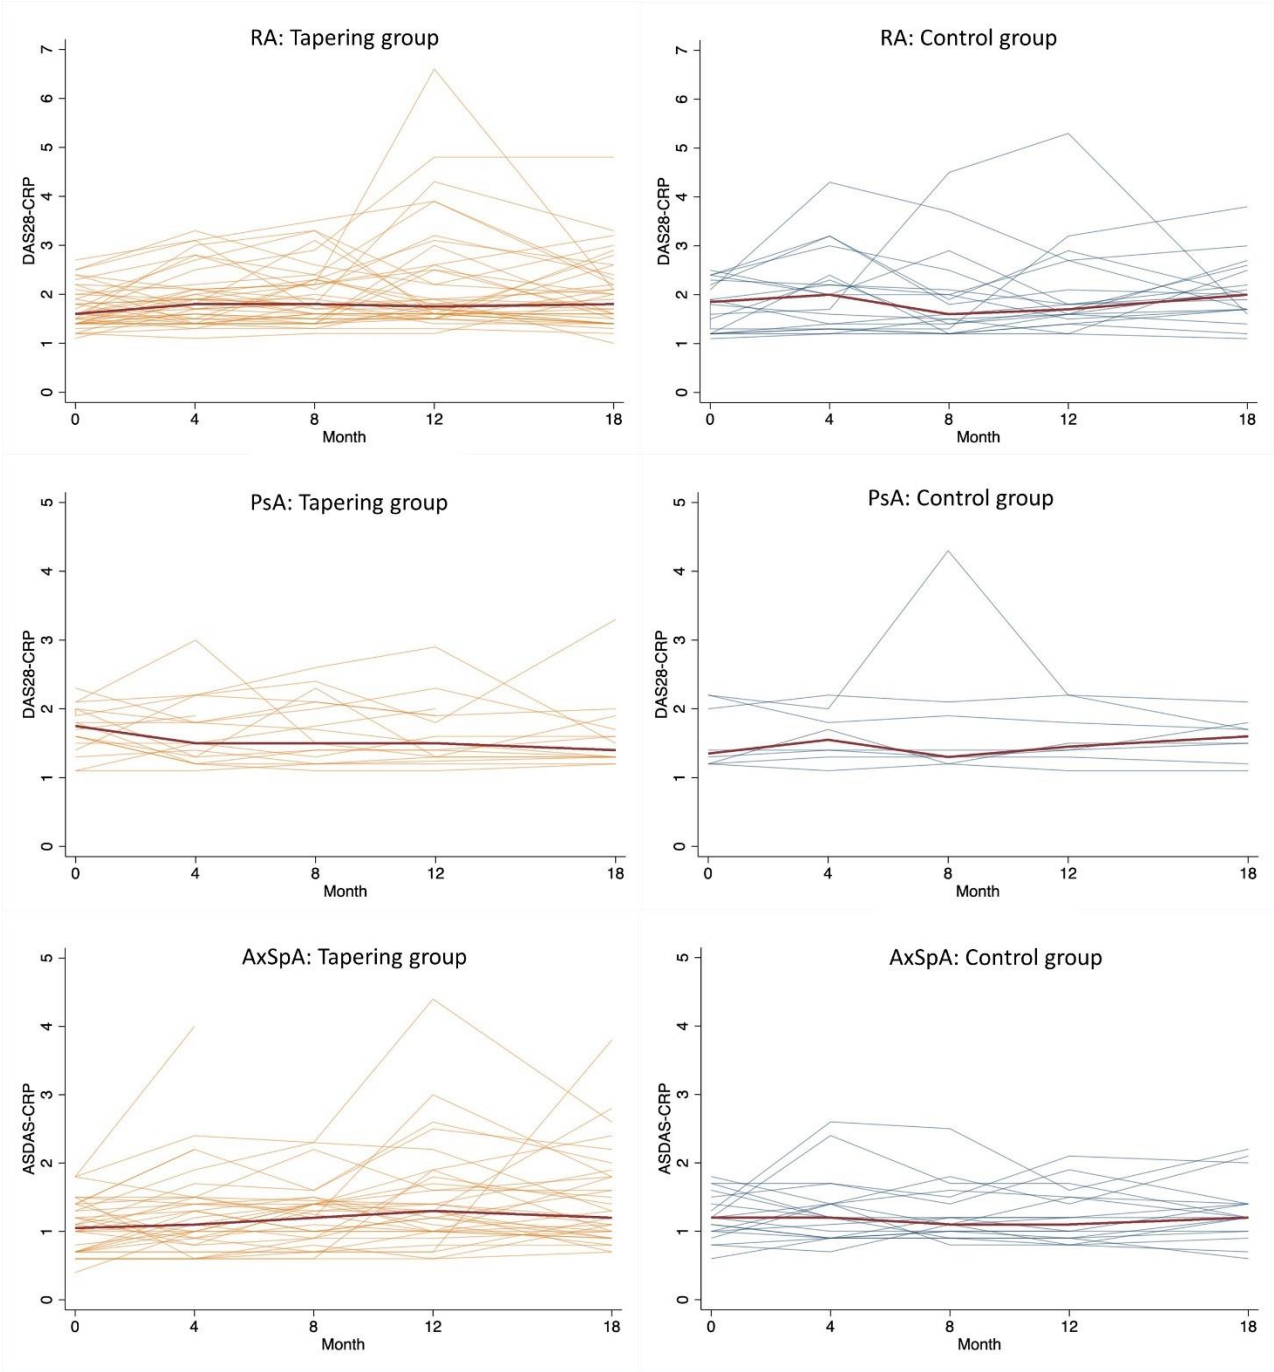

**Dose reduction and discontinuation of biological therapy in patients with rheumatoid arthritis, psoriatic arthritis and axial spondyloarthritis:**

***Protocol for a 18 months randomised, open label, parallel-group, multi-centre trial***

**Brief title:** BIOlogical Dose OPTimisation (The BIODOPT trial)

*This trial will be conducted in compliance with the protocol, International Conference on Harmonisation (ICH) Good Clinical Practice (GCP) guideline and all other applicable regulatory requirements.*

**Sponsor-investigator:** Salome Kristensen, MD, PhD

**Coordinating investigator:** Line Uhrenholt, MD

**AUTHORS/COLLABORATORS**

Line Uhrenholt<sup>1,2,3</sup>, Annette Schlemmer<sup>1</sup>, Ellen-Margrethe Hauge<sup>3,4</sup>, Robin Christensen<sup>2</sup>, Salome Kristensen<sup>1</sup>

**AFFILIATIONS**

1: Department of Rheumatology, Aalborg University Hospital, Denmark

2: Musculoskeletal Statistics Unit, The Parker Institute, Bispebjerg and Frederiksberg Hospital, Copenhagen, Denmark

3: Department of Rheumatology, Aarhus University Hospital, Denmark

4: Department of Clinical Medicine, Aarhus University, Denmark

**TRIAL REGISTRATION**

The Ethics Committee of Northern Region of Jutland

Danish Medicines Agency

Danish Data Protection Agency

The trial will be registered on EudraCT before enrolling patients.

**TRIAL SITES**

Aalborg University Hospital, Aarhus University Hospital, Odense University Hospital and Regional Hospital of Northern Jutland, Hjørring

**PROTOCOL VERSION 7**

December 16, 2017

Protocol number: 20170508

EudraCT number: 2017-001970-41

## 1. TABLE OF CONTENTS

|                                                                    |         |
|--------------------------------------------------------------------|---------|
| Title page                                                         | Page 01 |
| 1. Table of contents                                               | Page 02 |
| 2. List of abbreviations and definitions of terms                  | Page 05 |
| 3. Trial sites                                                     | Page 08 |
| 4. The BIODOPT trial group                                         | Page 08 |
| 5. Collaborators                                                   | Page 10 |
| 5.1. The Biochemistry Department                                   | Page 10 |
| 5.2. The Danish Rheumatology Biobank                               | Page 10 |
| 5.3. Good Clinical Practice (GCP) units                            | Page 10 |
| 5.4. Research Electronic Data Capture (REDCap)                     | Page 10 |
| 6. Introduction                                                    | Page 11 |
| 6.1. Summary                                                       | Page 11 |
| 6.2. Background                                                    | Page 12 |
| 6.2.1. Inflammatory conditions: epidemiology                       | Page 12 |
| 6.2.2. Inflammatory conditions: management                         | Page 12 |
| 6.2.3. Evidence Based Research: Tapering and withdrawal strategies | Page 13 |
| 6.2.4. Rationale for the BIODOPT trial                             | Page 15 |
| 7. Research hypothesis                                             | Page 16 |
| 8. Objectives                                                      | Page 16 |
| 8.1. The primary objectives                                        | Page 16 |
| 8.2. The secondary objectives                                      | Page 16 |
| 9. Methods                                                         | Page 17 |
| 9.1 Trial design                                                   | Page 17 |
| 9.2. Setting                                                       | Page 19 |
| 9.3. Participants                                                  | Page 19 |
| 9.3.1. Recruitment                                                 | Page 19 |
| 9.3.2. Eligibility criteria                                        | Page 19 |
| 9.3.2.1. Inclusion criteria                                        | Page 19 |
| 9.3.2.2 Exclusion criteria                                         | Page 20 |
| 9.4. DANBIO                                                        | Page 21 |
| 9.5. Remission criteria                                            | Page 21 |
| 9.6. Flare criteria                                                | Page 22 |
| 9.7. Interventions                                                 | Page 23 |

|                                                                                 |         |
|---------------------------------------------------------------------------------|---------|
| 9.8. Study drug                                                                 | Page 23 |
| 9.9. Drug accountability                                                        | Page 25 |
| 9.10 Dose optimisation tapering algorithm                                       | Page 25 |
| 9.10.1 Dose optimisation/tapering algorithm for ETN, ADA, GOL, CZP, ABA and TCZ | Page 26 |
| 9.10.2 Dose optimisation/tapering algorithm for IFX                             | Page 28 |
| 9.10.3 Patients in reduced-dose biological therapy prior to trial entry         | Page 29 |
| 9. 10.4 Anti-drug antibodies and dose optimisation                              | Page 30 |
| 9.11. Pause of the biological therapy                                           | Page 30 |
| 9.12. Concomitant treatment                                                     | Page 30 |
| 9.13. Patient-involvement                                                       | Page 31 |
| 9.14. Trial visits                                                              | Page 31 |
| 9.14.1. Baseline                                                                | Page 32 |
| 9.14.2. Visit at 4, 8, 12, 24 and 60 month                                      | Page 32 |
| 9.14.3. Visit at 18 month                                                       | Page 33 |
| 9.14.4. Extra visits                                                            | Page 33 |
| 9.14.5. Early termination visit                                                 | Page 33 |
| 9.14.6. Telephone follow up                                                     | Page 34 |
| 9.14.7. Overview of trial procedures                                            | Page 34 |
| 9.15. Clinical procedures                                                       | Page 38 |
| 9.15.1. Medical history                                                         | Page 38 |
| 9.15.2. Patient reported outcome measures                                       | Page 38 |
| 9.15.3. Clinical assessments                                                    | Page 39 |
| 9.15.4. Laboratory tests                                                        | Page 40 |
| 9.15.4.1. Baseline blood tests                                                  | Page 41 |
| 9.15.4.2. Blood test visit 4, 8, 12, 18, 24 and 60 months                       | Page 42 |
| 9.15.4.3. Synovial fluid tests                                                  | Page 42 |
| 9.16. Biobank in the BIODOPT trial                                              | Page 43 |
| 9.17. Outcomes                                                                  | Page 43 |
| 9.17.1. Primary outcome                                                         | Page 43 |
| 9.17.2. Key secondary outcome                                                   | Page 44 |
| 9.17.3 Tertiary (exploratory secondary) outcome                                 | Page 45 |
| 9.18. Power and sample size estimation                                          | Page 45 |
| 9.19. Randomisation and group allocation                                        | Page 46 |

|                                                                       |         |
|-----------------------------------------------------------------------|---------|
| 9.19.1. Sequence generation                                           | Page 46 |
| 9.19.2. Allocation concealment mechanism and implementation           | Page 47 |
| 9.19.4. Blinding                                                      | Page 47 |
| 9.20. Statistical methods                                             | Page 47 |
| 9.21. Data management                                                 | Page 48 |
| 9.22. Participant retention                                           | Page 49 |
| 9.23. Removal of participants from the trial                          | Page 49 |
| 9.24. Discontinuation of the entire trial                             | Page 50 |
| 10. Harms and safety measures                                         | Page 50 |
| 11. Adverse events                                                    | Page 51 |
| 12. Pregnancy                                                         | Page 53 |
| 13. Ethics                                                            | Page 54 |
| 13.1. Ethical consideration                                           | Page 54 |
| 13.2. Recruitment procedures                                          | Page 55 |
| 13.3. Informed consent                                                | Page 56 |
| 14. Confidentiality                                                   | Page 57 |
| 15. Monitoring                                                        | Page 57 |
| 16. Compensation and insurance                                        | Page 58 |
| 17. Protocol amendments                                               | Page 58 |
| 18. Declaration of interest                                           | Page 58 |
| 19. Dissemination policy                                              | Page 59 |
| 19.1. Dissemination from the coordinating investigator to the sponsor | Page 59 |
| 19.2. Dissemination to health and regulatory authorities              | Page 59 |
| 19.3. Dissemination of trial results                                  | Page 59 |
| 20. Budget                                                            | Page 60 |
| 21. Time schedule                                                     | Page 60 |
| 22. Feasibility of the trial                                          | Page 61 |
| 23. Investigators and sponsors agreement                              | Page 62 |
| 24. References                                                        | Page 63 |
| 25. List of appendix'                                                 | Page 71 |

## **2. LIST OF ABBREVIATIONS AND DEFINITIONS OF TERMS**

ICH: International Conference on Harmonisation

GCP: Good Clinical Practice

LU: Line Uhrenholt

SK: Salome Kristensen

ASc: Annette Schlemmer

EMH: Ellen-Margrethe Hauge

RC: Robin Christensen

KHH: Kathrine Hyldig Hansen

REDCap: Research Electronic Data Capture

JHW: Johanne Hovgaard Winther

RA: Rheumatoid arthritis

SpA: Axial spondyloarthritis

PsA: Psoriatic arthritis

DAS28crp: Disease Activity Score<sub>28crp</sub>

ASDAS: Ankylosing Spondylitis Disease Activity Score

DAPSA: Disease Activity in Psoriatic Arthritis

IBD: Inflammatory bowel disease

T2T: Treat-to-target

LDA: Low disease activity

DMARD: Disease-modifying antirheumatic drugs

ETN: Etanercept

MTX: Methotrexat

RCT: Randomized controlled trial

ADA: Adalimumab

AS: Ankylosing spondylitis

IFX: Infliximab

PROMs: Patient Reported Outcome Measures

VAS: Visual Analog Scale

HAQ-DI: Health Assessment Questionnaire Disability Index

BASDAI: Bath Ankylosing Spondylitis Disease Activity Index

BASFI: Bath Ankylosing Spondylitis Functional Index

DRS: Dansk Reumatologisk Selskab (The Danish Rheumatology Society)

EULAR: European League Against Rheumatism

GRAPPA: Group for Research and Assessment of Psoriasis and Psoriatic Arthritis

RADS: Rådet for Anvendelse af Dyr Sygehusmedicin (The Council for the Use of Expensive Hospital Medicine)

ACR: American College of Rheumatology

ASAS: Assessment of SpondyloArthritis

SAA: Spondylitis Association of America

SPARTAN: Spondyloarthritis Research and Treatment Network

DOT: Dose optimisation tapering group

UC: Usual care group

CASPAR: CIASSification criteria for Psoriatic ARthritis

ABA: Abatacept

CZP: Certolizumab pegol

GOL: Golimumab

TCZ: Tocilizumab

DANBIO: Danish Rheumatology Database

IUD: Intrauterine device

SPARCC: Spondyloarthritis Research Consortium Canada enthesitis score

BASMI: Bath Ankylosing Spondylitis Metrology Index

CRP: C-reactive protein

OMERACT: Outcome Measures in Rheumatology

FMK: Fælles Medicin Kort (online medicine card)

ADAb: Anti-drug antibodies

NSAID: Non-Steroidal Anti-Inflammatory Drugs

e-CRF: Electronic Case Report Form

MRI: Magnetic Resonance Imaging

PASI: Psoriasis Area Severity Index

mNAPSI: Modified Nail Psoriasis Severity Index

ET: Early termination visit

FU: Telephone follow up visit

PtGH: Patient Global Health



SF-36: Short Form Health Survey 36

B-hcg: Blood test for Human Chorion Gonadotropin

ALAT: Alanine transaminase

BASP: Alkaline phosphatase

TSH: Thyroid-stimulating hormone

IgM-RF: IgM rheumatoid factor

Anti-CCP: Anti-cyclic citrullinated peptide

ANA: Antinuclear antibody

HLA-B27: Human leukocyte antigen subtype B27

CDAI: Clinical Disease Activity Index

SDAI: Simplified Disease Activity Index

MDA: Minimal Disease Activity criteria

SAP: Statistical analysis plan

ITT: Intention-to-treat

AE: Adverse event

SAE: Serious adverse event

SAR: Serious adverse reaction

SUSAR: Suspected unexpected serious adverse reaction

TMF: Trial master file

### **3. TRIAL SITES**

Department of Rheumatology, Aalborg University Hospital, Denmark

Reberbansgade 15, 9000 Aalborg

Telephone: 97664000

Principal investigator: Salome Kristensen, MD, PhD and Annette Schlemmer, MD

Department of Rheumatology, Aarhus University Hospital, Denmark

Nørrebrogade 44, 8000 Aarhus C

Telephone: 78464250

Principal investigator: Ellen-Margrethe Hauge, MD, PhD, Professor

Department of Rheumatology, Odense University Hospital, Denmark

Søndre Boulevard 29, 5000 Odense C

Telephone: 65414445

Principal investigator: Torkell Ellingsen, MD, PhD, Professor and Hans Christian Horn, MD

Department of Rheumatology, Regional Hospital of Northern Jutland, Hjørring, Denmark

Bispensgade 37, 9800 Hjørring

Telephone: 97640989

Principal investigator: Marcin Kowalski, MD

### **4. THE BIODOPT TRIAL GROUP**

The BIODOPT trial group consist of MD Line Uhrenholt (LU), MD, PhD, chief physician Salome Kristensen (SK), MD, chief physician Annette Schlemmer (ASc), MD, PhD, professor, chief physician Ellen-Margrethe Hauge (EMH) and senior biostatistician Robin Christensen (RC). The investigators LU, SK and ASc conceived the trial hypothesis. LU, SK, ASc, EMH and RC have designed the trial, are responsible for implementation of the trial, analysis of the results and publication in scientific journals. LU, SK, ASc, EMH, RC and the patient research partner Kathrine Hyldig Hansen (KHH) all contributed to refinement of the trial protocol and approved the final manuscript.

### **Sponsor-investigator and responsible for monitoring by the GCP**

Salome Kristensen

The BIODOPT trial  
Version 7. December 16, 2017 (Protocol\_v7\_16122017)  
EudraCT-number: 2017-001970-41

MD, PhD, chief physician

The Rheumatology Department at Aalborg University Hospital

Reberbansgade 15, 9000 Aalborg

Telephone: 97664000

Email: sakr@rn.dk

### **Coordinating investigator and Trial contact**

Line Uhrenholt

MD

The Rheumatology Department at Aalborg University Hospital

Reberbansgade 15, 9000 Aalborg

Telephone: 97664048/21707727

Email: l.uhrenholt@rn.dk

### **Co-investigators**

Annette Schlemmer

MD, chief physician

The Rheumatology Department at Aalborg University Hospital

Reberbansgade 15, 9000 Aalborg

Email: a.schlemmer@rn.dk

Ellen-Margrethe Hauge

MD, PhD, professor, chief physician

The Rheumatology Department at Aarhus University Hospital

Nørrebrogade 44, 8000 Aarhus C

Email: ellhau@rm.dk

Robin Christensen

Senior biostatistician, MSc, PhD; head of unit

Musculoskeletal Statistics Unit at Parker Institutet, Bispebjerg and Frederiksberg Hospital

Nordre Fasanvej 57, Vej 8, Indgang 19, 2000 Frederiksberg

Email: robin.christensen@regionh.dk

**Patient research partner**

Kathrine Hyldig Hansen

**5. COLLABORATORS**

**5.1. The Biochemistry Department**

The Biochemistry Department at Aalborg University Hospital

Reberbansgade 15, 9000 Aalborg

Telephone: 97664900

**5.2. The Danish Rheumatology Biobank**

Danish Cancer Biobank at the Pathology Department, Herlev Hospital

Herlev Ringvej 75, 2730 Herlev

Telephone: 38689132

**5.3. GCP units**

**GCP units at Aalborg and Aarhus University Hospital**

Aarhus University, Olof Palmes Allé 15, 8200 Aarhus N

Telephone: 78413950

Contact: Visnja Sukara

**GCP unit at Odense University Hospital**

The Biochemistry and Pharmacology Department at Odense University Hospital

J. B. Winsløws Vej 19, 2. sal, 5000 Odense C

Telephone: 65504360

**5.4. Research Electronic Data Capture (REDCap) at Aalborg University Hospital**

The Unit for Epidemiology and Biostatistics at Aalborg University Hospital

Forskningens Hus, Sdr. Skovvej 15, 9000 Aalborg

Telephone: 97662949

Contact: Johanne Hovgaard Winther (JHW)

## 6. INTRODUCTION

### 6.1. Summary

Background: The treatment of rheumatoid arthritis (RA), axial spondyloarthritis (SpA) and psoriatic arthritis (PsA) has undergone dramatic changes over the past 20 years mainly due to introduction of biological agents combined with close monitoring according to the treat-to-target principles. Recent studies have shown that a large proportion of patients with RA, SpA or PsA can maintain remission after tapering or even after withdrawal of the biological therapy.

Objectives: To evaluate whether a patient-involving dose optimisation tapering strategy for biological therapy will enable a superior dose-reduction ( $\geq 50\%$ ) while being equivalent in maintaining disease activity assessed 18 months from baseline compared with “usual care” (i.e. continuing biological therapy unchanged). The co-primary endpoint is thus:

1A Superiority: The proportion of patients who at 18 months is reduced to 50% or less of their inclusion dose of biological therapy.

1B Equivalence: Disease activity assessed 18 months from baseline

Key secondary endpoints at 18 months include the proportion of patients in remission and receiving reduced dose biological therapy and the proportion of patients in remission despite discontinuation of biological therapy. Exploratory objectives are to identify potential prognostic factors for flare after tapering of biological therapy and to explore potentially important factors associated with remission maintenance after the biological therapy is reduced or even discontinued.

Trial population: this trial will include participants with RA, SpA (including patients with PsA with axial involvement) and PsA (with peripheral involvement) in treatment with biological agents who have achieved sustained clinical remission for at least 1 year and who comply with all eligibility criteria. Remission is defined as Disease Activity Score<sub>28crp</sub> (DAS<sub>28crp</sub>)  $< 2.6$  (Appendix 1) in patients with RA, Ankylosing Spondylitis Disease Activity Score (ASDAS)  $< 1.3$  (Appendix 2) in patients with SpA and Disease Activity in Psoriatic Arthritis (DAPSA)  $\leq 4$  (Appendix 3) in patients with PsA.

Perspective: continuation of standard dose of biological therapy in patients with RA, SpA or PsA in sustained clinical remission will potentially lead to overtreatment and thus unnecessary side effects e.g. common and serious infections. Furthermore, biological therapy is costly and therefore, if dose optimisation (tapering or even withdrawal) is possible, benefits for society (incl. costs) would be anticipated. The outcome of this trial could lead to a significant change in the clinical management of biological therapy in patients with RA, SpA and PsA.

## **6.2. Background**

### **6.2.1. Inflammatory conditions: epidemiology**

RA, SpA and PsA are the three largest inflammatory arthritis groups in the rheumatology outpatient clinics. In Denmark, 0.7% of the population is estimated to suffer from RA (1), a disease characterised by peripheral, symmetric polyarthritis that can be accompanied by extra-articular manifestations like tenosynovitis, bursitis, rheumatoid nodules, serositis etc. (1). 0.5-2% of the Danish population is estimated to suffer from SpA (2), which is characterised by axial and possibly peripheral arthritis and can be accompanied by extra-articular manifestations like enthesitis, dactylitis, skin and nail psoriasis, inflammatory bowel disease (IBD) or uveitis (3). The prevalence of PsA is probably underestimated, as 0.1% of the population is estimated to suffer from PsA (4), while up to 30% of patients with skin psoriasis (prevalence 1-3%) is estimated to have PsA (5). PsA is characterised by peripheral and/or axial arthritis and can be accompanied by extra-articular manifestations like enthesitis, dactylitis, skin and nail psoriasis (5).

### **6.2.2. Inflammatory conditions: management**

The treatment of RA has been significantly improved over the past 20 years partly due to the treat-to-target (T2T) principles, which consist of early diagnosis, defining a target (remission/low disease activity (LDA)) and applying tight control with adaptations of the arthritis treatment until the target is reached. This treatment strategy has been able to reduce arthritis activity compared to previous treatment regimes (6–11). Within the last years, the same treatment strategy has been shown to reduce arthritis activity in patients with PsA compared to previous treatment regimes (12). In daily clinical practice, SpA is treated after the T2T recommendations (13), but this is mainly based on expert opinions, as there currently is no clinical evidence of T2T in SpA (14–16). However, these individualized strategies is used as expert assessment finds it very likely to improve patient outcomes and long-term quality of life (13).

In addition to the T2T paradigm, biological agents has significantly improved treatment for patients with RA, SpA and PsA, thus increasing the numbers of patients in sustained clinical remission (17–33) – particularly patients with severe arthritis activity, as it is this group of patients that are candidates for biological therapy according to national and international guidelines.

### **6.2.3. Evidence Based Research: Tapering and withdrawal strategies**

To avoid waste of research, no new studies should be initiated without a systematic review of the existing evidence (34). For the last two decades, the perception has been that biological therapy would be a lifelong treatment. However, recent studies indicate that a significant proportion of patients in clinical remission, can taper their biological therapy and still maintain remission (35–48). Currently, several tapering studies have been performed in patients with RA. However, these studies are often initiated by the pharmaceutical industry, thus involving only one biological drug per study and is often part two of an efficacy study (35,36,40,49,50); furthermore, in these studies, the population is often newly diagnosed and start biological therapy without prior disease-modifying antirheumatic drugs (DMARD) (36,40,49,50). Therefore, these patients do not necessarily need biological therapy and thus, it may be easier to taper the dose of the biological therapy and maintain remission or LDA (36,40,49,50). The PRESERVE trial, a major efficacy trial of etanercept (ETN), included, in contrast to the studies described above, patients with RA with moderate arthritis activity despite methotrexate (MTX) treatment (35). In part 2 of the trial it was found, that 82.6% of patients who continued standard dose ETN and 79.1% of patients who reduced ETN dose by 50% remained in LDA 1 year after, while significantly fewer patients who discontinued ETN maintained LDA (42.6%). In the DOSERA trial, a smaller Nordic randomised controlled trial (RCT), patients with RA from outpatients clinics who had achieved sustained LDA on ETN + MTX were included (37). The trial found, that 52% of patients who continued ETN in standard dose and 44% of those who reduced ETN dose by 50% had no flare over 48 weeks, while this only applied to 13% of patients who discontinued ETN (37). In a non-inferiority RCT with patients with RA, 20% of patients who gradually reduced dose of their biological therapy (adalimumab (ADA) or ETN) discontinued the treatment over 18 months while 43% received reduced doses and 37% had an arthritis flare (39). The dose optimisation of ADA and ETN was non-inferior to “usual care”. Several studies have shown that discontinuation of biological therapy without prior dose reduction causes flare in up to 51% of patients with RA (49,51–56), however most patients regain remission after dose escalation to standard dose (49,51,54,56).

Dose optimisation of biological therapy in patients with SpA has been studied in several smaller trials. In the ANSWERS trial, a smaller RCT and ETN efficacy trial, 52% of patients with ankylosing spondylitis (AS) who reduced ETN dose by 50% (tapered group) and 83% of patients with AS who remained on ETN standard dose maintained remission 6 months after (45). However, only 4 out of 11 patients who had a flare in the tapered group needed dose increase of the biological therapy to stand-

ard dose. A small Dutch prospective observation study found that 53% of patients with AS who gradually reduced dose of their biological therapy (ADA, ETN or infliximab (IFX)) by 25% every 6 months remained in remission 24 months after dose optimisation (48). In the study, the mean dose of biological therapy over time corresponded to 62% of the standard dose regimen (48). Other studies have shown that discontinuation of biological therapy without prior dose reduction causes flare in 69-97.6% of patients with SpA (57–59), however most patients regain remission after dose escalation to standard dose (57–59).

Dose optimisation of biological therapy in patients with PsA has only been investigated in a few, smaller studies. In a prospective case-control study with 76 newly diagnosed patients with PsA and 55 with RA, 88.6% of patients with PsA and 17.6% of patients with RA (controls) were still in remission after 50% dose reduction of ADA, mean follow up were 28.9 and 24.2 months (42). A small Spanish cross-sectional study has shown that 27.5% of patients with PsA received reduced dose of their biological therapy, average time on reduced dose was 24.8 months (43). In this study, 42% received ADA 40 mg on average every 23.58 day, 28.6% received ETN 50 mg on average every 12.66 day and 28.6% received IFX average dose 3.77 mg/kg every 8 weeks. A minor, prospective observation study with patient with PsA has examined discontinuation of IXF without prior dose reduction. The study showed that 4 out of 4 patients had a flare, three patients after 2-6 months and one patient after 11 months (60).

Thus, the studies described above indicate that dose optimisation of biological therapy is possible in some patients with RA, SpA and PsA – especially by gradually reducing the dose, as abrupt discontinuation leads to flare in a significant proportion of patients. However, the studies above had a strict tapering algorithm without possibility of patient-involvement, which may cause patient dissatisfaction and lack of adherence to the algorithm.

In Rheumatology, Patient Reported Outcome Measures (PROMs) are essential together with clinical and paraclinical tests in the assessment of arthritis activity and judgement of treatment effect. In clinical practice in Denmark, the PROMs available include Visual Analog Scale (VAS) for pain, fatigue and global assessment of disease activity (Appendix 4), Health Assessment Questionnaire Disability Index (HAQ-DI) (Appendix 5) and for patients with SpA Bath Ankylosing Spondylitis Disease Activity Index (BASDAI) (Appendix 6) and Bath Ankylosing Spondylitis Functional Index (BASFI) (Appendix 7). Thus, the patient's own assessment of arthritis activity is taken into consideration at each visit in the outpatient clinic, allowing the patients to influence any treatment changes and adjustments.



#### **6.2.4. Rationale for the BIODOPT trial**

The tapering studies described above used a strict dose optimisation algorithms without the possibility of interactive patient-involvement. In daily clinical practice, such an approach may underestimate disease activity and cause dissatisfaction among the patients, thus reducing their adherence to the algorithm. Therefore, it seems rational to involve the patient in the dose optimisation and thus, this trial focus on PROMs to illustrate the patients' perception of arthritis activity during tapering. At each clinical visit, the physician evaluates the PROM data from the patient when considering if the patient has a flare. The patient-involvement in this trial also focus on patient educating regarding symptoms of arthritis flare so the patient is aware of symptoms that require assessment in the Rheumatology outpatient clinic.

To our knowledge, no specific national or international guidelines for dose optimisation of biological therapy in patients with RA, SpA or PsA are available. The Danish Rheumatology Society (Dansk Reumatologisk Selskab (DRS)) states in the new guideline for SpA that in absence of evidence, the results of several current studies regarding dose reduction and discontinuation of biological therapy are awaited (61). The same statement will be in the new DRS guideline for RA, which is currently being edited. Dose optimisation of biological therapy is not described in the DRS guideline for PsA from 2014 (5) and because of absence of evidence neither in the guidelines from European League Against Rheumatism (EULAR) (62) or Group for Research and Assessment of Psoriasis And Psoriatic Arthritis (GRAPPA) (63). In the absence of evidence, the Council for the Use of Expensive Hospital Medicine (Rådet for Anvendelse af Dyr Sygehusmedicin (RADS)) cannot provide general recommendations for dose optimisation of biological therapy in patients with RA, SpA and PsA, but abrupt discontinuation is not recommended (64–66). The American College of Rheumatology (ACR) and EULAR suggests dose optimisation of biological therapy by gradually reducing the dose in patients with RA (67,68); however ACR does not recommend discontinuation (68). In the 2017 Assessment of SpondyloArthritis (ASAS)/EULAR guideline it is recommended that dose optimisation by gradually reducing the dose of the biological therapy is considered in patients with SpA in sustained clinical remission for  $\geq 6$  months (69). ACR/Spondylitis Association of America (SAA)/Spondyloarthritis Research and Treatment Network (SPARTAN) guideline from 2016 recommend on the other hand continuation of biological therapy despite sustained remission due to lack of evidence (70). Thus, at present there are to our knowledge no specific guideline for dose optimisation of biological therapy in patients with RA, SpA or PsA. However, both from the individual patient's standpoint, as well as from a societal perspective, it would be advantageous if the biological therapy did not need

to be continued indefinitely but could either be reduced or even discontinued while maintaining sustained clinical remission. Thus, continuation of standard dose of biological therapy in patients in sustained clinical remission can lead to overtreatment and unnecessary side effects e.g. serious infections. In addition, biological therapy is costly and therefore dose optimisation is expected to cause considerable savings in the health budget.

An interactive patient-involvement in dose optimisation of biological therapy is to our knowledge a new approach of interest, but it seems plausible that the patient in this setting is more motivated for the dose reduction, thereby achieving better patient compliance to the algorithm. Thus, in this trial we will examine dose optimisation of biological therapy with a flexible patient-involving algorithm where the patient is an equal partner in their disease management, as expected and required by modern society (71).

## **7. RESEARCH HYPOTHESIS**

The main trial hypothesis is that the use of an interactive patient-involving dose optimisation tapering algorithm for biological therapy will reduce use of biologics while the patients remain in persistent clinical remission.

## **8. OBJECTIVES AND AIMS**

### **8.1. The primary objectives**

To evaluate whether an interactive patient-involving dose optimisation tapering strategy for biological therapy will enable a significant dose-reduction while being equivalent in maintaining disease activity assessed 18 months from baseline compared with “usual care” (i.e. continuing biological therapy unchanged). The co-primary endpoints are thus:

1A Superiority: The proportion of patients who at 18 months is reduced to 50% or less of their inclusion dose of biological therapy.

1B Equivalence: Disease activity assessed 18 months from baseline

The aim of the BIODOPT trial is to assess whether disease activity corresponding to remission can be sustained when doses of biological agents are reduced ( $\geq 50\%$ ) or completely withdrawn.

### **8.2. The secondary objectives**

Key secondary endpoints at 18 months include the proportion of patients in remission and receiving reduced dose biological therapy and the proportion of patients in remission despite discontinuation of biological therapy. Exploratory objectives are to identify potential prognostic factors for flare after

tapering of biological therapy and to explore potentially important factors associated with remission maintenance after the biological therapy is reduced or even discontinued (72–75).

## **9. METHODS**

### **9.1. Trial design**

A randomised controlled, open label, parallel-group, multicentre, equivalence trial of 18 months duration including patients with RA, SpA (including patients with PsA with axial involvement) and PsA (with peripheral involvement) in sustained clinical remission on biological therapy. The participants will be randomised in ratio 2:1 to dose optimisation tapering group (DOT) or usual care group (UC). After the intervention period (the first 12 months of the trial), a follow-up period starts which consist of three visits at 18, 24 and 60 months from baseline. Thus, the trial visits are:

- Baseline
- Visit at 4 months
- Visit at 8 months
- Visit at 12 months
- Visit at 18 months
- Visit at 24 months
- Visit at 60 months

Figure 1 illustrates the trial design with clinical visits, outcome assessments and milestones.

The BIODOPT trial  
Version 7. December 16, 2017 (Protocol\_v7\_16122017)  
EudraCT number: 2017-001970-41  
Figure 1: overview of the trial design

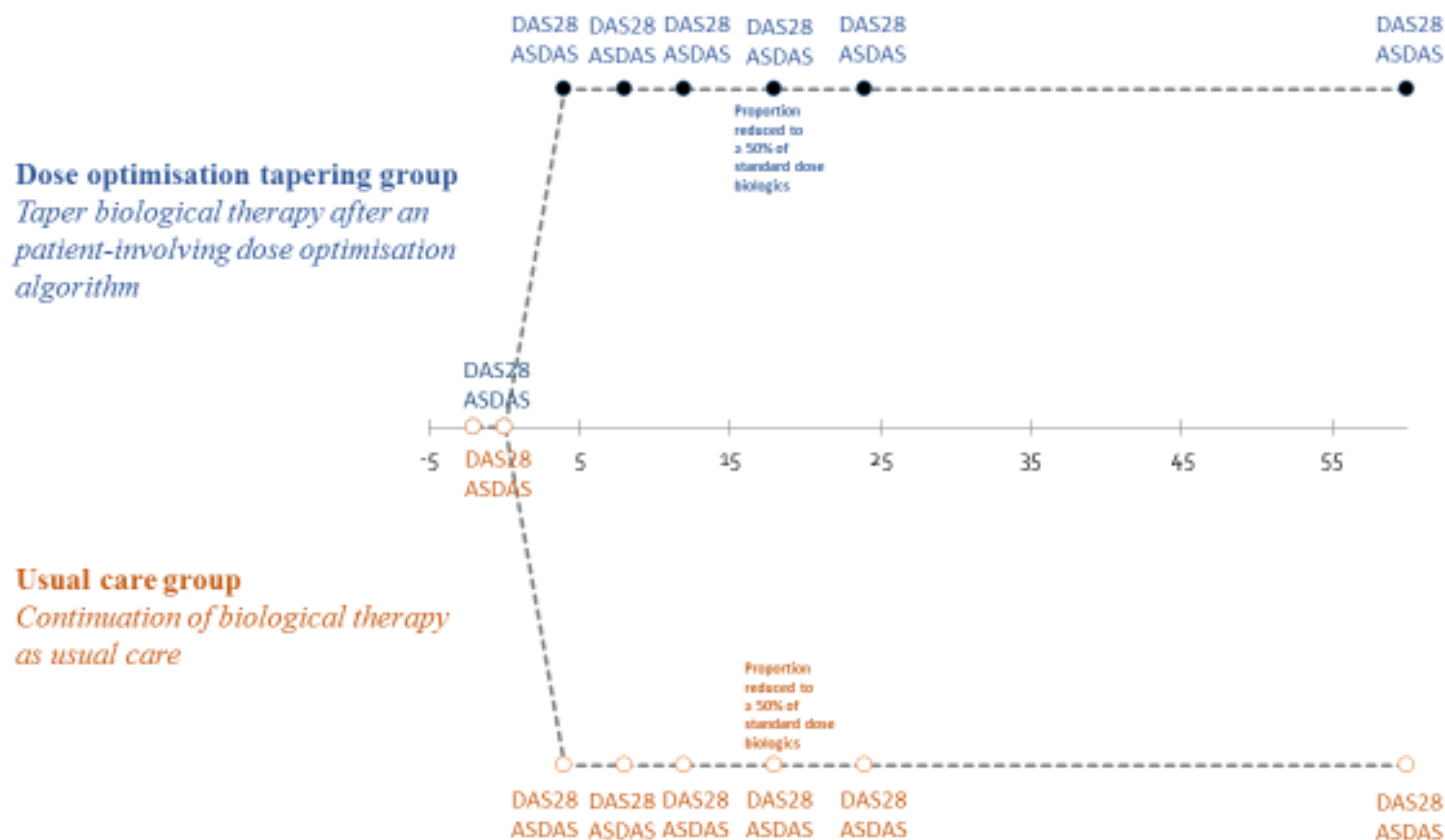

The participants will be randomised 2:1 into either a patient-involving dose optimisation tapering algorithm guided dose reduction of the biological therapy or usual care i.e. continuation of biological therapy as usual care. Disease activity will be monitored systematically throughout the trial by the CRP-based disease activity scores DAS28crp for patients with peripheral arthritis (RA and PsA) and ASDAS for patients with SpA. Trial visits are: baseline, visit at 4, 8, 12, 18, 24 and 60 months.

## **9.2. Setting**

Four Rheumatology Outpatient Clinics in Denmark (Aalborg, Aarhus, Odense and Hjørring) will recruit and enrol patients from November 2017 to November 2018.

## **9.3. Participants**

### **9.3.1. Recruitment**

After submission and approval of the protocol to relevant authorities, the investigators of the four sites will recruit patients from their rheumatology outpatient clinics, see section 13.1. Recruitment procedures for detailed information. Recruiting will continue until the target population is achieved. The screening period is set to 12 months from November 2017 to November 2018.

### **9.3.2. Eligibility criteria**

#### **9.3.2.1. Inclusion criteria**

A participant will be eligible for trial participation if he/she meets the following criteria:

- The participant is able and willing to provide written informed consent and comply with the requirements of this trial protocol.
- The participant is  $\geq 18$  years of age
- Meets the following diagnostic criteria:
  - Patients with RA: 2010 ACR/EULAR Classification Criteria for RA (Appendix 8) and/or 1987 ACR RA Criteria (Appendix 9)
  - Patients with SpA: 1984 modified New York Criteria for AS (Appendix 10) and/or 2009 ASAS Classification of SpA (Appendix 11) and/or axial PsA according to Classification criteria for Psoriatic ARthritis (CASPAR) (Appendix 12) and/or Moll & Wright Criteria (Appendix 13)
  - Patients with PsA: CASPAR Criteria and/or Moll & Wright Criteria
- Participants must be treated with abatacept (ABA), ADA, certolizumab pegol (CZP), ETN, golimumab (GOL), IFX or tocilizumab (TCZ) in stable dose (i.e. standard dose or reduced dose) during the last 12 months
- Participants must be in sustained clinical remission as defined in this protocol during the last 12 months measured by  $\geq 2$  registrations in the Danish Rheumatology Database (DANBIO)

- Female participants with childbearing potential: negative pregnancy test at baseline and practicing one of the following methods of safe birth control, for detailed information see section 12. Pregnancy:
  - Intrauterine device (IUD)
  - Hormonal contraception i.e. birth control pills, birth control implants, birth control patch, birth control vaginal ring or birth control shot (depot injection)
  - A vasectomized partner

#### **9.3.2.2. Exclusion criteria**

A participant cannot be included in the trial if he/she meets any of the following criteria:

- Inability to provide informed consent or unwilling to comply with the trial protocol
- Current oral prednisolone treatment
- Intra-articular or parenteral administration of corticosteroids or a short course of oral prednisolone within the last year
- Dose reduction of the biological therapy is not suitable judged by medical expert assessment due to e.g. patients with previously severe arthritis with difficult to reach remission on biological therapy or patients who previously have tried dose reduction of the biological therapy resulting in flare
- Female participants who is pregnant or breast-feeding or considering becoming pregnant while on biological therapy, MTX and/or leflunomide or within 3-6 months after the last dose, for detailed information see section 12. Pregnancy.
- Participants who have a history of psychiatric or psychological conditions that, in the opinion of the investigator, will affect the ability to participate in the trial
- Addictive or previous addictive behaviour defined as abuse of alcohol, hash, opioids or other euphoric substances
- Participants who is considered an unsuitable candidate for the trial for any reason by the investigator

Men treated with anti-TNF- $\alpha$  can continue their biological therapy during contraception as studies have found no adverse effect on seed quality and no increased risk of adverse effects in fetus/infant in the available studies as stated in the RADS guidelines (76–78).

Allergic reaction or significant sensitivity to constituents of the study drugs are not considered a relevant exclusion criterion in this trial as patients have been treated with the study drugs (biological therapy) > 1 year prior to inclusion.

#### **9.4. DANBIO**

DANBIO is a national Danish Rheumatology database where all adult patients with RA, SpA or PsA is recorded to assess arthritis activity. At each clinical visit, the patients' answers different PROMs on a touch screen in the rheumatology outpatient clinic, alternatively by DANBIO home access just before the clinical visit. In the database, the PROMs answered by the patient, the physicians registration of clinical findings e.g. swollen and tender joint count, enthesitis score by the Spondyloarthritis Research Consortium Canada Score (SPARCC) (Appendix 14) and Bath Ankylosing Spondylitis Metrology Index (BASMI) (Appendix 15) and the most recent C-reactive protein (CRP) level is used to assess arthritis activity in order to conclude if the patient is in remission or not. Thus, the patient's own assessment of arthritis activity is taken into consideration at each visit in the rheumatology outpatient clinic, allowing the patients to influence any treatment changes and adjustments.

#### **9.5. Remission criteria**

In this trial, the following composite scores for the three different diseases are used to assess disease activity. All composite scores are published, validated and currently used for assessment of arthritis activity in trials and/or clinical practice. In this trial, remission is defined as:

RA: DAS28crp < 2.6 and no swollen joints assessed by 46 joint count for swollen and tender joints (46 joint count: Appendix 16)

SpA: ASDAS < 1.3. Additional peripheral involvement: no swollen joints assessed by 66/68 joint count for swollen and tender joints (66/68 joint count: Appendix 17)

PsA: DAPSA  $\leq$  4 and no swollen joints assessed by 66/68 joint count for swollen and tender joints. DAS28crp was chosen for RA over CDAI as a review of patients with RA from the Department of Rheumatology at Aalborg University Hospital showed, that only 1 patient out of 31 in biological therapy, who fulfilled DAS28crp remission but not CDAI remission, had swollen joints – the remaining 30 patients was not in CDAI remission because of a high patient VAS global disease activity. ASDAS was chosen for patients with SpA over BASDAI as it is the recommended index by ASAS and EULAR (69). At present, there are to our knowledge no consensus regarding the preferred efficacy parameter (composite score) for patients with PsA either nationally or internationally. The

DAPSA was chosen in this trial as it is a stringent index that contains 66/68 joint count for swollen and tender joints and is one of the suggested efficacy scores by EULAR (62).

Peripheral arthritis is assessed by joint count – ultrasound assessment is thus not part of this trial, but can be used when in doubt to visualise the joint as done in daily clinical practice today. Arthritis assessed by ultrasound has synovial hypertrophy with grey tone and/or Doppler.

## 9.6. Flare criteria

In this trial, the Outcome Measures in Rheumatology (OMERACT) recommended DAS28 flare criteria for patients with RA is used (79). Currently, no consensus exist regarding which composite score to use for monitoring patients with PsA and thus no flare criteria exist. In this trial, the DAS28 flare criteria is also used for patients with PsA as it currently is the only flare criteria for patients with peripheral arthritis. The ASAS definition of ASDAS worsening for patients with SpA is used as flare criteria in this trial (80). Thus, in this trial, the following flare criteria is used:

RA and PsA: the following points must both be meet:

- $\Delta\text{DAS28crp} > 1.2$  or  $\Delta\text{DAS28crp} > 0.6$  AND current  $\text{DAS28crp} \geq 3.2$
- Arthritis flare assessed by the physician

SpA: one of the following points must be meet:

- Inflammatory back pain AND  $\Delta\text{ASDAS} \geq 0.9$
- Additional peripheral involvement:  $\geq 1$  swollen joint assessed by 66/68 joint count AND arthritis flare assessed by the physician

Arthritis flare assessed by the physician requires exclusion of other reasons for flare e.g. infection, compliance problems or short pause with the biological therapy e.g. due to surgery. If the flare is not caused by dose reduction of the biological therapy, relevant examinations according to current guidelines is performed and the patient continues the biological therapy unchanged. However, patients with ongoing severe infection will pause the biological therapy until the infection is over according to general clinical practice. If the flare is caused by dose reduction of the biological therapy, the patient must increase the dose of the biological therapy to the last dose at which the arthritis was in remission – otherwise the patient is excluded from the trial due to non-compliance. Severe arthritis flare due to tapering that cannot be treated with standard dose of the biological therapy is treated in accordance with the national guidelines e.g. switch to another biological therapy. If the patient has symptoms of arthritis flare during tapering, but the arthritis is in remission assessed by the physician, the patient is



advised to continue tapering according to this protocol but may remain at the current dose after agreement between the patient and the physician.

As patients with PsA can have both axial and peripheral involvement, it is considered a flare if a patient with (peripheral) PsA have inflammatory back pain and an ASDAS flare. Similarly swollen joints in patients with SpA (including patients with PsA with axial involvement) is considered a flare. In Denmark, the indication for biological therapy for patients with RA, SpA or PsA is severe arthritis activity as described in DRS and RADS Guidelines (1,5,61,64–66). Thus, remission is assessed by the physician according to the above remission and flare criteria. However, in this trial other characteristics of SpA and PsA such as enthesitis, dactylitis, skin and nail involvement is also recorded – but the treatment is determined by the patient's peripheral or axial arthritis, because biological therapy for the manifestations mentioned above is not a part of rheumatology in Denmark. If the patient has symptoms of psoriasis flare during tapering, the Dermatological Department is contacted for dialogue and expert opinion in particular need for further examination or treatment adjustment e.g. dose escalation of the biological therapy. The same procedure applies to patient with symptoms of IBD flare during tapering (the Gastroenterology Department is contacted) or patient with symptoms of uveitis flare during tapering (the Ophthalmology Department is contacted). If the patient develop enthesitis or dactylitis during tapering, these conditions are treated according to general guidelines with physiotherapy and/or steroid injection.

## **9.7. Interventions**

Participants will be randomised to one of two groups (2:1):

- Group 1: DOT, N = 120: dose optimisation of the biological therapy using an interactive patient-involving algorithm for disease activity guided dose reduction, i.e. stepwise increase of the dose interval until flare or discontinuation.
- Group 2: UC, N = 60: continuation of the biological therapy as usual care

## **9.8. Study drug**

The study drugs in this trial are the biological therapies: abatacept, adalimumab, certolizumab pegol, etanercept, golimumab, infliximab, and tocilizumab. Standard dose of the biological therapies for patients with RA, SpA and PsA are according to RADS (64–66):

- Abatacept (ABA):
  - Subcutaneous: 125 mg every week
  - Intravenous: weight < 60 kg: 500 mg every 4 weeks
  - Intravenous: weight 60-100 kg: 750 mg every 4 weeks
  - Intravenous: weight > 100 kg: 1000 mg every 4 weeks
- Adalimumab (ADA): 40 mg subcutaneous every 2 weeks
- Certolizumab pegol (CZP):
  - 200 mg subcutaneous every 2 weeks
  - 400 mg subcutaneous every 4 weeks
- Etanercept (ETN):
  - 25 mg subcutaneous twice per week
  - 50 mg subcutaneous every week
- Golimumab (GOL): 50 mg subcutaneous every 4 weeks
- Infliximab (IFX):
  - RA: 6 mg/kg intravenous every 8 weeks
  - PsA: 5 mg/kg intravenous every 8 weeks
  - SpA: 5 mg/kg intravenous every 6 weeks
- Tocilizumab (TCZ):
  - Subcutaneous: 162 mg every week
  - Intravenous: 8 mg/kg every 4 weeks

The biological therapies are all approved and are nationally and internationally an established part of the treatment of patients with RA, SpA and PsA, however abatacept and tocilizumab only have indication for RA according to RADS (64–66). Detailed information of the biological therapies used in this trial as regards to use, management and risk profile is described in the summary of product characteristics by the European Medicines Agency. In brief, the positive effect on arthritis activity in patients with RA, SpA and PsA is well-documented and serious adverse events are rare. The most serious risks are infection e.g. respiratory infection, cystitis or skin infection, however this risk is expected to be reduced during this trial for the patients who taper their biological therapy. If the patient develop an infection while on biological therapy, he/she will be treated according to local guidelines. The physician judge if the infection is severe and the biological therapy must be paused for a brief period and/or if the patient must be treated with antibiotics.

### **9.9. Drug accountability**

The biological therapies are all provided by the hospital pharmacy according to usual clinical practice in pre-filled syringes/pens (biological therapy in subcutaneous form) or pre-filled bottles (biological therapy in intravenous form). Skilled personnel will administer the intravenous agents at the trial sites in appropriately qualified intravenous infusion units. The biological drugs are all stored according to product-specific guidelines i.e. protected from light at 2°C-8°C. At the trial site, trained personnel will check the biological agents (study drug) for damage and verify proper identity and quantity as usual clinical practice. The trained personnel will also pack and label the biological agents used in this trial before administering it to participating patients (intravenous form) or handing it out to participating patients (subcutaneous form) (Appendix 18: labels for study drugs). Accurate and updated records of study drugs for the individual participant is registered by BATCH number in the patient's medical record and online medicine card (Fælles Medicin Kort (FMK)). The BATCH number of the biological therapy in intravenous form is registered when the drug is administered at the rheumatology outpatient clinic. The BATCH number of the biological therapy in subcutaneous form is registered when the drug is handed over to the patient at the rheumatology outpatient clinic.

The patient's individual online medicine card (FMK) lists all medications, which the patient is currently treated with. At baseline, the patient receive a copy of the FMK and a patient diary (Appendix 19) and is informed to write down any changes in medication between the visits in this trial. In the patient diary, the date and the dose administered will be recorded. The patient also register in the diary if the study drug (biological therapy) is paused outside of the trial visits e.g. because of severe infection or operation. The dosing records will be reviewed and verified for compliance at each visit by the research personnel at the trial site, and the investigator will retain all relevant dosing information. The participant will also receive a written instruction for the dose reduction of the biological therapy at baseline (Appendix 20) and this instruction will be reviewed at each clinical visit.

### **9.10. Dose optimisation tapering algorithm**

At present, there are no specific guidelines nationally or internationally for dose optimisation of biological therapy in patients with RA, SpA or PsA in sustained clinical remission. In DOT, the dose of the biological therapy is gradually reduced over 1 year by prolonging the dosing intervals using an algorithm. The dose optimisation tapering algorithm is used in order to minimize the risk of flare due to rapid dose reduction. The participating patients follows the algorithm as long as their arthritis is in

remission. Due to IFX is administered at longer dosing intervals than the remaining biological therapies, the dose optimisation tapering algorithm for IFX is different. Thus, patients tapering IFX prolong the dosing interval with 2 weeks at each infusion, see section 9.10.2. Dose optimisation tapering algorithm for IFX, and can discontinue IFX 44-52 weeks after baseline, if possible. Patients tapering one of the remaining biological therapies reduce dose with approximately 25% every 4 months at clinical visits in the Rheumatology Outpatient Clinic, thus the biological agent can be discontinued 52 weeks after baseline, if possible. The participants is as usual practice asked for symptoms of arthritis flare when receiving the intravenous/subcutaneous biological agent at the rheumatology outpatient clinic. Patients will receive the scheduled infusion/receive the subcutaneous biologics after research personnel secure a full DANBIO registration including PROMs, CRP, joint count for swollen and tender joints and for patients with SpA BASMI. The patient is booked for an extra clinical visit within 7 days as described in section 9.13. Patient-involvement.

#### 9.10.1. Dose optimisation tapering algorithm for ABA, ADA, CZP, ETN, GOL and TCZ

Figure 2: Outline of the algorithm for ABA, ADA, CZP, ETN, GOL and TCZ:

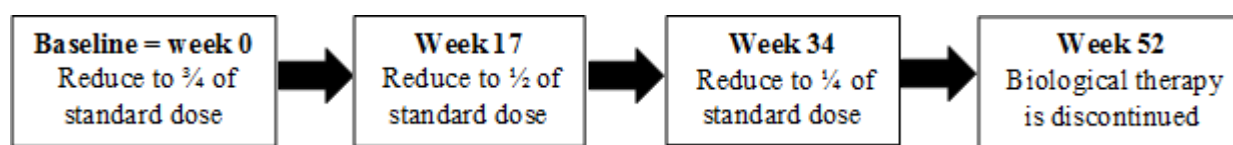

#### Dose optimisation/tapering algorithm for ABA, ADA, CZP, ETN, GOL and TCZ:

At baseline (week 0) the dose of the biological therapy is reduced as followed:

- Abatacept (ABA):
  - Subcutaneous: 125 mg every 10 days
  - Intravenous: weight < 60 kg: 500 mg every 6 weeks
  - Intravenous: weight 60-100 kg: 750 mg every 6 weeks
  - Intravenous: weight > 100 kg: 1000 mg every 6 weeks
- Adalimumab (ADA): 40 mg subcutaneous every 3 weeks
- Certolizumab pegol (CZP):
  - 200 mg subcutaneous every 3 weeks
  - 400 mg subcutaneous every 6 weeks
- Etanercept (ETN):

- 25 mg subcutaneous every 5 days
  - 50 mg subcutaneous every 10 days
- Golimumab (GOL): 50 mg subcutaneous every 6 weeks
- Tocilizumab (TCZ):
  - Subcutaneous: 162 mg every 10 days
  - Intravenous: 8 mg/kg every 6 weeks

At week 17, the dose of the biological therapy is reduced as followed, if possible:

- Abatacept (ABA):
  - Subcutaneous: 125 mg every 14 days
  - Intravenous: weight < 60 kg: 500 mg every 8 weeks
  - Intravenous: weight 60-100 kg: 750 mg every 8 weeks
  - Intravenous: weight > 100 kg: 1000 mg every 8 weeks
- Adalimumab (ADA): 40 mg subcutaneous every 4 weeks
- Certolizumab pegol (CZP):
  - 200 mg subcutaneous every 4 weeks
  - 400 mg subcutaneous every 8 weeks
- Etanercept (ETN):
  - 25 mg subcutaneous every week
  - 50 mg subcutaneous every 14 days
- Golimumab (GOL): 50 mg subcutaneous every 8 weeks
- Tocilizumab (TCZ):
  - Subcutaneous: 162 mg every 14 days
  - Intravenous: 8 mg/kg every 8 weeks

At week 34, the dose of the biological therapy is reduced as followed, if possible:

- Abatacept (ABA):
  - Subcutaneous: 125 mg every 21 days
  - Intravenous: weight < 60 kg: 500 mg every 10 weeks
  - Intravenous: weight 60-100 kg: 750 mg every 10 weeks
  - Intravenous: weight > 100 kg: 1000 mg every 10 weeks
- Adalimumab (ADA): 40 mg subcutaneous every 5 weeks
- Certolizumab pegol (CZP):
  - 200 mg subcutaneous every 5 weeks

- 400 mg subcutaneous every 10 weeks
- Etanercept (ETN):
  - 25 mg subcutaneous every 10 days
  - 50 mg subcutaneous every 21 days
- Golimumab (GOL): 50 mg subcutaneous every 10 weeks
- Tocilizumab (TCZ):
  - Subcutaneous: 162 mg every 21 days
  - Intravenous: 8 mg/kg every 10 weeks

At week 52, the biological therapies are discontinued, if possible.

### 9.10.2. Dose optimisation tapering algorithm for IFX

Figure 3: Outline for the algorithm for IFX:

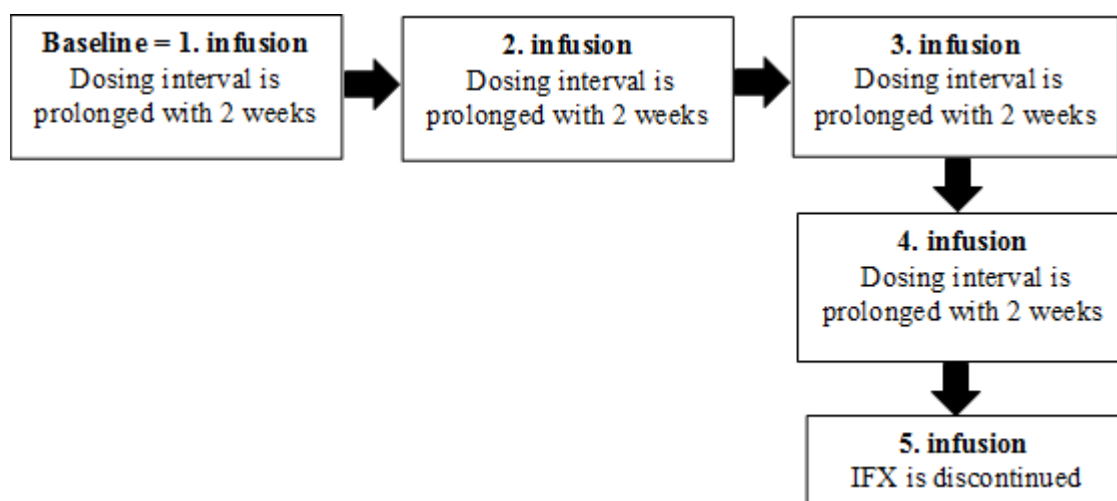

#### Dose optimisation tapering algorithm for IFX for patients with RA or PsA:

After the baseline visit, the following infusion administered to the patient is considered to be week 0 (first infusion):

- RA: infliximab (IFX) 3-6 mg/kg intravenous
- PsA: infliximab (IFX) 3-5 mg/kg intravenous

At week 10, the next infusion is given (second infusion):

- RA: infliximab (IFX) 3-6 mg/kg intravenous (10 weeks after last infusion)
- PsA: infliximab (IFX) 3-5 mg/kg intravenous (10 weeks after last infusion)

At week 22, the next infusion is given (third infusion):

- RA: infliximab (IFX) 3-6 mg/kg intravenous (12 weeks after last infusion)
- PsA: infliximab (IFX) 3-5 mg/kg intravenous (12 weeks after last infusion)

At week 36, the next infusion is given (fourth infusion):

- RA: infliximab (IFX) 3-6 mg/kg intravenous (14 weeks after last infusion)
- PsA: infliximab (IFX) 3-5 mg/kg intravenous (14 weeks after last infusion)

At week 52, IFX is discontinued, if possible (16 weeks after last infusion).

Dose optimisation/tapering algorithm for IFX for patients with SpA:

After the baseline visit, the following infusion administered to the patient at is considered to be week 0 (first infusion):

- SpA: infliximab (IFX) 3-5 mg/kg intravenous

At week 8, the next infusion is given (second infusion):

- SpA: infliximab (IFX) 3-5 mg/kg intravenous (8 weeks after last infusion)

At week 18, the next infusion is given (third infusion):

- SpA: infliximab (IFX) 3-5 mg/kg intravenous (10 weeks after last infusion)

At week 30, the next infusion is given (fourth infusion):

- SpA: infliximab (IFX) 3-5 mg/kg intravenous (12 weeks after last infusion)

At week 44, IFX is discontinued, if possible (14 weeks after last infusion).

**9.10.3. Patients in reduced-dose biological therapy prior to trial entry**

Patients in sustained clinical remission on reduced dose biological therapies (relative to standard dose as described above) are reduced to the nearest level at the first dose reduction at baseline. The dose of the biological therapy is thus reduced at baseline according to the following principles:

- The dose before tapering is  $> \frac{3}{4}$  of the standard dose but  $\leq$  full standard dose: the dose of the biological therapy is reduced at baseline to  $\frac{3}{4}$  of the standard dose
- The dose before tapering is  $> \frac{1}{2}$  of the standard dose but  $\leq \frac{3}{4}$  of the standard dose: the dose of the biological therapy is reduced at baseline to  $\frac{1}{2}$  of the standard dose
- The dose before tapering is  $> \frac{1}{4}$  of the standard dose but  $\leq \frac{1}{2}$  of the standard dose: the dose of the biological therapy is reduced at baseline to  $\frac{1}{4}$  of the standard dose
- The dose before tapering is  $\leq \frac{1}{4}$  of the standard dose: the biological therapy is discontinued at baseline

Thus, this patient group will reduce the dose of their biological therapy less at baseline compared to a patient receiving standard dose at baseline.

#### **9.10.4 Anti-drug antibodies and dose optimisation**

The formation of drug-neutralizing anti-drug antibodies (ADAb) is a concern when treating patients with biological agents because of the potentially risk of failure of the treatment. The risk of developing ADAb have been studied for anti-TNF- $\alpha$  with the highest risk for IFX and ADA and the lowest risk for ETN and GOL (81). Currently, only few studies have evaluated the risk of developing ADAb in patients treated with TCZ and ABA (82–84). To this date, the significance of ADAb in a patient receiving biological therapy is not fully understood. However, low drug levels of anti-TNF- $\alpha$  are generally associated with presence of ADAb among non-responders (81,85). It has been suggested, that low drug level of biologics could permit ADAb development and that high drug level could suppress ADAb development (81). Thus, this raise the possibility of increased ADAb development during tapering of biological therapy in patients in sustained clinical remission, thereby increasing the risk of secondary treatment failure. To this date however, no evidence supporting this hypothesis has been published. Recently one study examining tapering of ADA, ETN and IFX in patients with RA found presence of ADAb were infrequent and not a predictor for successful dose reduction or discontinuation (86). In this trial, ADAb and drug level of the biological agents is examined during tapering to further explore this topic.

#### **9.11. Pause of the biological therapy**

If the patient pause the biological therapy for over 3 months and are not willing to follow the dose optimisation tapering algorithm, the patient is discontinued from the trial due to lack of adherence. The pause of the biological agent can be one long pause lasting over 3 months or continuous pauses of a total value of over 3 months over 1 year. If the patient has an infection, the biological therapy should only be paused in the event of fever and need of antibiotic treatment judged by the physician. Thus, the biological therapy will not be paused by minor infections.

#### **9.12. Concomitant treatment**

At baseline, the patient's medicine incl. other arthritis treatments e.g. DMARD and Non Steroidal Anti-Inflammatory Drugs (NSAID) is recorded in the electronic Case Report Form (e-CRF) and in the FMK. DMARD includes MTX, salazopyrine, hydroxychloroquine or leflunomide. During the first 18 months of this trial, the dose of DMARD and NSAID recorded at baseline is maintained, except at the following circumstances:



- If the patient has side effects to DMARD or NSAID, the dose is reduced or the medication discontinued and the changes is registered in the e-CRF and FMK.
- If patients with SpA has symptoms of flare due to dose optimisation of the biological therapy, the physician can prescribe a short-term NSAID treatment of maximum 14 days concurrent with increasing dose of the biological therapy. This is recorded in the e-CRF and FMK. A short-term NSAID treatment of maximum 14 days is also allowed to treat flare caused by other reasons e.g. infection or surgery etc., as mentioned under section 9.6. Flare criteria.

Intra-articular steroid is allowed to treat flare due to dose optimisation of the biological therapy concurrent with increasing dose of the biological therapy. Intra-articular steroid is also allowed to treat flare caused by other reasons e.g. infection or surgery etc., as mentioned in section 9.6. Flare criteria.

### **9.13. Patient-involvement**

Collaboration between patients and professionals in developing and disseminating research projects is relatively new. This trial has included a patient research partner in the scientific process as recommended by EULAR and as presented previously (87,88). The patient research partner Kathrine Hyldig Hansen (KHH) contributed to refinement of the trial protocol and approved the final manuscript.

This trial use patient-involvement during the dose optimisation of the biological therapy. At baseline, the patients are educated about symptoms of flare and to contact his/her rheumatology outpatient clinic if such symptoms occur. Thus, the patients must be examined for arthritis activity by research personnel incl. DANBIO registration within 7 days after he/she have contacted the outpatient clinic. At this visit, the physician assess if the arthritis has flared or not and discuss continuing tapering with the patient as described under section 9.6. Flare criteria.

In this trial, additional PROMs are used to assess arthritis activity than normal clinical practise in Rheumatology in Denmark. This in order to assess as many aspects as possible of the patient's experience during tapering of the biological therapy. The physician use the PROMs to determine if the patient has a flare and treatment changes must be made.

### **9.14. Trial visits**

The trial procedures are listed in table 1A-1C below and described in detail in this section with exception of the collection of adverse events information, which is described in section 11. All trial data will be recorded in source documents and/or in the e-CRF.

#### **9.14.1. Baseline**

At baseline, the participants will receive adequate oral and written information about the trial and if he/she wishes to participate in the trial, the informed consent is signed. In addition, the participants will be screened to ensure they meet all inclusion criteria and none of the exclusion criteria. The participants then undergoes the following examinations depending on his/her disease:

- All participants: medical history, DANBIO registration and physical examination. In addition, blood test including biomarkers, see section 9.15.4 Laboratory tests. Radiological examinations are conducted in accordance with DRS guidelines for treatment change and not as part of this trial.
- Patients with RA: joint count 46 for swollen and tender joints
- Patients with SpA: joint count 66/68 for swollen and tender joints, BASDAI, BASFI and BASMI is registered together with registration of enthesitis by SPARCC, registration of dactylitis by number of affected fingers or toes, Psoriasis Area Severity Index (PASI) score for registration of skin involvement (Appendix 21) and modified Nail Psoriasis Severity Index (mNAPSI) score for registration of nail involvement (Appendix 22). The sacroiliitis degree judged by the New York criteria on radiographs of the sacroiliac joint is also registered. Radiological examinations and Magnetic Resonance Imaging (MRI) are conducted in accordance with DRS guidelines for treatment change and not as part of this trial.
- Patients with PsA: joint count 66/68 for swollen and tender joints, PASI score for registration of skin involvement, mNAPSI score for registration of nail involvement, SPARCC for registration of enthesitis and registration of dactylitis by number of affected fingers or toes. Radiological examinations are conducted in accordance with DRS guidelines for treatment change and not as part of this trial.

#### **9.14.2. Visit at 4, 8, 12, 24 and 60 month**

At the trial visits 4, 8, 12, 24 and 60 months from baseline, the participant undergoes the following examinations depending on his/her disease:

- All participants: DANBIO registration and blood test including serological test, see section 9.15.4 Laboratory tests.
- Patients with RA: joint count 46 for swollen and tender joints
- Patients with SpA: joint count 66/68 for swollen and tender joints, BASDAI, BASFI and

BASMI is registered together with registration of enthesitis by SPARCC, registration of dactylitis by number of affected fingers or toes, PASI score for registration of skin involvement and mNAPSI score for registration of nail involvement.

- Patients with PsA: joint count 66/68 for swollen and tender joints, PASI score for registration of skin involvement, mNAPSI score for registration of nail involvement, SPARCC for registration of enthesitis and registration of dactylitis by number of affected fingers or toes.

#### **9.14.3. Visit at 18 month**

At the trial visit 18 months from baseline, the participant undergoes the following examinations depending on his/her disease:

- All participants: DANBIO registration and blood test including serological test, see section 9.15.4 Laboratory tests. Radiological examinations are conducted in accordance with DRS guidelines for treatment change and not as part of this trial.
- Patients with RA: joint count 46 for swollen and tender joints
- Patients with SpA: joint count 66/68 for swollen and tender joints, BASDAI, BASFI and BASMI is registered together with registration of enthesitis by SPARCC and registration of dactylitis by number of affected fingers or toes, PASI score for registration of skin involvement and mNAPSI score for registration of nail involvement. MRI are conducted in accordance with DRS guidelines for treatment change and not as part of this trial.
- Patients with PsA: joint count 66/68 for swollen and tender joints, PASI score for registration of skin involvement, mNAPSI score for registration of nail involvement, SPARCC for registration of enthesitis and registration of dactylitis by number of affected fingers or toes.

#### **9.14.4. Extra visits**

All patients are instructed to contact the rheumatology outpatient clinic in case of symptoms of arthritis activity. In this case, research personnel must see the patient in the outpatient clinic to assessment of arthritis activity within 7 days.

#### **9.14.5. Early termination visit**

In case of early termination due to exclusion from the trial based on one of the safety measures or adverse events, see section 10. Harms and safety measures and 11. Adverse events, or at the patient's request, an early termination visit (ET) is offered. The ET must be completed within 2 weeks of the last dose of study drug (biological therapy), and preferably prior to the initiation of another therapy.

The ET is not conducted if the termination happens at one of the planned visits in this trial.

#### **9.14.6. Telephone follow up**

Patients who discontinue the trial early must be contacted by telephone 12 weeks after early termination for a telephone follow up (FU) to assessment of concomitant therapy and adverse events.

#### **9.14.7. Overview of trial procedures**

Trial procedures will be performed as summarized in the visit schedule presented in table 1A for patients with RA, table 1B for patient with SpA and table 1C for patients with PsA.

**Table 1A:** Trial procedures and outcome assessments for patients with RA:

|                                              | Baseline | 4 month<br>± 2 weeks | 8 month<br>± 2 weeks | 12 month<br>± 2 weeks | 18 month<br>± 2 weeks | 24 months<br>± 4 weeks | 60 month<br>± 4 weeks | Extra<br>visit | ET | FU ± 12<br>weeks <sup>1</sup> |
|----------------------------------------------|----------|----------------------|----------------------|-----------------------|-----------------------|------------------------|-----------------------|----------------|----|-------------------------------|
| Clinical visit                               | X        | X                    | X                    | X                     | X                     | X                      | X                     | X              | X  |                               |
| Inclusion and exclusion criteria             | X        |                      |                      |                       |                       |                        |                       |                |    |                               |
| Informed consent                             | X        |                      |                      |                       |                       |                        |                       |                |    |                               |
| Randomisation                                | X        |                      |                      |                       |                       |                        |                       |                |    |                               |
| Medical history                              | X        |                      |                      |                       |                       |                        |                       |                |    |                               |
| PROMs according to this protocol             | X        | X                    | X                    | X                     | X                     | X                      | X                     | X              | X  |                               |
| Height, weight, blood pressure and pulse     | X        |                      |                      |                       |                       |                        |                       |                |    |                               |
| Physical examination                         | X        |                      |                      |                       |                       |                        |                       |                |    |                               |
| 46 joint count for swollen and tender joints | X        | X                    | X                    | X                     | X                     | X                      | X                     | X              | X  |                               |
| Physician VAS for global disease activity    | X        | X                    | X                    | X                     | X                     | X                      | X                     | X              | X  |                               |
| Serum pregnancy test <sup>2</sup>            | X        |                      |                      |                       |                       |                        |                       |                |    |                               |
| CRP                                          | X        | X                    | X                    | X                     | X                     | X                      | X                     | X              | X  |                               |
| Haematology blood test                       | X        | X                    | X                    | X                     | X                     | X                      | X                     | X              | X  |                               |
| Serum creatinine, ALAT, BASP                 | X        | X                    | X                    | X                     | X                     | X                      | X                     | X              | X  |                               |
| IgM-RF, anti-CCP and ANA                     | X        |                      |                      |                       |                       |                        |                       |                |    |                               |
| Serum uric acid, TSH and vitamin D           | X        |                      |                      |                       |                       |                        |                       |                |    |                               |
| Cytokines                                    | X        | X                    | X                    | X                     | X                     | X                      | X                     |                | X  |                               |
| Druglevel and anti-drug-antibodies           | X        | X                    | X                    | X                     | X                     | X                      | X                     |                | X  |                               |
| Adverse events assessment                    | X        | X                    | X                    | X                     | X                     | X                      | X                     | X              | X  | X                             |
| Concomitant therapy assessment               | X        | X                    | X                    | X                     | X                     | X                      | X                     | X              | X  | X                             |
| Record of used/unused study drugs            | X        | X                    | X                    | X                     | X                     | X                      | X                     | X              | X  |                               |

ET: early termination. FU: telephone follow up.

<sup>1</sup>: Performed 12 weeks from end of trial visit ± 2 weeks

<sup>2</sup>: Performed on all women of childbearing potential

**Table 1B:** Trial procedures and outcome assessments for patients with SpA:

|                                                 | Baseline | 4 month<br>± 2 weeks | 8 month<br>± 2 weeks | 12 month<br>± 2 weeks | 18 month<br>± 2 weeks | 24 months<br>± 4 weeks | 60 months<br>± 4 weeks | Extra<br>visit | ET | FU ± 12<br>weeks <sup>1</sup> |
|-------------------------------------------------|----------|----------------------|----------------------|-----------------------|-----------------------|------------------------|------------------------|----------------|----|-------------------------------|
| Clinical visit                                  | X        | X                    | X                    | X                     | X                     | X                      | X                      | X              | X  |                               |
| Inclusion and exclusion criteria                | X        |                      |                      |                       |                       |                        |                        |                |    |                               |
| Informed consent                                | X        |                      |                      |                       |                       |                        |                        |                |    |                               |
| Randomisation                                   | X        |                      |                      |                       |                       |                        |                        |                |    |                               |
| Medical history                                 | X        |                      |                      |                       |                       |                        |                        |                |    |                               |
| PROMs according to this protocol                | X        | X                    | X                    | X                     | X                     | X                      | X                      | X              | X  |                               |
| Height, weight, blood pressure and pulse        | X        |                      |                      |                       |                       |                        |                        |                |    |                               |
| Physical examination                            | X        |                      |                      |                       |                       |                        |                        |                |    |                               |
| BASMI                                           | X        | X                    | X                    | X                     | X                     | X                      | X                      | X              | X  |                               |
| 66/68 joint count for swollen and tender joints | X        | X                    | X                    | X                     | X                     | X                      | X                      | X              | X  |                               |
| Physician VAS for global disease activity       | X        | X                    | X                    | X                     | X                     | X                      | X                      | X              | X  |                               |
| PASI score                                      | X        | X                    | X                    | X                     | X                     | X                      | X                      | X              | X  |                               |
| mNAPSI                                          | X        | X                    | X                    | X                     | X                     | X                      | X                      | X              | X  |                               |
| Enthesitis score by SPARCC                      | X        | X                    | X                    | X                     | X                     | X                      | X                      | X              | X  |                               |
| Dactylitis by number of fingers/toes            | X        | X                    | X                    | X                     | X                     | X                      | X                      | X              | X  |                               |
| Serum pregnancy test <sup>2</sup>               | X        |                      |                      |                       |                       |                        |                        |                |    |                               |
| CRP                                             | X        | X                    | X                    | X                     | X                     | X                      | X                      | X              | X  |                               |
| Haematology blood test                          | X        | X                    | X                    | X                     | X                     | X                      | X                      | X              | X  |                               |
| Serum creatinine, ALAT, BASP                    | X        | X                    | X                    | X                     | X                     | X                      | X                      | X              | X  |                               |
| HLA-B27 <sup>3</sup>                            | X        |                      |                      |                       |                       |                        |                        |                |    |                               |
| IgM-RF, anti-CCP and ANA <sup>4</sup>           | X        |                      |                      |                       |                       |                        |                        |                |    |                               |
| Serum uric acid, TSH and vitamin D              | X        |                      |                      |                       |                       |                        |                        |                |    |                               |
| Cytokines                                       | X        | X                    | X                    | X                     | X                     | X                      | X                      |                | X  |                               |
| Druglevel and anti-drug-antibodies              | X        | X                    | X                    | X                     | X                     | X                      | X                      |                | X  |                               |
| Adverse events assessment                       | X        | X                    | X                    | X                     | X                     | X                      | X                      | X              | X  | X                             |
| Concomitant therapy assessment                  | X        | X                    | X                    | X                     | X                     | X                      | X                      | X              | X  | X                             |
| Record of used/unused study drugs               | X        | X                    | X                    | X                     | X                     | X                      | X                      | X              | X  |                               |

ET: early termination. FU: telephone follow up.

<sup>1</sup>: Performed 12 weeks from end of trial visit ± 2 weeks

<sup>2</sup>: Preformed on all women of childbearing potential

<sup>3</sup>: If the test was performed earlier and the answer can be found in the medical journal; the test should not be repeated

<sup>4</sup>: Performed on patients with additional peripheral involvement

**Table 1C:** Trial procedures and outcome assessments for patients with PsA:

|                                                 | Baseline | 4 month<br>± 2 weeks | 8 month<br>± 2 weeks | 12 month<br>± 2 weeks | 18 month<br>± 2 weeks | 24 months<br>± 4 weeks | 60 months<br>± 4 weeks | Extra<br>visit | ET | FU = 12<br>weeks <sup>1</sup> |
|-------------------------------------------------|----------|----------------------|----------------------|-----------------------|-----------------------|------------------------|------------------------|----------------|----|-------------------------------|
| Clinical visit                                  | X        | X                    | X                    | X                     | X                     | X                      | X                      | X              | X  |                               |
| Inclusion and exclusion criteria                | X        |                      |                      |                       |                       |                        |                        |                |    |                               |
| Informed consent                                | X        |                      |                      |                       |                       |                        |                        |                |    |                               |
| Randomisation                                   | X        |                      |                      |                       |                       |                        |                        |                |    |                               |
| Medical history                                 | X        |                      |                      |                       |                       |                        |                        |                |    |                               |
| PROMs according to this protocol                | X        | X                    | X                    | X                     | X                     | X                      | X                      | X              | X  |                               |
| Height, weight, blood pressure and pulse        | X        |                      |                      |                       |                       |                        |                        |                |    |                               |
| Physical examination                            | X        |                      |                      |                       |                       |                        |                        |                |    |                               |
| 66/68 joint count for swollen and tender joints | X        | X                    | X                    | X                     | X                     | X                      | X                      | X              | X  |                               |
| Physician VAS for global disease activity       | X        | X                    | X                    | X                     | X                     | X                      | X                      | X              | X  |                               |
| PASI score                                      | X        | X                    | X                    | X                     | X                     | X                      | X                      | X              | X  |                               |
| mNAPSI                                          | X        | X                    | X                    | X                     | X                     | X                      | X                      | X              | X  |                               |
| Enthesitis score by SPARCC                      | X        | X                    | X                    | X                     | X                     | X                      | X                      | X              | X  |                               |
| Dactylitis by number of fingers/toes            | X        | X                    | X                    | X                     | X                     | X                      | X                      | X              | X  |                               |
| Serum pregnancy test <sup>1</sup>               | X        |                      |                      |                       |                       |                        |                        |                |    |                               |
| CRP                                             | X        | X                    | X                    | X                     | X                     | X                      | X                      | X              | X  |                               |
| Haematology blood test                          | X        | X                    | X                    | X                     | X                     | X                      | X                      | X              | X  |                               |
| Serum creatinine, ALAT, BASP                    | X        | X                    | X                    | X                     | X                     | X                      | X                      | X              | X  |                               |
| IgM-RF, anti-CCP and ANA                        | X        |                      |                      |                       |                       |                        |                        |                |    |                               |
| Serum uric acid, TSH and vitamin D              | X        |                      |                      |                       |                       |                        |                        |                |    |                               |
| Cytokines                                       | X        | X                    | X                    | X                     | X                     | X                      | X                      |                | X  |                               |
| Druglevel and anti-drug-antibodies              | X        | X                    | X                    | X                     | X                     | X                      | X                      |                | X  |                               |
| Adverse events assessment                       | X        | X                    | X                    | X                     | X                     | X                      | X                      | X              | X  | X                             |
| Concomitant therapy assessment                  | X        | X                    | X                    | X                     | X                     | X                      | X                      | X              | X  | X                             |
| Record of used/unused study drugs               | X        | X                    | X                    | X                     | X                     | X                      | X                      | X              | X  |                               |

ET: early termination. FU: telephone follow up.

<sup>1</sup>: Performed 12 weeks from end of trial visit ± 2 weeks

<sup>2</sup>: Performed on all women of childbearing potential

## **9.15. Clinical procedures**

### **9.15.1. Medical history**

At baseline, the patients' medical history will be recorded. Information about the following topics will be recorded:

- Predisposition for rheumatic disease, psoriasis and IBD
- Previous and current medical and surgical history
- Tobacco and alcohol consumption
- Social conditions: marital status (married/unmarried), education level and work life (working/flex job/pension/sick leave/other)
- Medication:
  - Biological therapy
  - DMARD
  - Glucocorticoid treatment within the last year
  - Consumption of NSAID and other analgesics
  - Consumption of other medication
- Duration of remission on current biological therapy
- Previously treatment with other biological therapies than the current one
- Previously attempt to reduce the dose of the biological therapy
- Adverse reactions to current medications including biological therapy and DMARD
- Current symptoms of arthritis activity including symptoms of extra-articular disease

The above information about the participants is recorded to get insight into the participant's arthritis including the biological therapy and side effects to this prior to entry into the trial. In addition, information about predisposition to rheumatic diseases, previous medical history, tobacco and alcohol consumption, medication and social conditions are recorded for the analysis of demographic characteristics of participants who can reduce dose of their biological therapy and maintain remission and participants who cannot. Information from the participant's medical record will be obtained as a supplement to information from the patient himself/herself.

### **9.15.2. Patient reported outcome measures**

In rheumatology, PROMs are used to gain insight into the patient's perception of arthritis activity, physical function etc. Prior to each visit at the rheumatology outpatient clinic in Denmark, the patients



fill out PROMs in the DANBIO database. In this trial, an additional PROM (Short Form Health Survey 36 (SF-36)) is used to assess the patients' health during tapering in order to highlight as many aspects as possible. The physician use the PROMs at each clinical visit to determine if the patient has a flare and treatment changes must be made. The PROMs included in this trial have all been published, validated and used for evaluating patients with RA, SpA and/or PsA. In this trial, the following PROMs are used:

- VAS: the left of the VAS scale (0 mm) signifies the absence of symptoms and the right end (100 mm) maximum activity in terms of the parameters assessed.
  - VAS Pain: the patient's assessment of pain within the last week on a 100 mm horizontal VAS scale (Appendix 4).
  - VAS Fatigue: the patient's assessment of fatigue within the last week on a 100 mm horizontal VAS scale (Appendix 4).
  - VAS Patient Global Health (PtGH): Patient's assessment: the patient's global assessment of disease activity (arthritis severity) within the last week on a 100 mm horizontal VAS scale (Appendix 4).
  - BASDAI: only used for patients with SpA. Consist of six questions regarding essential symptoms in axial arthritis on a 100 mm horizontal VAS scale (Appendix 6)
  - BASFI: only used for patients with SpA. Consist of ten questions regarding physical function on a 100 mm horizontal VAS scale (Appendix 7).
- HAQ-DI: assess the patient's physical function and consist of 20 questions regarding 8 different aspects of functional activities. Is answered by the patient on a scale from zero (no disability) to three (completely disabled) (Appendix 5).
- Short Form Health Survey 36 (SF-36): assess the patient's health and consist of 36 questions regarding 8 different aspects of health. The patient's answers is transformed into a score from 0 (maximum disability) to 100 (no disability) (Appendix 23).

### 9.15.3. Clinical assessments

In this trial, the following clinical assessments will be performed:

#### All patients:

- Physical examination is performed at baseline
- Height, weight and Body Mass Index is performed at baseline
- Blood pressure and pulse is measured at baseline

- Physician's global assessment of disease activity: the physician's global assessment of the patient's current disease activity on a 100 mm horizontal VAS scale is performed at each clinical visit (Appendix 24)

Patients with RA:

- 46 joint count for swollen and tender joints at each clinical visit (appendix 16)

Patients with PsA or SpA:

- 66/68 joint count for swollen and tender joints at each clinical visit (Appendix 17)
- Enthesitis score by SPARCC at each clinical visit (Appendix 14)
- Dactylitis count by number of affected fingers/toes
- PASI score for skin manifestation at each clinical visit (Appendix 21)
- mNAPSI score for nail manifestation at each clinical visit (Appendix 22)

Patients with SpA:

- BASMI at each clinical visit (Appendix 15)

#### **9.15.4. Laboratory tests**

The patients are as usual clinical practice monitored according to DRS guidelines with regular blood tests. In this trial, additional blood test are performed before each clinical visit as described below. The additional blood tests include biomarkers (drug level, anti-drug-antibodies and cytokines), which is examined to differentiate between patient who can taper the biological therapy successfully and patients who cannot. As drug level is measured when the concentration is lowest, i.e. just before the next dose of biological therapy, the blood tests are performed just before the next dose of biological therapy is administered prior to the clinical visit in the rheumatology outpatient clinic. That means:

- Patients treated with biological therapy in intravenous form: blood test are performed at the biochemistry department just before administration of the next intravenous dose of biological therapy at the rheumatology outpatient clinic. Thus the additional blood test does not require extra visits at the hospital for the patient.
- Patients treated with biological therapy in subcutaneous form: blood test are performed at the biochemistry department in connection to the patient pick up his/her biological agent at the rheumatology outpatient clinic. The visit is planned to just before the patients administer the next subcutaneous dose of biological therapy. Thus the additional blood test does not require extra visits at the hospital for the patient.

At the clinical visit, the physician notes the time of the previous and next administration of biological therapy.

All female patients with childbearing potential will undergo a serum pregnancy test (Human Chorion Gonadotropin test (B-hcg)) at screening as described in section 12. Pregnancy.

In this trial, blood sampling is performed by trained personnel at the biochemistry departments at the participating hospitals. At baseline 50 ml of blood is taken for analysis and at the remaining clinical visits 35 ml of blood is taken for analysis per visit. The patient should not be fasting for the blood tests. Routine analysis (all other analysis than biomarkers) will be analysed at the Departments of Biochemistry within a few days. Excess blood will be stored in the Danish Rheumatology Biobank for analysis of the biomarkers later on, see section 9.16. Biobank in the BIODOPT trial. In case of extra blood, this will also be stored in the biobank, see section 9.16. Biobank in the BIODOPT trial. Reference values for the blood tests mentioned below are the same at the four participating Rheumatology Departments.

Table 2: Overview of blood tests (including biomarkers)

| Blood tests                           | Biomarkers           |
|---------------------------------------|----------------------|
| CRP                                   | Cytokines            |
| Differentiated white blood cell count | Drug-level           |
| Haemoglobin                           | Anti-drug-antibodies |
| Platelets                             |                      |
| Creatinine                            |                      |
| ALAT and BASP                         |                      |
| Uric acid                             |                      |
| TSH                                   |                      |
| Vitamin D status                      |                      |
| B-hcg                                 |                      |
| ANA                                   |                      |
| IgM-RF                                |                      |
| Anti-CCP                              |                      |
| HLA-B27                               |                      |

#### **9.15.4.1. Baseline blood tests**

The baseline blood tests are performed just before administration of the next dose of biological therapy (as described above) after the baseline visit.

- All patients:
  - CRP
  - Haematology blood tests: haemoglobin, differentiated white blood cell count, platelets

- Creatinine, alanine transaminase (ALAT), alkaline phosphatase (BASP), uric acid, thyroid-stimulating hormone (TSH) and vitamin D status
- Biomarkers: cytokines, drug-level and anti-drug-antibodies
- Women of childbearing potential: B-hcg
- Patients with peripheral arthritis: IgM rheumatoid factor (IgM-RF), anti-cyclic citrullinated peptide (anti-CCP) antinuclear antibody (ANA)
- Patients with SpA: Human Leucocyte Antigen-B27 (HLA-B27) is performed if the test is not performed before or the result of a previous test cannot be found in the patient's medical record.

#### 9.15.4.2. Blood test visit 4, 8, 12, 18, 24 and 60 months

The blood test in connection to visit 4, 8, 12, 18, 24 and 60 months is performed just before administration of the next dose of biological therapy (as described above) prior to the clinical visit.

- All patients:
  - CRP
  - Haematology blood tests: haemoglobin, differentiated white blood cell count, platelets
  - Creatinine, ALAT and BASP
  - Biomarkers: cytokines, drug-level and anti-drug-antibodies

#### 9.15.4.3. Synovial fluid tests

Intra-articular steroid injection is only offered to the patient when the physician finds this necessary to treat a flare – and is thus not part of this trial. If synovial fluid is aspirated from the joint, this is analysed in accordance with local clinical practice, which may include the test listed in table 3. Reference values for the synovial fluid tests mentioned below are the same at the four participating Rheumatology Departments. Synovial fluid is not stored in the Danish Rheumatology Biobank.

Table 3: Synovial fluid tests – only done if synovial fluid is aspirated during arthrocentesis

| Synovial fluid test      |
|--------------------------|
| White blood cell count   |
| Susceptibility test      |
| Examination for crystals |

### **9.16. Biobank in the BIODOPT trial**

Participants will be asked for consent to store excess biological material (blood) in the Danish Rheumatology Biobank (Dansk Reuma Biobank), when signing the informed consent form. The purpose of storing biological material in the biobank is primarily to be able to repeat analyses if the first analyses of the samples has failed. In addition, some of the analyses are costly (the biomarkers), thus they are analysed together for more participants. Furthermore, the trial can raise new theories and questions that might be interesting to investigate later on. However, future studies will only be carried out after prior approval of the Danish Data Protection Agency and a new informed consent as a rule has been obtained. Moreover, the BIODOPT trial group has the right to the biological material in the Danish Rheumatology Biobank from this trial and thus, future studies will also need a prior approval of the BIODOPT trial group.

In addition, participants will be asked for a separate informed consent to store extra blood bank samples in the Danish Rheumatology Biobank. The purpose of this storage of extra biological material is future research purpose independent of this trial. At the baseline visit, the participants will be informed about the Danish Rheumatology Biobank and will receive the information material “Forskning til gavn for fremtidens patienter – Patientinformation om prøver i Regionernes Bio- og GenomBank” and “Samtykke til opbevaring af biologisk materiale i Regionernes Bio- og GenomBank” and “Dit væv, dit valg”.

The Danish Data Protection Agency has approved storage of excess and extra biologic material from this trial in the Danish Rheumatology Biobank approximately 25 ml blood at each visit. Samples for the biobank will be handled and prepared for storage by staff from the Danish Rheumatology Biobank and analysed in batches, then destroyed. The biological material will be stored at -80 °C in a freezer in the Danish Rheumatology Biobank under an ID-number, see section 14. Confidentiality.

### **9.17. Outcomes**

All outcome measurements in this trial have been published and validated and used in the evaluation of patients with RA, SpA and/or PsA. All clinical and laboratory procedures in this trial are standard and generally accepted.

#### **9.17.1. Primary outcome**

The co-primary endpoint is:

1A Superiority: The proportion of patients who at 18 months is reduced to 50% or less of their inclusion dose of biological therapy.

1B Equivalence: Disease activity assessed 18 months from baseline.

### **9.17.2. Key secondary outcomes**

At 18, 24 and 60 months: the proportion of patients in remission and receiving reduced dose biological therapy and the proportion of patients in remission despite discontinuation of biological therapy.

Changes from baseline to 4, 8, 12, 18, 24 and 60 months in the following composite scores:

- RA:
  - DAS28crp
  - Clinical Disease Activity Index (CDAI)
  - Simplified Disease Activity Index (SDAI)
- SpA:
  - ASDAS
  - BASDAI
- PsA:
  - DAPSA
  - DAS28crp
  - Minimal disease activity criteria (MDA)

Changes from baseline to 4, 8, 12, 18, 24 and 60 months in the following PROMs:

- All patients:
  - Patient's assessment of pain
  - Patient's assessment of fatigue
  - Patient's global assessment of disease activity
  - HAQ
  - SF-36
- Patients with SpA:
  - BASDAI
  - BASFI

Changes from baseline to 4, 8, 12, 18, 24 and 60 months in the following clinical assessment by the physician:

- All patients: the physician's global assessment of the patient's disease activity
- Joint count:
  - RA: 46 joint count for swollen and tender joints
  - SpA and PsA: 66/68 joint count for swollen and tender joints
- For patients with SpA
  - BASMI
- For patients with SpA or PsA:
  - PASI score
  - mNAPSI score
  - Enthesitis score by SPARCC
  - Dactylitis by number of affected fingers/toes

### **9.17.3 Tertiary (exploratory secondary) outcome**

Changes from baseline to 4, 8, 12, 18, 24 and 60 months in the following biomarkers:

- All patients: cytokines
- All patients: drug-level
- All patients: anti-drug-antibodies

The following laboratory test will be assessed in terms of possible predictive factors for successful dose optimisation of the biological therapy:

- All patients:
  - CRP at the start of biological therapy
  - CRP at baseline of this trial
- Patients with peripheral arthritis:
  - IgM-RF seropositivity
  - Anti-CCP seropositivity
- Patients with SpA:
  - Presence of HLA-B27 positivity

### **9.18. Power and sample size considerations**

1A: We assume that 30% of the patients allocated to DOT and 5% of patients allocated to the UC will meet primary endpoint 1A. These assumptions appear consistent with data from a newly published non-inferiority trial regarding dose optimisation of ADA and ETN in patients with RA (39),

where patients with RA treated with ADA or ETN and in DAS28crp LDA were included. For a comparison of two independent binomial proportions using Pearson's Chi-square statistic with a Chi-square approximation with a two-sided significance level of 0.05, a total sample size of 180 assuming an allocation ratio of 2 to 1 has a very high statistical power of 0.992 (99%) if the proportion of patients significantly reducing their biologics ( $\geq 50\%$  reduction), are 30% and 5%, respectively.

**1B:** For the between-group comparison, members of The BIODOPT trial group (SK, AS, EMH and LU) decided a predefined margin of equivalence at  $\pm 0.5$  DAS28crp points for patients with RA or PsA with peripheral arthritis and  $\pm 0.5$  ASDAS points for patients with SpA or PsA with axial arthritis. This margin was based on less than half of the effect that is considered a clinically relevant reduction in DAS28crp level ( $\Delta \text{DAS28crp} > 1.2$ ) or ASDAS level ( $\Delta \text{ASDAS} > 1.1$ ) corresponding to a clinically important improvement in arthritis activity. In a two one-sided test analysis for additive equivalence of two-sample normal means with bounds  $\pm 0.5$  for the mean difference and a significance level of 0.05, assuming a mean difference of 0 and a common standard deviation of 1.0, a total sample size of 180 participants assuming an allocation ratio of 2:1 yields a sufficient statistical power of 0.868 (87%).

Thus, inclusion of 180 patients in total during an inclusion period of 1 year is desired. First patient first visit (FPFV) is scheduled for 1<sup>st</sup> November 2017 and thus last patient first visit (LPFV) is scheduled for 1<sup>st</sup> November 2018. The trial lasts 5 years for each patient, who complete this trial, thus first patient last visit (FPLV) is scheduled for 1<sup>st</sup> November 2022 and last patient last visit (LPLV) for 1<sup>st</sup> November 2023.

## **9.19. Randomisation and group allocation**

### **9.19.1. Sequence generation**

All patients who fulfil the eligibility criteria and who provides written informed consent for participation will be enrolled and randomly allocated. A computer-generated randomisation sequence will be produced before any patients are enrolled, allocating participants in permuted blocks of 3 to 6. The randomisation sequence will be prepared by the senior biostatistician with no clinical involvement in the trial (RC). The sequence generation will be prepared with a 2:1 allocation ratio, stratified by trial site (Aalborg, Aarhus, Odense and Hjørring), diagnosis (i.e. RA, SpA or PsA) and repeated biologics failure (currently on biological agent number 3 or higher). We will use SAS PROC PLAN to generate the 24 mutually independent randomisation schedules (4 centres  $\times$  3 diagnoses  $\times$  2 biological agent “stages”); SAS statistical software (version 9.4.).



#### **9.19.2. Allocation concealment mechanism and implementation**

The allocation will be concealed in a password-protected computer file only accessible by the senior biostatistician (RC) and the independent data manager (JHW). The randomisation sequence will be entered into the e-CRF in REDCap by the data manager (JHW). The participants will be given their trial number and randomization group when the physician “clicks” on “the randomise button”, which will appear after finalising the baseline visit, depending on the stratum the patient represent. The randomization number and assigned intervention will then be visible on the screen. Thus, the patients are given consecutive screening and randomization numbers, independent of the trial site with concealed group allocation.

#### **9.19.4. Blinding**

The interventions in this trial are not blinded.

#### **9.20. Statistical methods**

All data analyses will be carried out according to a pre-established statistical analysis plan (SAP). All descriptive statistics and tests will be reported in accordance to the recommendations of the Enhancing the QUALity and Transparency Of health Research (EQUATOR) network (89): the CONSORT statement (90,91). In order to evaluate the empirical distributions of the continuous outcomes, visual inspection will be applied to suggest whether an assumption of normality (Gaussian distribution) is reasonable. All analyses will be conducted according to the intention-to-treat (ITT) principle; i.e., analysing participant outcomes according to the group to which they were randomised, even if some participants do not follow the DOT and UC algorithm.

All statistical analyses will be performed on blinded group allocations. Unblinding will be done after completion of all the pre-specified statistical analyses (according to the 18 months assessment). To evaluate the longitudinal effects of the intervention (DOT vs. UC during the 18 months trial period), all continuous outcome variables (e.g. disease activity [1B]) will be analysed using a multilevel repeated-measures linear mixed effects model, with participant as random effect factor based on a restricted maximum likelihood model. The model will include group (DOT vs UC), diagnosis, biologics failure history, and centre status as fixed effects, with the baseline value of the relevant variable as a covariate. To assess the adequacy of the linear models describing the observed data - and checking assumptions for the systematic and the random parts of the models — we will investigate the model

features via the predicted values and the residuals; that is, the residuals have to be normally distributed (around 0) and be independent of the predicted values.

For the equivalence analyses (e.g. according to disease activity), imputations will not be used to replace missing data in the primary analyses, but will be included in a sensitivity analysis to assess the effect of missing data. According to Piaggio et al (91), equivalence is declared if the entire 2-sided 95% CI is within the equivalence margin. Thus, a 2-sided 95% CI for the difference in disease activity at 18-months follow-up between groups will be derived from the repeated-measures mixed linear model and equivalence will be declared if the 95% CI of disease activity level is completely within the pre-specified equivalence range (−0.5 units to +0.5 units).

Categorical changes for dichotomous end points (e.g. number of participants who achieve a significant reduction in biologics [ $\geq 50\%$ ] while assessed after 18 months) will be analysed with the use of logistic regression with the same fixed effects and covariates as the respective analysis of covariance. For the superiority tests (e.g. co-primary endpoint 1A), we set the statistical significance at the conventional level of .05. Results will be expressed as estimates of the differences between groups, with 95% CIs to represent precision of the estimates. All analyses will be performed using commercially available statistical software.

## **9.21. Data management**

Data will be collected from the baseline visit until the end of the 60 months visit unless the patient is excluded from the trial or withdraw his/her consent, as described under section 9.23. Removal of participants from the trial.

This trial uses an e-CRF in REDCap where access to trial data is restricted to research members of the trial team by username and password. REDCap is a secure, web-based application for building and managing online databases and is designed to support data collection for research studies. REDCap use data logging to create an audit trail thereby registering e.g. who is looking at, changing or entering data. In the eCRF the following data will be entered: medical history, inclusion and exclusion criteria, informed consent, randomisation number, PROMs according to this protocol, physical examination incl. height, weight, BMI, blood pressure and pulse, 46 or 66/68 joint count for swollen and tender joints, BASMI, physician VAS for global disease activity, PASI score, mNAPSI, SPARCC score, number of dactylitis, CRP, serum pregnancy test at baseline, HLA-B27, IgM-RF, anti-CCP, AE, concomitant therapy and record of used/unused study drugs. In this trial, data quality will be promoted through the REDCap features real-time data entry validation (e.g. for dates and

range checks) and required data entry at each clinical visit. In addition, investigators at each trial site will review and update the e-CRF in REDCap to accuracy with date and signature when this is requested. The e-CRF in REDCap and source documents are available to research personnel in the BIODOPT trial at the respective trial site so they can enter data in the e-CRF as needed. Source documents are defined as original documents and records such as medical records including outpatient records, papers with assessment of swollen and tender joints, papers with vital parameters, laboratory results, medicine list including the participants' diary of medicine changes and dispensed biological therapy by BATCH number. PROMs entered by the patient in DANBIO as described in this protocol is also considered as source documents.

All trial-related information from this trial will be stored securely, see section 14. Confidentiality. All trial-related data will be identified by a coded ID number to maintain participant confidentiality, however, this does not apply for records that contain names or other personal identifiers, such as informed consent forms, which will be stored safely as described in section 14. Confidentiality. The code for the ID numbers will be stored safely in a locked file cabinet in areas with limited access away from all other trial-related data. The code for the ID numbers will be destroyed 15 years after the end of this trial. All biological material will be safely stored in the Danish Rheumatology Biobank as described in section 9.16 Biobank in the BIODOPT trial.

## **9.22. Participant retention**

Once a participant is enrolled and randomised, the trial site will make every reasonable effort to follow the participant for the entire trial period. It is estimated that the rate of dropout will be approximately 10%.

## **9.23. Removal of participants from the trial**

A participant may withdraw from the trial at any time. The investigator can discontinue any patient's participation for any reason, including an AE, safety concerns or failure to comply with the protocol. Participants will also be withdrawn from the trial if any of the following occur:

- Death
- Significant abnormal laboratory results or AEs, which rule out continuation of the study drug (biological therapy), as determined by the investigator
- Lack of adherence to the protocol
- If the patient pause the biological therapy for over 3 months and are not willing to follow the

dose optimisation tapering algorithm, the patient is discontinued from the trial due to lack of adherence. The pause of the biological therapy can be one long pause lasting over 3 months or continuous pauses of a total value of over 3 months over 1 year.

- Women who becomes pregnant while treated with biological therapy, MTX or leflunomide or within the period from last dose of these medications, where pregnancy is not recommended.
- If the flare is caused by dose reduction of the biological therapy, the patient must increase the dose of the biological therapy to the last dose at which the arthritis was in remission – otherwise the patient is excluded from the trial due to compliance-problems.

If a participant terminates the trial early, the procedures outlined for the ET visit must be completed. The date and reason for early termination will be recorded in the source document and/or in the e-CRF. Data collected from the participant is included in the trial until the date for early termination if the baseline visit has been completed. Participants who is excluded from the trial prematurely will be replaced by new participants and will be treated according to national guidelines by DRS and RADS.

#### **9.24. Discontinuation of the entire trial**

The sponsor-investigator, the principal investigators and the BIODOPT trial group may jointly proceed to discontinue the trial at any time if extreme circumstances would necessitate this e.g. extreme, unanticipated adverse events or extreme, unexpected difference in remission between the treatment groups. In addition, the Danish Medicine Agency and/or the local Ethics Committee can discontinue the trial at any time if this is found necessary.

### **10. HARMS AND SAFETY MEASURES**

In this trial, the patients with RA, SpA or PsA does not start treatment with new drugs, but instead participants in DOT reduce dose of already initiated biological therapy. During this trial, the patients in DOT may experience a flare due to dose reduction of the biological therapy. This is treated with rapid return to the previous dose of the biological therapy where the patient was in remission. Rapid intervention is important when treating a flare, therefore the patient is educated about symptoms of flare and to not hesitate to contact the rheumatology outpatient clinic. If the patient experience symptoms of flare, the research personnel must see him/her in the outpatient clinic to assessment of arthritis activity within 7 days. For the participants in UC, the risk of arthritis flare is considered unchanged compared with prior to entry in this trial.

The seven visits in this trial comprise approximately 1 hour per visit over 5 years. Patients will be closely monitored by frequent clinical visits, possible at slightly higher frequencies and with more intensive assessment compared to usual care. This ensures that any symptoms of flare is detected so that relevant medical examination and treatment changes can be conducted.

Participation in this trial can have impact on the patients travel insurance for the patients in DOT as the dose of the biological therapy is changed (reduced). At baseline the patient is thus informed about this aspect and is advised to contact their travel insurance agency long before a scheduled travel to clarify whether the patient is covered by his/her travel insurance. Participation in this trial is not expected to have an impact on travel insurance for the patients in UC.

Additional harms for the participants in this trial are discomfort and risk of a small hematoma in the skin during blood sampling or arthrocentesis. In addition, there is a very small risk of infection due to penetration of the skin with a needle. The patient is informed of these risks at baseline. To minimize these risks, the site of needle penetration is disinfected with alcohol prior to blood sampling or arthrocentesis. Arthrocentesis is performed under sterile conditions according to procedure for minor surgical procedures and performed by an experienced physician only if this is necessary judged by the physician – thus arthrocentesis is not part of this trial. Blood sampling is done by experienced bioanalysts and in connection to a visit in the rheumatology outpatient clinic. This to avoid more transportation to the hospital than necessary.

After the end of the trial participants will be treated according to national guidelines by DRS and RADS. There are no risk associated with the remaining part of this trial, although unforeseen risks or harms can occur. Participation in this trial has thus minimal risks, which are offset by the benefits.

The trial is expected to contribute with new knowledge about dose optimisation of biological therapy in patients with RA, SpA and PsA in sustained clinical remission and thus to positively benefit the individual patient and the society.

## **11. ADVERSE EVENTS**

An adverse event (AE) is defined as any untoward medical occurrence in a patient or clinical investigation participants administered a pharmaceutical product and which does not necessarily have a causal relationship with the treatment. The principal investigators will monitor each patient for clinical and laboratory evidence of AE at each clinical visit throughout the trial. The investigators will assess and register any AE in detail including date of onset, description, severity, duration, outcome, relationship to study drug and any actions taken. All AE in this trial will be registered regardless of

how the research personnel become aware of it e.g. in response to a query, observed by site personnel or reported spontaneously by the patient. All AE reported from baseline to the end of this trial will be registered and followed to a satisfactory conclusion. Any worsening of a pre-existing condition, excluding RA, SpA and PsA, is considered an AE. Laboratory abnormalities are only an AE if they result in discontinuation from the trial, necessitate therapeutic medical intervention and/or if the investigator considers them an AE. A treatment-related AE is in this trial defined as any AE reported by the participants with onset or worsening from baseline until 5 half-lives after discontinuation of the study drug. An elective surgery/procedure is not considered an AE if the surgery/procedure is performed for a pre-existing condition and the surgery/procedure has been pre-planned prior to trial entry. However, it is considered an AE if the pre-existing condition unexpectedly worsens during the trial period and e.g. causes surgery to take place earlier than planned. The investigators will use the following definitions to rate the severity of an AE:

- Mild: the AE is transient and easily tolerated by the participant
- Moderate: the AE causes the participant discomfort and interrupts the participant's usual activities
- Severe: the AE causes considerable interference with the participant's usual activities and may be incapacitating or life-threatening

The investigators will use the following definitions to assess the relationship of an AE to the use of a study drug:

- Probably related: an AE that has a strong temporal relationship to the study drug or recurs in rechallenge and other aetiology is unlikely or significantly less likely
- Probably not related: an AE that has little or no temporal relationship to the study drug and/or a more likely alternative aetiology exists.
- Not related: an AE that is caused by an underlying or concurrent illness or effect of another drug and is not related to the study drug

A serious adverse event (SAE) and serious adverse reaction (SAR) is defined as an event or side effect that, irrespective of dose, results in death, is life threatening, causes hospitalization or prolongation of a hospital stay, results in significant or permanent invalidity or incapacity or leads to congenital abnormality or malformation. All SAE/SAR reported from baseline to the end of this trial will be registered and followed to a satisfactory conclusion. The investigators must report any SAE or SAR to the BIODOPT trial group within 24 hours of the site being made aware of the SAE/SAR.

This is done by e-mailing the SAE forms (Appendix 25) to the sponsor-investigator (SK) and coordinating investigator (LU). The coordinating investigator (LU) will ensure that sponsor-investigator (SK) is notified about all SAE/SAR.

A SAR can be a suspected unexpected serious adverse reaction (SUSAR), which is defined as a serious side effect that may or may not be dose related, but is unexpected, as it is not consistent with current information. If the BIODOPT trial group judge that a SAE/SAR is a SUSAR, SK and LU are responsible for reporting it to the medical products agency, the local ethics committee and to the Danish Medicines Agency. A SUSAR that is life threatening must be reported to the Danish Medicines Agency and the local Ethics Committee within 7 days, if not life threatening within 15 days. The sponsor-investigator (SK) and the coordinating investigator (LU) are responsible for informing the principal investigators of any SUSARs.

The section “adverse reactions” in the product information of the biological therapies are used as referral documents for assessment of adverse events or adverse reactions in this trial.

## **12. PREGNANCY**

At present, treatment with biological therapy is not permitted during pregnancy attempt for women and is not permitted in pregnant women or breastfeeding women. These rules also applies to patients treated with MTX or leflunomide for both men and women during pregnancy attempt. In this trial, female participants must use safe contraception like any other patient treated with biological therapy, MTX and/or leflunomide. The following methods of contraception are considered safe in this trial:

- IUD
- Hormonal contraception i.e. birth control pills, birth control implants, birth control patch, birth control vaginal ring or birth control shot (depot injection)
- A vasectomized partner

In accordance with the product information of the biological therapies, female participants must use safe contraception as described above for the following periods after discontinuation of their biological therapy:

- Abatacept: 3.5 months
- Adalimumab: 5 months
- Certolizumab pegol: 5 months
- Etanercept: 3 months
- Golimumab: 6 months

- Infliximab: 6 months
- Tocilizumab: 3 months

Safe contraception must be used 6 months after the last dose of MTX and up to 2 years after the last dose of leflunomide, however, patients treated with leflunomide can undergo a wash-out period after local guidelines. The BIODOPT trial group must be contacted within one working day after research personnel learns that a female trial participant has become pregnant during the trial or within the time period listed above for the different biological therapies. Female participants who become pregnant during the trial will have their study drug (biological therapy) discontinued if the pregnancy is proceeded. Data regarding the outcome of any pregnancy in at female trial participant treated with the study drugs will be collected. The medical outcome of an induced or a spontaneous abortion is considered a SAE and must be reported to the BIODOPT trial group within 24 hours of learning of the event.

## **13. ETHICS**

### **13.1. Ethical consideration**

In this trial, the participants does not start treatment with new drugs, but instead dose of the biological therapy is reduced in DOT and remained unchanged in UC. Prior studies have found no considerable adverse events when tapering biological therapy in patients with RA, PsA or SpA in sustained clinical remission as a flare is treated successfully when escalating to full dose biological therapy in most patients (37,41,42,46,48,92–94) – however, in a smaller proportion of patients switching to a different biological agent can be necessary to gain remission after a flare (38,41,46,93). Participants will be educated about symptoms of arthritis flare at baseline and will be closely monitored for arthritis activity every 4 month during the first year of the trial (the period of dose optimisation in DOT). Arthritis flare will be treated as described in this protocol, see section 9.6. Flare criteria. Continuation of standard dose biological therapy in patients in sustained clinical remission can lead to overtreatment and thus unnecessary side effects e.g. common and serious infections. Therefore it is expected, that DOT will have a smaller risk of side effects incl. infections and that UC will have an unchanged risk of side effects incl. infection. For the individual patient however, there is no guaranteed benefits for participating in this trial other than extra close monitoring of their arthritis due to extra visits at the outpatient clinic.

The amount of blood taken during the trial is 260 ml divided into 7 visits, which is considered acceptable for the participants. There are no risk associated with the remaining part of this trial, although



unforeseen risks or harms can occur. This trial is expected to contribute with new knowledge about dose optimisation of biological therapy in patients with RA, SpA and PsA in sustained clinical remission and thus to positively benefit the individual patient and the society. In light of the above, we consider it ethically justifiable to conduct the trial. This trial is conducted in accordance with the Helsinki Declaration and was initiated by the BIODOPT trial group – no pharmaceutical companies are involved and there are no conflicts of interest. This protocol and all its appendix' is submitted for approval to the local Ethics Committee for the Region of Northern Jutland and the Danish Medicines Agency. The trial has been reported to the Danish Data Protection Agency through the Regions joint notification system (Regionernes fælles paraplyanmeldelse) and EudraCT. The trial will be registered at EudraCT before start of participant enrolment. This trial will be conducted in compliance with the protocol, GCP and all other applicable regulatory requirements. The trial is monitored by the local Danish GCP units for Aarhus, Aalborg and Odense University Hospitals. If the trial is completed before time or suspended, the BIODOPT trial group will inform the local Ethics Committee and the reason for the termination/suspension will be notified. After the end of this trial, the investigators will inform the participants about the results and conclusions of the trial.

### **13.2 Recruitment procedures**

Participants will be recruited at a routine visit at the four Rheumatology outpatient clinics or upon request for participation by a letter, see below. In the outpatient clinics, information material for physicians regarding this trial and referral of possible participant to the investigator will be found (Informationsmateriale til læger på reumatologisk afdeling). When a potential participant has expressed interest in the trial, the investigator is notified and will contact the possible participant as soon as possible to arrange a visit in the outpatient clinic within 7 days for further information. The potential participant receives the Participant Information per e-boks or mail before the scheduled visit in the outpatient clinic. A possible participant can also be recruited upon request for participation by a letter per e-boks or mail (Brev til mulige forsøgspartagere). The possible participant will also receive the Participant Information with the letter. The possible participant is requested to contact his/her Rheumatology outpatient clinic if he/she wishes to participate in the trial. If the investigator has not heard from the possible participant within 1 month, the investigator will contact the possible participant by telephone and provide oral information about the trial. If the patient wishes to participate in the trial, a visit in the outpatient clinic is scheduled within 7 days.

At baseline, the informed consent is received as described below, see section 13.2. Informed consent, and the participant is included, randomised and examined as described in this protocol before the first dose reduction of the biological therapy. The patients will be treated and monitored according to the procedures specified in this protocol by the investigators during this trial. If during this trial circumstances are detected, that require further investigation and/or treatment for the individual patient, the patient will be informed if permission is given on the informed consent form.

All participants are given the name and telephone number to the trial nurse and local investigator in case of any questions. In addition, the participants receive the pamphlets “Forsøgspersoners rettigheder i et sundhedsvidenskabeligt forskningsprojekt” and “Før du beslutter dig” from the Danish National Ethics Committee.

### **13.3. Informed consent**

At the scheduled visit in the outpatient clinic, the potential participant will be given verbal and written information about the trial by the investigator before inclusion. The investigators must provide complete and sufficient verbal and written information, in uninterrupted surroundings, about the trial including potential harms to the participant and answer any questions concerning the trial. The potential participant is informed about participation being voluntary and of his/her right to at least 24 hours to reflection before the informed consent is given. In addition, the participant is informed about his/her right to bring a relative or friend to receive information about the trial and to discuss any questions. The participants are also informed of their right to withdraw consent at any time without a specific reason. The participant is asked to fill out the informed consent form and a separate consent form regarding storage of extra biological material in the Danish Rheumatology Biobank for later analysis if he/she wishes to participate in the trial. If the participant wishes to participate in the trial, fulfil the inclusion criteria and none of the exclusion criteria and has signed the two informed consents, he/she is included in the trial. The informed consent will be signed and dated by the participant and the investigator who administered the informed consent. A copy of the informed consent form will be given to the participant and the original will be placed in the trial master file (TMF). In the source documents (e.g. the patient's medical record), it is stated that the informed consent was obtained prior to any trial-related procedures and that the participant received a signed copy.

#### **14. CONFIDENTIALITY**

In this trial, information regarding previous medical history and treatment will be passed on from the participant and/or his/her medical record. This information is used together with other source data to identify possible prognostic factors for successful tapering of the biological therapy. All trial-related information will be stored securely at the trial sites. All trial-related data will be identified by a coded ID number to maintain participant confidentiality, however, this does not apply for records that contain names or other personal identifiers, such as informed consent forms, which will be stored with the TMF in locked file cabinets in areas with limited access, thus away from trial records identified by ID number. The code for the ID numbers is stored safely in another locked file cabinet in areas with limited access away from all other trial-related data. Access to the e-CRF in this trial (REDCap) will be excluded to the research personnel at the trial site, however the sponsor-investigator and the coordinating investigator will have access to e-CRF for all trial sites. The REDCap database meets current data security requirements because of data logging, which create an audit trail as explained in section 9.21. Data management. All trial-related data may under no circumstances be made available to a third party with the exception of authorized representatives of the relevant health or regulatory authorities, e.g. the Ethics Committee and/or the Danish Medicines Agency, as well as the trial monitor, e.g. GCP units. This trial will comply with The Danish laws regarding patient confidentiality (Lov om behandling af personoplysninger og Sundhedsloven) and is reported to the Danish Data Protection Agency through the Regions joint notification system (Regionernes fælles paraply-anmeldelse). Data will be destroyed 15 years after the end of this trial. The local Ethics Committee will receive information within 90 days after completion of this trial and a report 1 year after the end of the trial.

#### **15. MONITORING**

This trial is conducted in accordance with the protocol, the ICH-GCP guideline and applicable regulations and legislations in this area. The ethical principles from the Declaration of Helsinki will be followed. Applicable procedures for quality control and quality assurance will be followed in this trial. The sponsor-investigator SK are responsible for monitoring the trial after the GCP principles. This trial is submitted to the Danish Data Protection Agency, the Danish Medicines Agency and the local Ethics Committee and are monitored by the local Danish GCP units at Aarhus, Aalborg and Odense University Hospitals.

This trial uses an electronic e-CRF in REDCap. Investigators at each trial site will review and update the e-CRF to accuracy with date and signature when this is requested. The e-CRF and source documents are available to research personnel in the BIODOPT trial at the respective trial site, so they can enter data in the e-CRF as needed. The investigators will ensure that all source data will be available for monitoring, auditing and inspection by the GCP unit, the Danish Medicines Agency and other health authorities. All original informed consent forms, copies of all e-CRFs and detailed records of medical disposition will be stored safely and destroyed after 15 years.

## **16. COMPENSATION AND INSURANCE**

Trial participants will not be financially reimbursed in this trial. The general insurance of patients and the “Lov om klage- og erstatningsadgang inden for sundhedsvæsenet” apply to all participants. The participants will be informed of this at baseline by vocal and written information provided by the investigator.

Research personnel including investigators will not be financially reimbursed for enrolling participants in this trial. The members of the BIODOPT trial group are covered by the statutory insurance of the hospital.

## **17. PROTOCOL AMENDMENTS**

Any modifications to the protocol, which may affect the conduct of the trial, potential benefit of the patient or may affect patient safety, including changes of trial objectives, trial design, patient population, sample size, trial procedures or significant administrative aspects will require a formal amendment to the protocol. Such amendment must be agreed upon by the BIODOPT trial group, approved by the local Ethics Committee prior to implementation and notified to the Danish Medicines Agency in accordance with applicable regulations. Administrative changes of the protocol are minor corrections and/or clarifications that have no effect on the way the trial is conducted. These administrative changes will be agreed upon by the BIODOPT trial group and will be documented in a memorandum. The local Ethics Committee may be notified of administrative changes at the discretion of the BIODOPT trial group.

## **18. DECLARATION OF INTEREST**

None of the investigators has conflict of interest regarding the conduct of this trial. The trial is partly funded by donations from the Danish Regions (Regionernes Medicinpulje) and the Health Science

Research Fund of the Region of Northern Jutland (Region Nordjyllands Sundhedsvidenskabelige Forskningsfond) and the Department of Rheumatology at Aalborg University Hospital, see section 20. Budget. Pharmaceutical companies are not involved in this trial and do not provide financial support.

## **19. DISSEMINATION POLICY**

### **19.1. Dissemination from the coordinating investigator to the sponsor**

Throughout the trial period, the PhD student and coordinating investigator LU is required to keep the sponsor-investigator (SK) verbally as well as written informed of the conduct of this trial including all SAE and SAR.

### **19.2. Dissemination to health and regulatory authorities**

Once a year during the trial period the coordinating investigator (LU) will report a summary of SAEs and SARs together with a report on participants' safety to the local Ethics Committee and the Danish Medicines Agency.

### **19.3. Dissemination of trial results**

All results of this trial will be reported; preferably in English-language peer reviewed medical journals as well as presented at international congresses. Both negative, inconclusive and positive research results will be reported regardless of publication in a medical journal or not. Members of the BIODOPT trial group will be co-authors of all publications from the BIODOPT trial. Line Uhrenholt will be first author, Annette Schlemmer, Ellen-Margrethe Hauge and Robin Christensen will be co-authors and Salome Kristensen will be last author. Other authors will be dependent on the contributions. The site investigator will be qualified as co-authors of the main publication if 10 patients complete the trial, if 20 patients complete the trial the site will be qualified for 2 co-authorships on the main publication. The entire team of researchers will be mentioned in the author list as "and the BIODOPT trial group". Spin-off projects must be approved by the BIODOPT trial group in advance and will be co-authored by the BIODOPT trial group, the spin-off project group and others that have contributed markedly. In case of dispute, the BIODOPT trial group will resolve authorship issues. The Vancouver rules for authorship will be followed.

## 20. BUDGET

This trial is investigator-initiated and partly funded by donations from the Danish Regions (Regionernes Medicinpulje) (2.821.500 dkr.) and from the Health Science Research Fund of the Region of Northern Jutland (80.000 dkr.) and the Department of Rheumatology Aalborg University Hospital (322.875 dkr). The funding source had no role in the design of this trial and will not have any role during its execution, analyses, interpretation of the data, or decision to submit results. Coordinating investigator (LU) will seek additional funding for the expenses of the trial from private foundations. Upon receipt of funds, the amount is paid to a research account belonging to the Rheumatology Department at Aalborg University Hospital with reference to the title of the PhD-project. The BIODOPT trial group will use excess funding for future research within the same participant area.

Pharmaceutical companies are not involved in the trial and do not provide financial support. However, the Musculoskeletal Statistics Unit at Parker Institute, Bispebjerg and Frederiksberg Hospital, is supported by core grant OCAY-13-309 from the Oak Foundation.

### Budget:

| <b>Budget for the BIODOPT-trial</b>                                                                    | <b>Cost</b>           |
|--------------------------------------------------------------------------------------------------------|-----------------------|
| Pay for PhD student LU for 6 months – the Rheumatology Department Aalborg University Hospital          | 322.875 dkr.          |
| Pay for PhD student LU for 24 months – the Danish Regions                                              | 1.291.500 dkr.        |
| Pay for PhD student LU for 1,5 months – Health Science Research Fund of the Region of Northern Jutland | 80.000 dkr.           |
| Pay for PhD student LU for 4,5 months – not financed yet                                               | 257.292 dkr.          |
| Bio analysts – the Danish Regions                                                                      | 210.000 dkr.          |
| Research nurse – the Rheumatology Department Aalborg University Hospital                               | 349.600 dkr.          |
| Blood tests: drug-level and anti-drug-antibody – the Danish Regions                                    | 800.000 dkr.          |
| Blood tests: cytokines – the Danish Regions                                                            | 400.000 dkr.          |
| Publication expenses – the Danish Regions                                                              | 20.000 dkr.           |
| Statistical assistance, creation of “window” in DANBIO – the Danish Regions                            | 100.000 dkr.          |
| <b>Sum</b>                                                                                             | <b>3.831.267 dkr.</b> |

## 21. TIME SCHEDULE

The screening period will start after relevant authorities approve this protocol. The screening period is scheduled to start November 2017 and last 1 year. The dose optimisation period is 12 months long starting from the participant’s baseline. Follow up will be 5 years as described in this protocol.

## **22. FEASIBILITY OF THE TRIAL**

The necessary facilities and expertise for implementation of this trial is present at the four Rheumatology Departments. Blood sampling are carried out by the Clinical Biochemistry Department associated with the four Rheumatology Departments, some blood samples are stored in the Danish Rheumatology Biobank as described in this protocol. The visits in this trial is part of the participants' usual outpatient control. The participants are registered in DANBIO at each visit as done at usual outpatient visits. Each visit in the outpatient clinic lasts approximately 1 hour. The patient receives the appointment for his/her next visit in the rheumatology outpatient clinic by electronic mail (e-boks)/by mail as usual. PhD Student LU is the coordinating investigator and responsible for the practical implementation of the trial, which is expected to be included in a PhD thesis.

### **23. INVESTIGATORS AND SPONSORS AGREEMENT**

I have read this protocol and agree that the trial is ethical. I agree to conduct the trial as outlined and in accordance with all applicable regulations and guidelines. I agree to maintain the confidentiality of all information received or developed in connection with this protocol.

---

Date, name and signature from Principal Investigator and sponsor Salome Kristensen

---

Date, name and signature from Coordinating Investigator Line Uhrenholt

---

Date, name and signature from Principal Investigator at trial site



## 24. REFERENCES

1. Dansk Reumatologisk Selskab. Dansk Reumatologisk Selskabs kliniske retningslinje for klassifikation, diagnostik, behandling og monitorering af reumatoid artrit (RA) [Internet]. 2012 [cited 2017 Feb 28]. Available from: [http://danskreumatologiskselskab.dk/fileadmin/DRS/kliniskeretningslinjer/Dansk\\_Reumatologisk\\_Selskabs\\_Kliniske\\_Retningslinje\\_for\\_Diagnostik\\_Klassifikation\\_Behandling\\_og\\_Monitorering\\_af\\_Reumatoid\\_Artrit\\_revideret\\_september\\_2012\\_PDF\\_kopi\\_.pdf](http://danskreumatologiskselskab.dk/fileadmin/DRS/kliniskeretningslinjer/Dansk_Reumatologisk_Selskabs_Kliniske_Retningslinje_for_Diagnostik_Klassifikation_Behandling_og_Monitorering_af_Reumatoid_Artrit_revideret_september_2012_PDF_kopi_.pdf)
2. Sundhed.dk. Spondylartropatier hos voksne - Lægehåndbogen på sundhed.dk [Internet]. [cited 2017 Feb 18]. Available from: <https://www.sundhed.dk/sundhedsfaglig/laegehaandbogen/reumatologi/tilstande-og-sygdomme/artritter/spondylartropatier-hos-voksne/>
3. Dansk Reumatologisk Selskab. Dansk Reumatologisk Selskabs Kliniske Retningslinje for Aksial Spondylarthritis [Internet]. 2013 [cited 2017 Feb 18]. Available from: [http://danskreumatologiskselskab.dk/fileadmin/DRS/kliniskeretningslinjer/SpA\\_retningslinje\\_DRS.pdf](http://danskreumatologiskselskab.dk/fileadmin/DRS/kliniskeretningslinjer/SpA_retningslinje_DRS.pdf)
4. Sundhed.dk. Psoriasisartrit - Lægehåndbogen på sundhed.dk [Internet]. 2014-08-07. [cited 2017 Feb 17]. Available from: <https://www.sundhed.dk/sundhedsfaglig/laegehaandbogen/reumatologi/tilstande-og-sygdomme/artritter/psoriasisartrit/>
5. Dansk Reumatologisk Selskab. Dansk Reumatologisk Selskabs Kliniske Retningslinje for Psoriasisartrit [Internet]. 2014 [cited 2017 Feb 17]. Available from: [http://danskreumatologiskselskab.dk/fileadmin/DRS/kliniskeretningslinjer/PsA\\_retningslinje\\_29\\_10\\_2014\\_PDF.pdf](http://danskreumatologiskselskab.dk/fileadmin/DRS/kliniskeretningslinjer/PsA_retningslinje_29_10_2014_PDF.pdf)
6. Grigor C, Capell H, Stirling A, McMahon A, Lock P, Vallance R. Effect of a treatment strategy of tight control for rheumatoid arthritis (the TICORA study): a single blind randomised controlled trial. *Lancet*. 2004;364:263–9.
7. Goekoop-Ruiterman YPM, de Vries-Bouwstra JK, Kerstens PJSM, Nielen MMJ, Vos K, van Schaardenburg D, et al. DAS-driven therapy versus routine care in patients with recent-onset active rheumatoid arthritis. *Ann Rheum Dis*. 2010;69:65–9.
8. Schipper LG, Vermeer M, Kuper HH, Hoekstra MO, Haagsma CJ, Broeder AA Den, et al. A Tight Control Treatment Strategy Aiming for Remission in Early Rheumatoid Arthritis Is More Effective than Usual Care Treatment in Daily Clinical Practice: A Study of Two Cohorts in the Dutch Rheumatoid Arthritis Monitoring Registry. *Ann Rheum Dis*. 2012;71:845–50.
9. Vermeer M, Kievit W, Kuper HH, Braakman-Jansen LM a, Bernelot Moens HJ, Zijlstra TR, et al. Treating to the target of remission in early rheumatoid arthritis is cost-effective: results of the DREAM registry. *BMC Musculoskelet Disord*. 2013;14:1–9.
10. Soubrier M, Lukas C, Sibilia J, Fautrel B, Roux F, Gossec L, et al. Disease activity score-driven therapy versus routine care in patients with recent-onset active rheumatoid arthritis: data from the GUEPARD trial and ESPOIR cohort. *Ann Rheum Dis*. 2011;70:611–5.
11. Stoffer M., Schoels M, Smolen JS, Aletaha D. Evidence for treating rheumatoid arthritis to target: results of a systematic literature search update. *Ann Rheum Dis*. 2016;75:16–22.
12. Coates LC, Moverley AR, Mcparland L, Brown S, Navarro-Coy N, O'dwyer JL, et al. Effect of tight control of inflammation in early psoriatic arthritis (TICOPA): a UK multicentre, open-label, randomised controlled trial. *Lancet*. 2015;386:2489–98.
13. Smolen JS, Braun J, Dougados M, Emery P, Fitzgerald O, Helliwell P, et al. Treating spondyloarthritis, including ankylosing spondylitis and psoriatic arthritis, to target: recommendations of an international task force. *Ann Rheum Dis*. 2014;73:6–16.

14. Schoels MM, Braun J, Dougados M, Emery P, Fitzgerald O, Kavanaugh A, et al. Treating axial and peripheral spondyloarthritis, including psoriatic arthritis, to target: results of a systematic literature search to support an international treat-to-target recommendation in spondyloarthritis. *Ann Rheum Dis*. 2014;73:238–42.
15. D. W. Treating to target in axial spondyloarthritis: Defining the target and the arrow. *Expert Rev Clin Immunol*. 2015;11:691–3.
16. Akkoc N, Can G, D'Angelo S, Padula A, Olivieri I. Therapies of Early, Advanced, and Late Onset Forms of Axial Spondyloarthritis, and the Need for Treat to Target Strategies. *Curr Rheumatol Rep. Current Rheumatology Reports*; 2017;19:1–11.
17. Wiens A, Correr CJ, Venson R, Grochocki MC, Otuki MF, Pontarolo R. A meta-analysis of the efficacy and safety of using infliximab for the treatment of rheumatoid arthritis. *Clin Rheumatol*. 2009;28:1365–73.
18. Blumenauer B, Cranney A, Burls A, Coyle D, Hochberg M, Tugwell P, et al. Etanercept for the treatment of rheumatoid arthritis (Review). *Cochrane Collab*. 2003;(3):1–78.
19. Navarro-sarabia F, Ariza-ariza R, Hernandez-cruz B, Villanueva I. Adalimumab for treating rheumatoid arthritis ( Review ). *Cochrane Database of Systematic Reviews*. 2005. p. 1–86.
20. Singh JA, Beg S, Lopez-Olivo MA. Tocilizumab for rheumatoid arthritis (Review). *Cochrane database of systematic reviews*. 2010. p. 1–355.
21. Singh J, Noorbaloochi S, Singh G. Golimumab for rheumatoid arthritis (Review). *Cochrane Database of Systematic Reviews*. 2010. p. 1–135.
22. Maxwell L, Singh J a. Abatacept for rheumatoid arthritis (Review). *Cochrane Database of Systematic Reviews*. 2009.
23. Mease PJ. Certolizumab pegol in the treatment of rheumatoid arthritis: a comprehensive review of its clinical efficacy and safety. *Rheumatology*. 2011;50:261–70.
24. Mease PJ, Gladman DD, Ritchlin CT, Ruderman EM, Steinfeld SD, Choy EHS, et al. Adalimumab for the treatment of patients with moderately to severely active psoriatic arthritis: Results of a double-blind, randomized, placebo-controlled trial. *Arthritis Rheum*. 2005;52:3279–89.
25. Mease PJ, Fleischmann R, Deodhar AA, Wollenhaupt J, Khraishi M, Kielar D, et al. Effect of certolizumab pegol on signs and symptoms in patients with psoriatic arthritis: 24-week results of a Phase 3 double-blind randomised placebo-controlled study (RAPID-PsA). *Ann Rheum Dis*. 2014;73:48–55.
26. Mease PJ, Kivitz AJ, Burch FX, Siegel EL, Cohen SB, Ory P, et al. Etanercept treatment of psoriatic arthritis: Safety, efficacy, and effect on disease progression. *Arthritis Rheum*. 2004;50:2264–72.
27. Kavanaugh A, McInnes I, Mease P, Krueger GG, Gladman D, Gomez-Reino J, et al. Golimumab, a new human tumor necrosis factor alpha antibody, administered every four weeks as a subcutaneous injection in psoriatic arthritis: Twenty-four-week efficacy and safety Results of a randomized, placebo-controlled study. *Arthritis Rheum*. 2009;60:976–86.
28. Antoni C, Krueger GG, de Vlam K, Birbara C, Beutler A, Guzzo C, et al. Infliximab improves signs and symptoms of psoriatic arthritis: results of the IMPACT 2 trial. *Ann Rheum Dis*. 2005;64:1150–7.
29. Dougados M, Van Der Heijde D, Sieper J, Braun J, Maksymowych WP, Citera G, et al. Symptomatic efficacy of etanercept and its effects on objective signs of inflammation in early nonradiographic axial spondyloarthritis: A multicenter, randomized, double-blind, placebo-controlled trial. *Arthritis Rheumatol*. 2014;66:2091–102.
30. Landewé R, Braun J, Deodhar A, Dougados M, Maksymowych WP, Mease PJ, et al. Efficacy of certolizumab pegol on signs and symptoms of axial spondyloarthritis including

- ankylosing spondylitis: 24-week results of a double-blind randomised placebo-controlled Phase 3 study. *Ann Rheum Dis.* 2014;73:39–47.
31. Sieper J, Lenaerts J, Wollenhaupt J, Rudwaleit M, Mazurov VI, Myasoutova L, et al. Efficacy and safety of infliximab plus naproxen versus naproxen alone in patients with early, active axial spondyloarthritis: results from the double-blind, placebo-controlled INFAST study, Part 1. *Ann Rheum Dis.* 2014;73:101–7.
  32. Inman RD, Davis JC, Van Der Heijde D, Diekman L, Sieper J, Sung IK, et al. Efficacy and safety of golimumab in patients with ankylosing spondylitis: Results of a randomized, double-blind, placebo-controlled, phase III trial. *Arthritis Rheum.* 2008;58:3402–12.
  33. Van Der Heijde D, Kivitz A, Schiff MH, Sieper J, Dijkmans BAC, Braun J, et al. Efficacy and safety of adalimumab in patients with ankylosing spondylitis: Results of a multicenter, randomized, double-blind, placebo-controlled trial. *Arthritis Rheum.* 2006;54:2136–46.
  34. Lund H, Brunnhuber K, Juhl C, Robinson K, Leenaars M, Dorch BF, et al. Towards evidence based research. *Bmj.* 2016;355:i5440.
  35. Smolen JS, Nash P, Durez P, Hall S, Ilivanova E, Irazoque-Palazuelos F, et al. Maintenance, reduction, or withdrawal of etanercept after treatment with etanercept and methotrexate in patients with moderate rheumatoid arthritis (PRESERVE): A randomised controlled trial. *Lancet.* Elsevier Ltd; 2013;381:918–29.
  36. Smolen JS, Emery P, Fleischmann R, Van Vollenhoven RF, Pavelka K, Durez P, et al. Adjustment of therapy in rheumatoid arthritis on the basis of achievement of stable low disease activity with adalimumab plus methotrexate or methotrexate alone: The randomised controlled OPTIMA trial. *Lancet.* 2014;383:321–32.
  37. van Vollenhoven RF, Østergaard M, Leirisalo-Repo M, Uhlig T, Jansson M, Larsson E, et al. Full dose, reduced dose or discontinuation of etanercept in rheumatoid arthritis. *Ann Rheum Dis.* 2016;75:52–8.
  38. van der Maas A, Kievit W, van den Bemt BJF, van den Hoogen FHJ, van Riel PL, den Broeder A a. Down-titration and discontinuation of infliximab in rheumatoid arthritis patients with stable low disease activity and stable treatment: an observational cohort study. *Ann Rheum Dis.* 2012;71:1849–54.
  39. van Herwaarden N, van der Maas A, Minten MJM, van den Hoogen FHJ, Kievit W, van Vollenhoven RF, et al. Disease activity guided dose reduction and withdrawal of adalimumab or etanercept compared with usual care in rheumatoid arthritis: open label, randomised controlled, non-inferiority trial. *Bmj.* 2015;350:h1389.
  40. Emery P, Hammoudeh M, FitzGerald O, Combe B, Martin-Mola E, Buch MH, et al. Sustained Remission with Etanercept Tapering in Early Rheumatoid Arthritis. *N Engl J Med.* 2014;371:1781–92.
  41. Raffeiner B, Botsios C, Ometto F, Bernardi L, Punzi L. Effects of half dose etanercept (25 mg once a week) on clinical remission and radiographic progression in patients with rheumatoid arthritis in clinical remission achieved with standard dose. *Clin Exp Rheumatol.* 2015;33:63–8.
  42. Cantini F, Niccoli L, Cassarà E, Kaloudi O, Nannini C. Sustained maintenance of clinical remission after adalimumab dose reduction in patients with early psoriatic arthritis: a long-term follow-up study. *Biol Targets Ther.* 2012;6:201–6.
  43. Janta I, Martínez-Estupiñán L, Valor L, Montoro M, Baniandres Rodriguez O, Hernández Aragüés I, et al. Comparison between full and tapered dosages of biologic therapies in psoriatic arthritis patients: clinical and ultrasound assessment. *Clin Rheumatol.* 2015;34:935–42.
  44. Fong W, Holroyd C, Davidson B, Armstrong R, Harvey N. The effectiveness of a real life

- dose reduction strategy for tumor necrosis factor inhibitor in ankylosing spondylitis and psoriatic arthritis. *Rheumatology*. 2016;55:1837–42.
45. Yates M, Hamilton LE, Elender F, Dean L, Doll H, MacGregor AJ, et al. Is etanercept 25 mg once weekly as effective as 50 mg at maintaining response in patients with ankylosing spondylitis? a randomized control trial. *J Rheumatol*. 2015;42:1177–85.
  46. Cantini F, Niccoli L, Cassarà E, Kaloudi O, Nannini C. Duration of remission after halving of the etanercept dose in patients with ankylosing spondylitis : a randomized, prospective, long-term, follow-up study. *Biol Targets Ther*. 2013;7:1–6.
  47. Almirall M, Salman-Monte TC, Lisbona MP, Maymó J. Dose reduction of biological treatment in patients with axial spondyloarthritis in clinical remission: Are there any differences between patients who relapsed and to those who remained in low disease activity? *Rheumatol Int*. Springer Berlin Heidelberg; 2015;35:1565–8.
  48. Arends S, van der Veer E, Kamps FB., Houtman PM, Bos R. Patient-tailored dose reduction of TNF- $\alpha$  blocking agents in ankylosing spondylitis patients with stable low disease activity in daily clinical practice. *Clin Exp Rheumatol*. 2015;33:174–80.
  49. van den Broek M, Klarenbeek NB, Dirven L, van Schaardenburg D, Hulsmans HM, Kerstens PJ, et al. Discontinuation of infliximab and potential predictors of persistent low disease activity in patients with early rheumatoid arthritis and disease activity score-steered therapy: subanalysis of the BeSt study. *Ann Rheum Dis*. 2011;70:1389–94.
  50. Westhovens R, Robles M, Ximenes AC, Wollenhaupt J, Durez P, Gomez-Reino J, et al. Maintenance of remission following 2 years of standard treatment then dose reduction with abatacept in patients with early rheumatoid arthritis and poor prognosis. *Ann Rheum Dis*. 2015;74:564–8.
  51. Moghadam MG, Vonkeman HE, Ten Klooster PM, Tekstra J, van Schaardenburg D, Starman-Kool M, et al. Stopping Tumor Necrosis Factor inhibitor Treatment in Patients with Established Rheumatoid Arthritis in Remission or with Stable Low Disease Activity: A Pragmatic Randomized Multicenter Open-Label Controlled Trial. *Arthritis Rheumatol*. 2016;68:1810–7.
  52. Kavanaugh A, Lee SJ, Curtis JR, Greenberg JD, Kremer JM, Soto L, et al. Discontinuation of tumour necrosis factor inhibitors in patients with rheumatoid arthritis in low-disease activity: persistent benefits. Data from the Corrona registry. *Ann Rheum Dis*. 2015;74:1150–5.
  53. Brocq O, Millasseau E, Albert C, Grisot C, Flory P, Roux CH, et al. Effect of discontinuing TNF $\alpha$  antagonist therapy in patients with remission of rheumatoid arthritis. *Jt Bone Spine*. Elsevier Masson SAS; 2009;76:350–5.
  54. Tanaka Y, Hirata S, Kubo S, Fukuyo S, Hanami K, Sawamukai N, et al. Discontinuation of adalimumab after achieving remission in patients with established rheumatoid arthritis: 1-year outcome of the HONOR study. *Ann Rheum Dis*. 2015;74:389–95.
  55. Yoshida K, Kishimoto M, Radner H, Matsui K, Okada M, Saeki Y, et al. Low rates of biologic-free clinical disease activity index remission maintenance after biologic disease-modifying anti-rheumatic drug discontinuation while in remission in a Japanese multicentre rheumatoid arthritis registry. *Rheumatology*. 2016;55:286–90.
  56. Brocq O, Millasseau E, Albert C, Roux CH, Euller-Ziegler L. Effect of discontinuing TNF $\alpha$  antagonist therapy in patients with remission of rheumatoid arthritis. *Jt Bone Spine*. 2009;76:350–5.
  57. Baraliakos X, Listing J, Rudwaleit M, Brandt J, Alten R, Burmester G, et al. Safety and efficacy of readministration of infliximab after longterm continuous therapy and withdrawal in patients with ankylosing spondylitis. *J Rheumatol*. 2007;34:510–5.

58. Haibel H, Heldmann F, Braun J, Listing J, Kupper H, Sieper J. Long-term efficacy of adalimumab after drug withdrawal and retreatment in patients with active non-radiographically evident axial spondyloarthritis who experience a flare. *Arthritis Rheum.* 2013;65:2211–3.
59. Song I-H, Althoff CE, Haibel H, Hermann K-GA, Poddubnyy D, Listing J, et al. Frequency and duration of drug-free remission after 1 year of treatment with etanercept versus sulfasalazine in early axial spondyloarthritis: 2 year data of the ESTHER trial. *Ann Rheum Dis.* 2012;71:1212–5.
60. Covelli M, Scioscia C, Iannone F, Lapadula G. Repeated infusions of low-dose infliximab plus methotrexate in psoriatic arthritis: immediate benefits are not maintained after discontinuation of infliximab. *Clin Exp Rheumatol.* 2005;23:145–51.
61. DRS. National behandlingsvejledning ( NBV ): Aksial spondylarthritis herunder ankyloserende spondylitis. Dansk Reumatologisk Selskab. 2017. p. 1–23.
62. Gossec L, Smolen JS, Ramiro S, de Wit M, Cutolo M, Dougados M, et al. European League Against Rheumatism (EULAR) recommendations for the management of psoriatic arthritis with pharmacological therapies: 2015 update. *Ann Rheum Dis.* 2016;75:499–510.
63. Coates LC, Kavanaugh A, Mease PJ, Soriano ER, Laura Acosta-Felquer M, Armstrong AW, et al. Group for Research and Assessment of Psoriasis and Psoriatic Arthritis 2015 Treatment Recommendations for Psoriatic Arthritis. *Arthritis Rheumatol.* 2016;68:1060–71.
64. Rådet for Anvendelse af Dyr Sygehusmedicin (RADS). Behandlingsvejledning for biologiske og syntetiske targeterede lægemidler til behandling af Rheumatoid Arthritis (RA) [Internet]. 2017 [cited 2017 Mar 7]. Available from: <http://www.rads.dk/media/4358/psa-beh-31-267934.pdf>
65. Rådet for Anvendelse af Dyr Sygehusmedicin (RADS). Behandlingsvejledning for biologiske og syntetiske targeterede lægemidler til behandling af aksiale spondylartropatier(aSPA) [Internet]. 2017 [cited 2017 Feb 18]. Available from: <http://www.rads.dk/media/4358/psa-beh-31-267934.pdf>
66. Rådet for Anvendelse af Dyr Sygehusmedicin (RADS). Behandlingsvejledning for biologiske og syntetiske targeterede lægemidler til behandling af psoriasis arthritis (PsA) [Internet]. 2017 [cited 2017 Feb 18]. Available from: <http://www.rads.dk/media/4358/psa-beh-31-267934.pdf>
67. Smolen JS, Landewé R, Bijlsma JWW, Burmester G, Breedveld FC, Dougados M, et al. EULAR recommendations for the management of rheumatoid arthritis with synthetic and biological disease-modifying antirheumatic drugs: 2016 update. *Ann Rheum Dis.* 2017;76:960–77.
68. Singh JA, Saag KG, Bridges SL, Akl EA, Bannuru RR, Sullivan MC, et al. 2015 American College of Rheumatology Guideline for the Treatment of Rheumatoid Arthritis. *Arthritis Rheumatol.* 2016;68:1–26.
69. Van Der Heijde D, Ramiro S, Landewé R, Baraliakos X, Van Den Bosch F, Sepriano A, et al. 2016 update of the ASAS-EULAR management recommendations for axial spondyloarthritis. *Ann Rheum Dis.* 2017;0:1–14.
70. Ward MM, Deodhar A, Akl EA, Lui A, Ermann J, Gensler LS, et al. American College of Rheumatology/Spondylitis Association of America/Spondyloarthritis Research and Treatment Network 2015 Recommendations for the Treatment of Ankylosing Spondylitis and Nonradiographic Axial Spondyloarthritis. *Arthritis Rheumatol.* 2016;68:151–66.
71. Staniszewska S, Brett J, Simera I, Seers K, Mockford C, Goodlad S, et al. GRIPP2 reporting checklists: tools to improve reporting of patient and public involvement in research. *Bmj.* 2017;358:j3453.

72. Hemingway H, Croft P, Perel P, Hayden J a, Abrams K, Timmis A, et al. Prognosis research strategy (PROGRESS) 1: A framework for researching clinical outcomes. *BMJ*. 2013;346:e5595.
73. Riley R., Hayden JA, Steyerberg EW, Moons KGM, Altman DG, Hemingway H. Prognosis Research Strategy (PROGRESS) 2: Prognostic Factor Research. *PLoS Med*. 2013;10:e1001380.
74. Steyerberg E, Moons KGM, van der Windt D, Hayden J, Perel P, Schroter S, et al. Prognosis research strategy (PROGRESS) 3: prognostic model research. *PLoS Med*. 2013;10:e1001381.
75. Hingorani ADA, van der Windt DA, Riley RD, Abrams K, Moons KGM, Steyerberg EW, et al. Prognosis research strategy (PROGRESS) 4: Stratified medicine research. *Bmj*. 2013;346:e5793.
76. Rådet for Anvendelse af Dyr Sygehusmedicin (RADS). Behandlingsvejledning for biologiske og syntetiske targeterede lægemidler til behandling af Reumatoid Arthritis (RA) [Internet]. 2017 [cited 2017 Oct 29]. p. 1–28. Available from: <http://rads.dk/media/4360/bgn-ra-31-237689.pdf>
77. Rådet for Anvendelse af Dyr Sygehusmedicin (RADS). Baggrundsnotat for biologiske og syntetiske targeterede lægemidler til behandling af Psoriasis Arthritis (PsA) [Internet]. 2017 [cited 2017 Oct 29]. p. 1–32. Available from: <http://rads.dk/media/4359/bgn-psa-31-237697.pdf>
78. Rådet for Anvendelse af Dyr Sygehusmedicin (RADS). Baggrundsnotat for biologiske og syntetiske targeterede lægemidler til behandlinger af aksiale spondylartropatier (aSPA) [Internet]. 2017 [cited 2017 Oct 29]. p. 1–26. Available from: <http://rads.dk/media/4362/bgn-aspa-31-237690.pdf>
79. van der Maas A, Lie E, Christensen R, Choy E, de Man Y a, van Riel P, et al. Construct and criterion validity of several proposed DAS28-based rheumatoid arthritis flare criteria: an OMERACT cohort validation study. *Ann Rheum Dis*. 2013;72:1800–5.
80. Moltó A, Gossec L, Landewé R, van der Heijde D, Dougados M. DEFINING CLINICALLY IMPORTANT WORSENING BASED ON ASDAS-CRP FOR AXIAL SPONDYLOARTHRITIS: A DATA-BASED CONSENSUS BY THE ASSESSMENT IN SPONDYLOARTHRITIS INTERNATIONAL SOCIETY (ASAS).
81. Vincent FB, Morand EF, Murphy K, Mackay F, Mariette X, Marcelli C. Antidrug antibodies (ADAb) to tumour necrosis factor (TNF)-specific neutralising agents in chronic inflammatory diseases: a real issue, a clinical perspective. *Ann Rheum Dis*. 2013;72:165–78.
82. Benucci M, Meacci F, Grossi V, Infantino M, Manfredi M, Bellio E, et al. Correlations between immunogenicity, drug levels, and disease activity in an Italian cohort of rheumatoid arthritis patients treated with tocilizumab. *Biol Targets Ther*. 2016;10:53–8.
83. Kneepkens EL, van den Oever I, Plasencia CH, Pascual-Salcedo D, de Vries A, Hart M, et al. Serum tocilizumab trough concentration can be used to monitor systemic IL-6 receptor blockade in patients with rheumatoid arthritis: a prospective observational cohort study. *Scand J Rheumatol*. Taylor & Francis; 2017;46:87–94.
84. Iwahashi M, Inoue H, Matsubara T, Tanaka T, Amano K, Kanamono T, et al. Efficacy, safety, pharmacokinetics and immunogenicity of abatacept administered subcutaneously or intravenously in Japanese patients with rheumatoid arthritis and inadequate response to methotrexate: a Phase II/III, randomized study. *Mod Rheumatol*. 2014;24:885–91.
85. Maneiro JR, Salgado E, Gomez-Reino JJ. Immunogenicity of monoclonal antibodies against tumor necrosis factor used in chronic immune-mediated Inflammatory conditions: systematic review and meta-analysis. *JAMA Intern Med*. 2013;173:1416–28.

86. Bouman C, van Herwaarden N, van den Hoogen F, van der Maas A, van den Bemt B, den Broeder AA. Prediction of successful dose reduction or discontinuation of adalimumab, etanercept, or infliximab in rheumatoid arthritis patients using serum drug levels and antidrug antibody measurement. *Expert Opin Drug Metab Toxicol*. Taylor & Francis; 2017;13:597–603.
87. de Wit MPT, Berlo SE, Aanerud GJ, Aletaha D, Bijlsma JW, Croucher L, et al. European League Against Rheumatism recommendations for the inclusion of patient representatives in scientific projects. *Ann Rheum Dis*. 2011;70:722–6.
88. Højgaard P, Christensen R, Dreyer L, Mease P, de Wit M, Skov L, et al. Pain mechanisms and ultrasonic inflammatory activity as prognostic factors in patients with psoriatic arthritis: protocol for a prospective, exploratory cohort study. *BMJ Open*. 2016;6:e010650.
89. Christensen R, Bliddal H, Henriksen M. Enhancing the reporting and transparency of rheumatology research: a guide to reporting guidelines. *Arthritis Res Ther*. 2013;15:109.
90. Moher D, Hopewell S, Schulz KF, Montori V, Gøtzsche PC, Devereaux PJ, et al. CONSORT 2010 explanation and elaboration: Updated guidelines for reporting parallel group randomised trials. *BMJ*. 2010;340:c869.
91. Piaggio G, Elbourne DR, Altman DG, Pocock SJ, Evans SJW. Reporting of noninferiority and equivalence randomized trials: an extension of the CONSORT statement. *JAMA*. 2012;308:2594–604.
92. Maneiro JR, Perez-Pampin E, Salgado E, Carmona L, Gomez-Reino JJ. Observational study of optimization of biologic therapies in rheumatoid arthritis: A single-centre experience. *Rheumatol Int*. 2014;34:1059–63.
93. Rodriguez-Rodriguez L, Leon L, Lamas JR, Gomez A, Abasolo L. Dose down-titration of biological DMARDs in patients with rheumatoid arthritis over time and in daily clinical practice. *Clin Exp Rheumatol*. 2016;34:872–9.
94. Fong W, Holroyd C, Davidson B, Armstrong R, Cooper C, Edwards C. The effectiveness of a real life dose reduction strategy for tumour necrosis factor inhibitors in ankylosing spondylitis and psoriatic arthritis. *Rheumatology*. 2016;55:2837–42.
95. Aletaha D, Neogi T, Silman AJ, Funovits J, Felson DT, Wolfe F, et al. 2010 Rheumatoid arthritis classification criteria: an American College of Rheumatology/European League Against Rheumatism collaborative initiative. *Ann Rheum Dis*. 2010;69:1580–8.
96. Arnett FC, Edworthy, Steven M, Bloch DA, McShane DJ, Fries JF, Cooper NS, et al. The American Rheumatism Association 1987 revised criteria for the classification of rheumatoid arthritis. *Arthritis Rheum*. 1988;31:315–24.
97. Linden S Van Der, Valkenburg HA, Cats A. Evaluation of Diagnostic Criteria for Ankylosing Spondylitis. *Arthritis Rheum*. 1984;27(4):361–8.
98. Rudwaleit M, van der Heijde D, Landewe R, Listing J, Akkoc N, Brandt J, et al. The development of Assessment of SpondyloArthritis international Society classification criteria for axial spondyloarthritis (part II): validation and final selection. *Ann Rheum Dis*. 2009;68:777–83.
99. Taylor W, Gladman D, Helliwell P, Marchesoni A, Mease P, Mielants H. Classification criteria for psoriatic arthritis: Development of new criteria from a large international study. *Arthritis Rheum*. 2006;54(8):2665–73.
100. Helliwell PS, Taylor WJ. Classification and diagnostic criteria for psoriatic arthritis. *Ann Rheum Dis*. 2005;64:ii3–ii8.
101. Cassell SE, Bieber JD, Rich P, Tutuncu ZN, Lee SJ, Kalunian C, et al. The Modified Nail Psoriasis Severity Index : Validation of an Instrument to Assess Psoriatic Nail Involvement in Patients with Psoriatic Arthritis. *J Rheumatol*. 2007;34:123–9.

102. Mease PJ. Measures of psoriatic arthritis. *Arthritis Care Res.* 2011;63:64–85.



## **25. List of appendix'**

**Appendix 1:** DAS28crp

**Appendix 2:** ASDAS

**Appendix 3:** DAPSA

**Appendix 4:** Patient Visual Analogue Scales (VAS)

**Appendix 5:** Health Assessment Questionnaire Disability Index (HAQ-DI)

**Appendix 6:** BASDAI

**Appendix 7:** BASFI

**Appendix 8:** 2010 ACR/EULAR Classification Criteria for RA (95)

**Appendix 9:** 1987 ACR RA Criteria: (96)

**Appendix 10:** 1984 modified New York Criteria for ankylosing spondylitis (AS): (97)

**Appendix 11:** 2009 ASAS Classification of SpA: (98)

**Appendix 12:** CASPAR Criteria: (99)

**Appendix 13:** Moll & Wright Criteria: (100)

**Appendix 14:** Enthesitis score by SPARCC in DANBIO

**Appendix 15:** BASMI

**Appendix 16:** 46 joint count for swollen and tender joints in DANBIO

**Appendix 17:** 66/68 joint count for swollen and tender joints in DANBIO

**Appendix 18:** Labels for the study drugs

**Appendix 19:** Patient diary of all changes in medication outside of the trial visits

**Appendix 20:** Written instruction for dose reduction of the biological therapy

**Appendix 21:** PASI score

**Appendix 22:** mNAPSI (101,102)

**Appendix 23:** Short Form Health Survey 36 (SF-36)

**Appendix 24:** Physician's global assessment of disease activity

**Appendix 25:** SAE form

## Statistical Analysis Plan for the Randomised Controlled Trial:

### **Dose reduction and discontinuation of biological therapy in patients with inflammatory arthritis: *Primary results from the 18 months randomised, open label, parallel-group, multi-centre trial***

Line Uhrenholt<sup>1,2,3</sup>, Robin Christensen<sup>3,4</sup>, Annette Schlemmer<sup>1,5</sup>, Ellen-Margrethe Hauge<sup>6,7</sup>, Lene Dreyer<sup>1,2</sup>, Anne Gitte Loft<sup>6,7</sup>, Mads Nyhuus Bendix Rasch<sup>6</sup>, Hans-Christian Horn<sup>8</sup>, Katrine Hindborg Gade<sup>1,8</sup>, Else Sloth Rousing<sup>6</sup>, Lone Thomasen<sup>6</sup>, Peter C. Taylor<sup>9</sup>, Salome Kristensen<sup>1,2</sup>

#### **AFFILIATIONS**

<sup>1</sup>: Department of Rheumatology, Aalborg University Hospital, Aalborg, Denmark

<sup>2</sup>: Department of Clinical Medicine Aalborg University, Aalborg, Denmark

<sup>3</sup>: Section for Biostatistics and Evidence-Based Research, the Parker Institute, Bispebjerg and Frederiksberg Hospital, Copenhagen, Denmark

<sup>4</sup>: Research Unit of Rheumatology, Department of Clinical Research, University of Southern Denmark, Odense University Hospital, Odense, Denmark.

<sup>5</sup>: Department of Rheumatology, Randers Regional Hospital, Randers, Denmark

<sup>6</sup>: Department of Rheumatology, Aarhus University Hospital, Aarhus, Denmark

<sup>7</sup>: Department of Clinical Medicine, Aarhus University, Aarhus, Denmark

<sup>8</sup>: Department of Rheumatology, Odense University Hospital, Odense, Denmark

<sup>9</sup>: Nuffield Department of Orthopaedics, Rheumatology and Musculoskeletal Sciences, University of Oxford, Oxford, UK

## ***Section 1: Administrative Information***

### **Title and trial registration**

Statistical analysis plan (SAP) for the randomised controlled trial entitled “*Dose reduction and discontinuation of biological therapy in patients with rheumatoid arthritis, psoriatic arthritis and axial spondyloarthritis: An 18 months randomised, open label, parallel-group, multi-centre trial*”.

Trial registration: EudraCT number: 2017-001970-41.

### **SAP version**

Version 1.0

September 14<sup>th</sup>, 2021

### **Protocol version**

This document has been written based on information contained in the study protocol version 10, dated September 5<sup>th</sup>, 2019.

### **SAP revisions**

None.

### **Roles and responsibility**

LU and RC designed and wrote this SAP in accordance to the SPIRIT/CONSORT and SAP statement for randomised trials (1–3). LU and RC are responsible for analysis of the trial results according to the SAP.

### **Signatures**

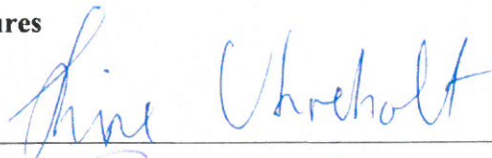  
MD, PhD Student, Coordinating investigator Line Uhrenholt

14/9-21

Date

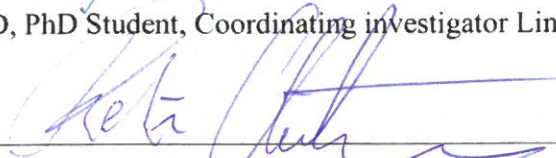  
Professor, MSc, PhD, Senior Biostatistician, Robin Christensen

SEPT. 14/2021

Date

## ***Section 2: Introduction***

### **Background and rationale**

BIODOPT was designed as a pragmatic, multicentre, randomised controlled, open-label, parallel-group trial, assessing the impact of tapering biological disease-modifying anti-rheumatic drugs (bDMARDs) in patients with inflammatory arthritis (i.e. rheumatoid arthritis [RA], psoriatic arthritis [PsA], and axial spondyloarthritis [axSpA]) in sustained remission or low disease activity (LDA). Traditionally, standard dose of bDMARDs are maintained lifelong after sustained remission/LDA are reached; however, recent studies indicate that a significant proportion successfully can taper bDMARDs while maintaining a stable low disease activity (4).

### **Aims**

The trial aims to assess whether a disease activity-guided tapering strategy for bDMARDs will enable a significant dose reduction while maintaining disease activity compared with usual care.

### **Objectives**

#### ***Primary outcome***

There are two co-primary efficacy endpoints:

- 1A Superiority: The proportion of patients who at 18 months are reduced to 50% or less of their baseline dose of bDMARD
- 1B Equivalence: Disease activity assessed 18 months from baseline.

The primary objective is met if a statistically significant reduction in dose of biologics is demonstrated compared to control (i.e. superior) while maintaining a comparable (i.e. equivalent) disease state.

#### ***Secondary outcomes***

Key secondary endpoints are:

- Proportion of patients in remission at 18 months
- Proportion of patients in LDA at 18 months

Additional supportive secondary endpoints are applicable to all patients: Changes from baseline to month 18 for the following:

- Pain Visual Analog Scale (VAS),
- Fatigue VAS,

- Patient global health VAS,
- Health Assessment Questionnaire Disability Index (HAQ-DI),
- Short Form Health Survey 36 (SF-36) physical component summary (PCS),
- Short Form Health Survey 36 (SF-36) mental component summary (MCS),
- Physician global health VAS,
- Joint count: swollen joints,
- Joint count: tender joints,
- C-reactive protein (CRP)

***Exploratory outcomes:***

All of the above, analysed according to their assessments at month 4, 8, and 12

RA patients (only):

- Disease Activity Score<sub>28crp</sub> (DAS<sub>28crp</sub>),
- Clinical Disease Activity Index (CDAI), and
- Simplified Disease Activity Index (SDAI)

PsA patients (only):

- DAS<sub>28crp</sub>,
- Disease Activity in Psoriatic Arthritis (DAPSA),
- Minimal disease activity criteria (MDA),
- Psoriasis Area Severity Index (PASI),
- Modified Nail Psoriasis Severity Index (mNAPSI),
- Enthesitis score by Spondyloarthritis Research Consortium Canada enthesitis score (SPARCC), and
- Dactylitis by number of affected fingers/toes

AxSpA patients (only):

- Ankylosing Spondylitis Disease Activity Score (ASDAS),
- Bath Ankylosing Spondylitis Disease Activity Index (BASDAI),
- Bath Ankylosing Spondylitis Functional Index (BASFI),
- Bath Ankylosing Spondylitis Metrology Index (BASMI),
- PASI,
- mNAPSI,

- SPARCC, and
- Dactylitis status.

### Protocol amendments

Protocol amendments with dates of report to the relevant authorities are summarised below.

| Amendment number | Amendment date                  | Description of amendment                                                                                                                                                                                                                      |
|------------------|---------------------------------|-----------------------------------------------------------------------------------------------------------------------------------------------------------------------------------------------------------------------------------------------|
| 1                | June 12 <sup>th</sup> 2018      | The Department of Rheumatology, South West Jutland, Esbjerg, was added as study site (but the site never included any patients)                                                                                                               |
| 2                | September 24 <sup>th</sup> 2018 | The biosimilar drugs Imraldi and Amgevita (adalimumab) was added as approved study drugs as all patients treated with adalimumab per national guideline had to switch to biosimilar adalimumab in the form of Imraldi or Amgevita.            |
| 3                | March 8 <sup>th</sup> 2019      | The biosimilar drug Zessly (infliximab) was added as approved study drug as all patients treated with infliximab per national guideline had to switch to biosimilar infliximab in the form of Zessly.                                         |
| 4                | September 5 <sup>th</sup> 2019  | The Department of Rheumatology, Silkeborg Regional Hospital, was added as study site                                                                                                                                                          |
| 5                | November 30 <sup>th</sup> 2020  | The biosimilar drugs Erelzi (etanercept) and Hyrimoz (adalimumab) was added as approved study drugs as all patients treated with etanercept or adalimumab per national guideline had to switch to biosimilar Erelzi or Hyrimoz, respectively. |
| 6                | March 20 <sup>th</sup> 2020     | Suspension of patient enrolment due to the national implication of the COVID-19 pandemic to the Danish health care system                                                                                                                     |
| 7                | April 2 <sup>nd</sup> 2020      | The inclusion period was closed 1 month before scheduled due to the continued national COVID-19 implication to the Danish health care system.                                                                                                 |

## ***Section 3: Study Methods***

### **Trial design**

BIODOPT was designed as a pragmatic, multicentre, randomised controlled, open-label, parallel-group trial of 18 months duration. Eligible patients were diagnosed with RA, PsA or axSpA treated with bDMARDs while maintaining remission/LDA during the past 12 months. Patients were randomised in a ratio of 2:1 to either disease activity-guided tapering of bDMARDs (experimental intervention group) or continuation of bDMARDs as usual care (comparator/control group).

### **Randomisation**

The randomisation sequence was computer-generated before start of the enrolment period by the senior biostatistician with no clinical involvement in the trial (RC). Patients were allocated in ratio 2:1 in permuted blocks of 3 to 6 stratified by trial site (Aalborg, Aarhus, Odense, or Silkeborg), diagnosis (RA, axSpA or PsA) and repeated biologics failure (currently on biological agent number 3 or higher). The randomisation sequences (24 mutually independent strata in total) were generated using SAS statistical software (version 9.4; SAS Proc Plan).

The allocation sequence was concealed in a password-protected computer file only accessible to RC and the independent data manager (JHW). JHW entered the randomisation sequence into the electronic case report form (e-CRF) in the Research Electronic Data Capture (REDCap) platform. REDCap provided consecutive screening numbers with concealed group allocation (depending on the specific combination of strata's).

### **Power and sample size considerations**

The sample size calculation was performed in accordance with the DELTA<sup>2</sup> guideline for reporting sample size calculations in randomised controlled trials (5).

Primary efficacy endpoint 1A: Based on data from the DRESS-RA trial (6), it was assumed that 30% in the experimental intervention group and 5% in the comparator control group would meet the primary endpoint 1A. Using Pearson's Chi-square statistic with a two-sided significance level of 0.05 and an allocation ratio of 2:1, a sample size of 180 patients (appr. 120 vs 60 in each group) yielded a very high statistical power of 0.992 (99%) if the proportion of patients reduced to 50% or less of their baseline dose of bDMARD were 30% and 5% as suggested above.

Primary efficacy endpoint 1B: Members of the BIODOPT trial group defined an equivalence margin of  $\pm 0.5$  DAS28crp points for patients with RA or PsA and  $\pm 0.5$  ASDAS points for



patients with axSpA. The margins were based on “less than half of the effect” that would be considered a clinically relevant reduction in disease activity i.e.  $\Delta\text{DAS28crp} > 1.2$  or  $\Delta\text{ASDAS} > 1.1$ . Two one-sided test analysis was applied for additive equivalence of two-sample normal means with bounds  $\pm 0.5$  for the mean difference, an allocation ratio of 2:1 and a significance level of 0.05 when assuming a mean difference of 0 and a common standard deviation of 1.0. Thus, a sample size of 180 patients (appr. 120 vs 60 in each group) was required to obtain a power of 0.868 (87%).

### **Framework**

The primary efficacy 1A will be tested in terms of the expected superiority, while endpoint 1B will be interpreted based on its comparability between groups (i.e. equivalence: sufficiently narrow confidence intervals).

### **Statistical interim analyses and stopping guidance**

No interim analyses are performed during this trial.

### **Timing of final analysis**

Final analysis will be performed collectively and published in one paper (expected submission date January 2022).

### **Timing of outcome assessments**

A detailed overview of all study procedures for each diagnosis (i.e. RA, PsA or axSpA) are presented in the trial protocol, Table 1A-1C on page 35-37.



## ***Section 4: Statistical Principles***

### **Confidence intervals and *P* values**

#### ***Level of statistical significance and use of confidence intervals***

All applicable statistical tests and 95% confidence intervals (95%CI) will be 2-sided and performed using a 5% significance level as indicative of a possible difference between groups.

For the primary efficacy endpoint 1A (i.e. reduction of bDMARD dose to 50% or less of baseline dose), a statistically, significant difference between the intervention groups is required to demonstrate superiority for tapering bDMARDs compared to continuous use. To confirm equivalence for primary efficacy endpoint 1B (i.e. comparable disease activity after 18 months), the 95%CI around the mean difference in disease activity must be within  $\pm 0.5$  DAS28crp/ASDAS points (i.e. the equivalence margins).

#### ***Rationale for any adjustment for multiplicity***

The primary objective in the BIODOPT trial is a composite primary endpoint requiring two co-primary efficacy endpoints to be met. Two steps will be applied for evaluation of the primary objective. In step 1, superiority of primary efficacy endpoint 1A will be evaluated i.e. significantly more patients (higher proportion) in the experimental intervention group reduce bDMARDs dose to 50% or less of their baseline dose compared to the control comparator group ( $P < 0.05$ ). If and only if, statistically significant superiority in primary efficacy endpoint 1A is indicated, then, equivalence in disease activity i.e. primary efficacy endpoint 1B will be evaluated in step 2. Equivalence for primary efficacy endpoint 1B will be judged as likely if the 95%CI for the between-group difference in disease activity (DAS28crp/ASDAS) lies within:  $\pm 0.5$  disease activity points.

Because of the multitude of secondary endpoints, multiplicity of efficacy evidence from these will be taken into consideration (7). Therefore, a hierarchical order will be applied in the evaluation of the key and supportive secondary outcomes to preserve the overall type-1 error rate at a two-sided alpha level of approximately 0.05(8).

### **Adherence and protocol deviations**

Acceptable adherence to the trial protocol is defined as participants who complete visit month 18. Possible withdrawal from assigned intervention or withdrawal from treatment including concomitant

csDMARD or NSAIDs will be tracked by research personnel in the e-CRF in REDCap and summarised by treatment arm. Furthermore, missing variables will be summarised by number per intervention group corresponding to the intention-to-treat population.

***Pre-defined major protocol violations that might occur are:***

- Enrolled patients not fulfilling study eligibility criteria
- Visit month 18 not performed due to e.g. withdrawal or loss to follow-up

A summary of major protocol deviations and violations by number and percentage in each intervention group will be provided together with details of the type of violation. The intention-to-treat (ITT) population data set will be used as the denominator to calculate the percentages. No formal statistical tests will be performed.

**Analysis populations**

The primary and secondary outcomes will be analysed according to the ITT population i.e. all randomised participants with available outcome data independent of protocol deviations (9). ITT analyses with single-step replacement of missing data as well as “*per protocol*” analyses will be performed for the purpose of sensitivity, in order to explore the robustness of the overall study findings.

## ***Section 5: Trial Population***

### **Screening data**

The screening period started on May 17<sup>th</sup>, 2018, and was suspended on March 13<sup>th</sup>, 2020, due to the implication of the COVID-19 pandemic on the Danish health care activities. On April 2<sup>nd</sup>, 2020, the screening period was closed as the national suspension had not yet been lifted; moreover, due to a lower enrolment rate than expected the screening period had already been prolonged one additional year and was therefore scheduled to end in May 2020.

The following screening data will be registered and presented:

- Length of the screening period
- Number of patients screened
- Number of patients enrolled and randomised
- Number of screened patients not enrolled
- Reason for non-enrolment

### **Eligibility**

Eligibility criteria are described in detail in the trial protocol. The number of ineligible patients randomised, if any, will be reported, with reasons for ineligibility. A CONSORT flow diagram (**Outline Figure 1**, presented below) will illustrate participant enrolment including reasons for non-enrolment.

### **Recruitment**

The use of a CONSORT flow diagram provides an overview of the number of patients screened, eligible, randomised, receiving the allocated intervention, withdrawing consent/discontinued/lost to follow-up and included in primary analysis. Any reason for exclusion with number of patients will be reported.

### **Withdrawal/follow-up**

Withdrawal will be classified as:

- Withdraw from the trial but allow use of data collected to date
- Withdraw from the trial and withdraw consent for use of data collected to date
- Lost to follow-up

Numbers and reasons for any withdrawals, exclusions or loss to follow-up will be summarised by intervention group and presented in the CONSORT flow diagram.

### **Baseline patient characteristics**

**Outline Table 1**, illustrated below, gives an overview of baseline characteristics of enrolled and randomised participants. Categorical data will be summarised by numbers and percentages and continuous data will be summarised by mean and SD if data are normally distributed and median and IQR if data are skewed; Also the range (minimum and maximum, respectively) will be summarised for continuous data. Formal tests for statistical significance will not be performed; however, apparent imbalances will be noted and, if necessary, will be evaluated based on standardised differences rather than *P*-values from erroneous null-hypotheses.

## ***Section 6: Analysis***

### **Outcome definitions**

#### ***Primary endpoint***

There are two co-primary efficacy endpoints:

- 1A Superiority: The proportion of patients who at 18 months are reduced to 50% or less of their inclusion dose of bDMARD (i.e. abatacept, adalimumab, certolizumab pegol, etanercept, golimumab, infliximab or tocilizumab).
- 1B Equivalence: Disease activity assessed with DAS28crp for patients with RA and PsA, and with ASDAScrp for patients with axSpA 18 months from baseline.

The primary outcome is only met if a statistically significant reduction in biologics is demonstrated (i.e. superiority) while maintaining a comparable (i.e. equivalent) disease state.

#### ***Secondary outcomes***

Key secondary endpoints are:

- Proportion of patients in remission (defined as DAS28crp < 2.6 or ASDAScrp < 1.3) in each intervention group at 18 months
- Proportion of patients in LDA (defined as DAS28crp < 3.2 or ASDAScrp < 2.1) in each intervention group at 18 months

Supportive secondary endpoints are:

- Changes from baseline to month 18 for the following:
  - Pain VAS
  - Fatigue VAS
  - Patient Global Health VAS
  - HAQ-DI
  - SF-36 PCS
  - SF-36 MCS
  - Physician Global Health VAS
  - Swollen joint count
  - Tender joint count
  - CRP

Other exploratory outcomes are (stratified by condition):

- All of the above, reported according to their assessments at month 4, 8, and 12
- RA: DAS28crp, CDAI, and SDAI
- PsA: DAS28crp, DAPSA, MDA, PASI, mNAPSI, enthesitis score by SPARCC, and dactylitis by number
- AxSpA: ASDAS, BASDAI, BASFI, BASMI, PASI, mNAPSI, SPARCC, dactylitis by number

### Analysis methods

All analyses will be performed in accordance with this pre-specified SAP (3,10) and reported in accordance with the recommendations of the EQUATOR network (11); i.e. the appropriate CONSORT statement (1,2).

All outcome measures will be analysed based on the ITT population (12), including all randomised participants with available data at baseline (i.e. modified ITT population) (13). Missing data for continuous outcome variables will be handled indirectly, statistically modelled using repeated-measures linear mixed-effects models (see below). These models will be valid if data are ‘*Missing at Random*’ (MAR) (14). Contrasts between groups will be estimated based on the least squares means and the corresponding standard errors derived from the full model with repeated-measures analysis (0, 4, 8, 12, and 18 months from baseline); with the important contrast between groups corresponding to 18 months from baseline. The model will include group (i.e. tapering vs continuation), diagnosis (RA, PsA, *or*, axSpA), bDMARD failure history (<3 previous bDMARDs, *or* ≥3 previous bDMARDs), centre status (Aalborg, Aarhus, Odense, *or* Silkeborg), and time point (0, 4, 8, 12, and 18 months from baseline) as class (fixed effect) factors, while the baseline value of the relevant variable will be included as a covariate to reduce the random variation. Categorical outcomes for dichotomous endpoints (including responder status and harms) will be analysed with logistic regression (excluding repeated measures) with the same fixed effect factors and covariates as for the continuous outcome measures. In the main analyses, missing data for the dichotomous outcomes will be analysed based on the conservative assumption that the trial was a failure (e.g. patients *were not able* to reduce their biologics to 50% or less of their baseline dose; *or did not* sustain low disease activity/remission).

To assess the adequacy of the linear models describing the observed data—and checking assumptions for the systematic and the random parts of the models—we will use the predicted

values and the residuals; i.e., the residuals have to be approximately normally distributed (around 0) and be independent of the predicted values.

The cumulative incidence of patients having flares will be visualized for the two trial arms in a Kaplan-Meier time-to-event (survival) curve presented with hazard ratio using Cox proportional-hazards model. All analyses will be performed using commercially available statistical software (SAS, version 9.4; SAS Institute Inc and/or STATA, version 16).

## Missing data

For the main analyses, simplistic imputation techniques will be used to handle missing data for dichotomous outcomes (assuming trial failure), while continuous outcomes will be handled indirectly via the mixed-effects model framework.

Regarding prevention and treatment of missing data in clinical trials, robustness is a relatively new concept (15); a concept that we will apply to assess the sensitivity of the overall conclusions to various limitations of the data, assumptions, and analytic approaches to data analysis. Robustness implies that the treatment effect and primary conclusion of the trial are not substantially affected when analyses are carried out based on alternative assumptions or analytic approaches (15). Since lost to follow-up and missing data for various reasons is difficult to avoid in randomised (pragmatic) trials like the BIODOPT trial, we will apply the following analysis framework suggested by White et al. (16).

Missing data related to the ITT approach depend on making plausible assumptions about the missingness of the data and including all participants in subsequent sensitivity analyses (steps: 1 to 4):

1. We will: Attempt to follow up all randomised participants, even if they withdraw from allocated treatment.
2. We will: Perform the primary analyses of all observed data that are valid under a plausible assumption about the missingness of the data (i.e., Model-based: using repeated-measures linear mixed-effects models, assuming that data are '*Missing at Random*' [MAR]).
3. Perform sensitivity analyses to explore the effect of departures from the assumption made in the primary (#2) analyses (i.e., a non-responder-imputation: using the value at baseline to replace missing data will correspond to a non-responder imputation; these models will potentially be informative even if data are '*Missing Not At Random*' [MNAR]).

4. Account for all randomised participants, at least in the sensitivity analyses (covered by #2 and supported by #3 above, plus the corresponding analyses based on the *per protocol* population).

The interpretation of the corresponding statistical measures of uncertainty of the treatment effect and treatment comparisons will involve consideration of the potential contribution of bias to the *P*-value, 95% CI, and of the inference in general.

### **Additional analyses**

Stratified (subgroup) analyses on the primary endpoint(s) will be performed to explore potentially relevant effect modifiers among the baseline measures (17):

- Site: Aalborg, Aarhus, Odense or Silkeborg
- Diagnosis: RA, PsA or axSpA
- Repeated biologics failure:  $<3$  or  $\geq 3$
- Sex: female or male
- Age:  $<$  median age or  $\geq$  median age
- bDMARD drug mode of action: TNFi, IL6-inhibitor or t-cell-co-stimulation blocker
- Remission status: remission or LDA

### **Harms and adverse events**

Number and percentage of adverse events (AE) including flare and infectious adverse events will be reported as well as serious adverse events (SAE) such as serious infections, cardiovascular events, malignancies, and deaths as illustrates in **Outline Table 3**. The type AE, severity and relationship to study drugs will be reported. Moreover, number and percentage of patients in each intervention group who prematurely discontinue their study drug due to any AE will also be reported.

Thus, safety and harm summaries will be reported by trial arm including an estimate of the between group difference which will be analysed using Chi-square test/Fisher's exact test (depending on large/small sample).



## References

1. Moher D, Hopewell S, Schulz KF et al. CONSORT 2010 explanation and elaboration: Updated guidelines for reporting parallel group randomised trials. *BMJ*. 2010;340:c869.
2. Piaggio G, Elbourne DR, Altman DG et al. Reporting of noninferiority and equivalence randomized trials: an extension of the CONSORT statement. *JAMA*. 2012;308:2594–604.
3. Gamble C, Krishan A, Stocken D, Lewis S, Juszczak E, Doré C, et al. Guidelines for the content of statistical analysis plans in clinical trials. *JAMA*. 2017;318:2337–43.
4. Uhrenholt L, Christensen R, Dinesen W, Liboriussen C, Andersen S, Dreyer L, et al. Risk of flare after tapering or withdrawal of biological and targeted synthetic disease-modifying antirheumatic drugs in patients with inflammatory arthritis: A systematic review and meta-analysis of randomised controlled trials. Submitted.
5. Cook JA, Julious SA, Sones W et al. DELTA2 guidance on choosing the target difference and undertaking and reporting the sample size calculation for a randomised controlled trial. *Bmj*. 2018;363:k3750.
6. van Herwaarden N, van der Maas A, Minten MJM et al. Disease activity guided dose reduction and withdrawal of adalimumab or etanercept compared with usual care in rheumatoid arthritis: open label, randomised controlled, non-inferiority trial. *Bmj*. 2015;350:h1389.
7. Dmitrienko A, D'Agostino RB. Multiplicity Considerations in Clinical Trials. *N Engl J Med*. 2018;378:2115–22.
8. Yadav K, Lewis RJ. Gatekeeping strategies for avoiding false-positive results in clinical trials with many comparisons. *JAMA*. 2017;318:1385–6.
9. Dossing A, Tarp S, Furst DE et al. Interpreting trial results following use of different intention-to-treat approaches for preventing attrition bias: A meta-epidemiological study protocol. *BMJ Open*. 2014;4:e005297.
10. Christensen R, Langberg H. Statistical principles for prospective study protocols: design, analysis, and reporting. *Int J Sport Phys Ther*. 2012;7:504–11.
11. Christensen R, Bliddal H, Henriksen M. Enhancing the reporting and transparency of rheumatology research: a guide to reporting guidelines. *Arthritis Res Ther*. 2013;15:109.
12. Detry MA, Lewis RJ. The intention-to-treat principle: How to assess the true effect of choosing a medical treatment. *JAMA*. 2014;312:85–6.
13. Dossing A, Tarp S, Furst DE, Glud C, Wells GA, Beyene J, et al. Modified intention-to-

treat analysis did not bias trial results. *J Clin Epidemiol* [Internet]. 2016;72:66–74. Available from: <http://dx.doi.org/10.1016/j.jclinepi.2015.11.003>

14. Detry MA, Ma Y. Analyzing repeated measurements using mixed models. *JAMA*. 2016;315:407–8.
15. Little R, D'Agostino R, Cohen M, Dickersin K, Emerson S, Farrar J, et al. The Prevention and Treatment of Missing Data in Clinical Trials. *N Engl J Med*. 2012;367:1355–60.
16. White I, Horton N, Carpenter J, Pocock S. Strategy for intention to treat analysis in randomised trials with missing outcome data. *BMJ*. 2011;342:d40.
17. Christensen R, Bours MJL, Nielsen SM. Effect Modifiers and Statistical Tests for Interaction in Randomized Trials. *J Clin Epidemiol* [Internet]. 2021;134:174–7. Available from: <https://doi.org/10.1016/j.jclinepi.2021.03.009>
18. Fautrel B, Pham T, Alfaiate T et al. Step-down strategy of spacing TNF-blocker injections for established rheumatoid arthritis in remission: results of the multicentre non-inferiority randomised open-label controlled trial. *Ann Rheum Dis*. 2016;75:59–67.

## ***Section 7: Manuscript outline***

The manuscript outline will include the following documents:

- Outline Figure 1: Flow diagram of participant recruitment and trial profile
- Outline Table 1: Baseline demographics and disease characteristics in the ITT population.
- Outline Figure 2: Mock-up (simulated data visualisation) of disease activity during the study period by diagnosis. Values will be Least Squares Means with Standard Errors.
- Outline Table 2: Comparison between groups at 18 months based on the ITT population using repeated-measures linear mixed-effects models
- Outline Figure 3: Mock-up (simulated data visualisation) of flares by trial arm visualised by a Kaplan Meier cumulative incidence curve.
- Outline Table 3: Safety and harm summary (data analysed “as observed” based on the original ITT population)
- Outline Appendix 1: The BIODOPT trial protocol, version 10, September 5<sup>th</sup> 2019
- Outline Appendix 2: The statistical analysis plan, version 1.0
- Outline Appendix Table 1: Baseline demographics and disease characteristics by diagnosis
- Outline Appendix Table 2: Comparison between groups at 18 months based on the ITT population using non-responder imputation (Baseline Observation Carried Forward)
- Outline Appendix Table 3: Comparison between groups at 18 months based on the *per protocol* population (i.e. no missing data)
- Outline Appendix Table 4: Descriptive results reported by diagnosis

**Outline Figure 1:** Flow diagram of patient recruitment

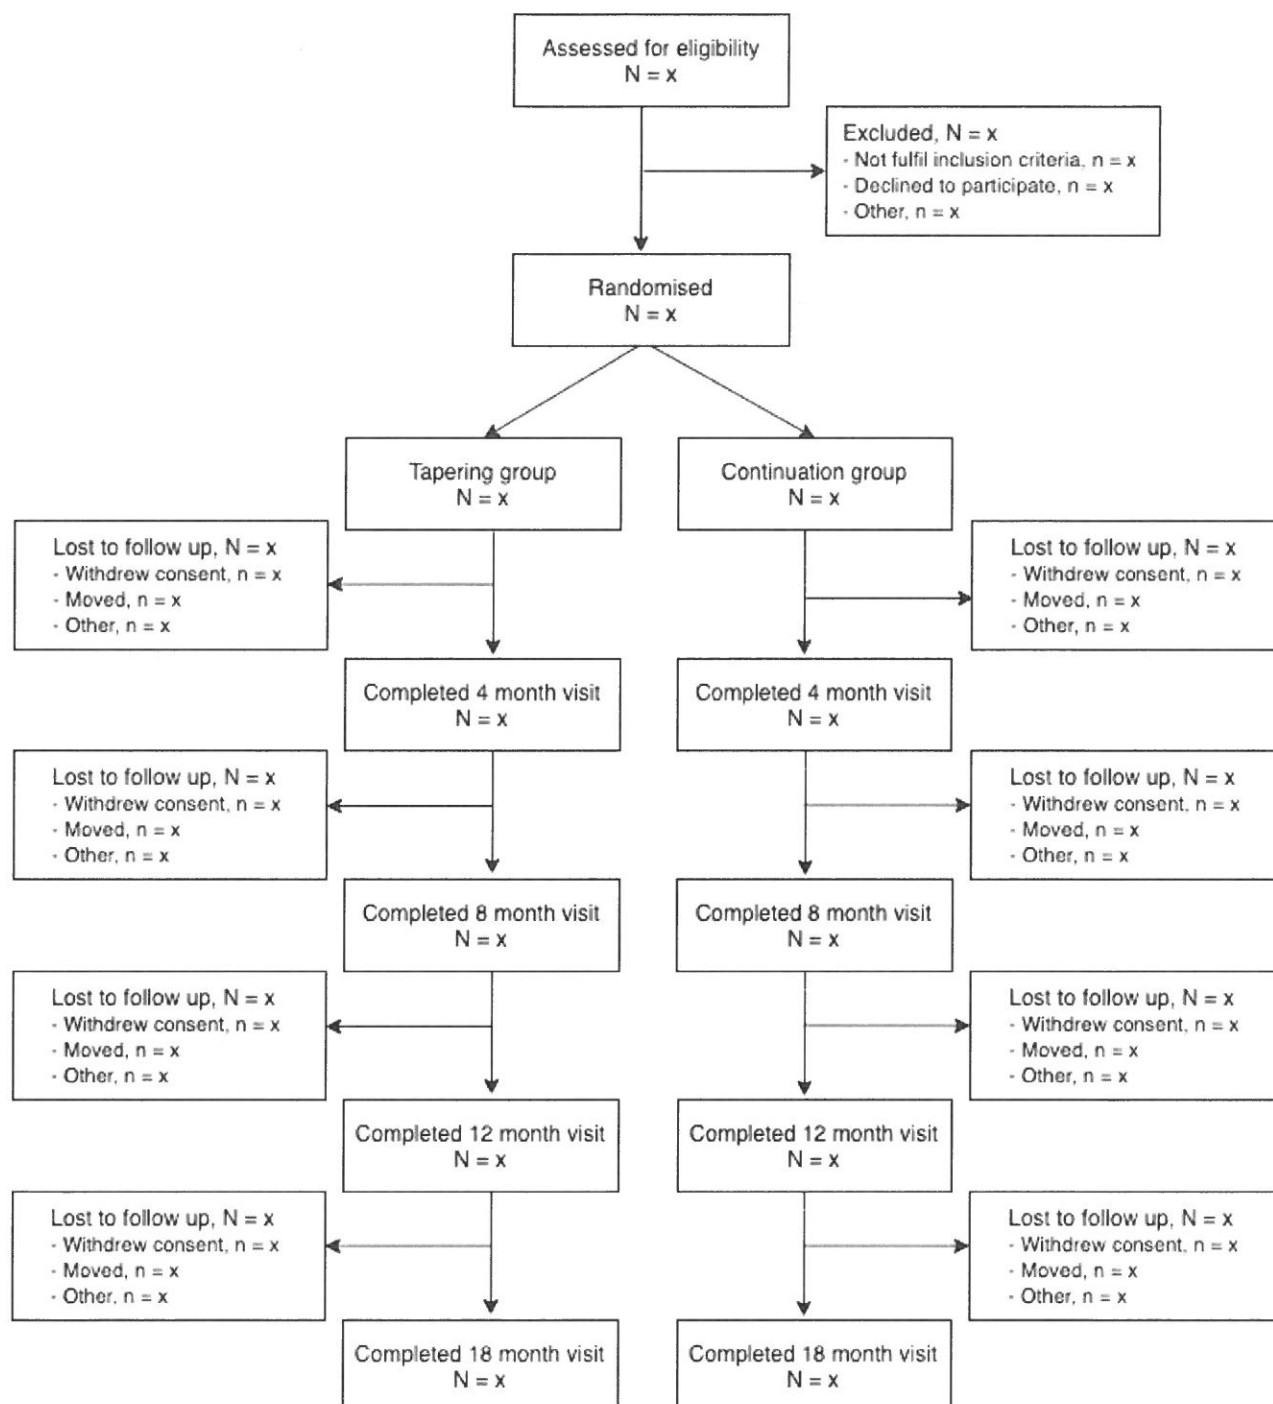

**Outline Table 1:** Baseline demographics and disease characteristics in the ITT population.

| Variable                                                   | Tapering group<br>(N=?) | Continuation group<br>(N=?) | All<br>(N = ?) |
|------------------------------------------------------------|-------------------------|-----------------------------|----------------|
| <b>General characteristics</b>                             |                         |                             |                |
| Female, n (%)                                              |                         |                             |                |
| Age (years)                                                |                         |                             |                |
| Smoking, n (%)                                             |                         |                             |                |
| Body Mass Index (kg/m <sup>2</sup> )                       |                         |                             |                |
| <b>Arthritis characteristics:</b>                          |                         |                             |                |
| Diagnosis:                                                 |                         |                             |                |
| - RA, n (%)                                                |                         |                             |                |
| - PsA, n (%)                                               |                         |                             |                |
| - axSpA, n (%)                                             |                         |                             |                |
| Disease duration from arthritis diagnosis                  |                         |                             |                |
| <b>Disease activity measures:</b>                          |                         |                             |                |
| HAQ-DI (score: 0-3)                                        |                         |                             |                |
| Pain VAS (score: 0-100 mm)                                 |                         |                             |                |
| Fatigue VAS (score: 0-100 mm)                              |                         |                             |                |
| Patient global health VAS (score: 0-100 mm)                |                         |                             |                |
| Short Form-36:                                             |                         |                             |                |
| Physical component summary (score 0-100)                   |                         |                             |                |
| Mental component summary (score: 0-100)                    |                         |                             |                |
| Physician global health VAS (score: 0-100 mm)              |                         |                             |                |
| Tender joint count (0-68)                                  |                         |                             |                |
| Swollen joint count (0-66)                                 |                         |                             |                |
| CRP (mg/L)                                                 |                         |                             |                |
| In remission <sup>1</sup> , n (%)                          |                         |                             |                |
| <b>Arthritis treatment characteristics</b>                 |                         |                             |                |
| csDMARDs, n (%)                                            |                         |                             |                |
| Combination csDMARDs, n (%)                                |                         |                             |                |
| MTX, n (%)                                                 |                         |                             |                |
| Duration of current bDMARDs (months)                       |                         |                             |                |
| Current bDMARD therapy:                                    |                         |                             |                |
| TNF- $\alpha$ inhibitor, n (%)                             |                         |                             |                |
| IL-6 inhibitor, n (%)                                      |                         |                             |                |
| T-cell co-stimulation blocker, n (%)                       |                         |                             |                |
| Repeated bDMARD failure history ( $\geq 3$ bDMARDs), n (%) |                         |                             |                |

Values are means and standard deviation (SD) unless otherwise stated.

n: number, kg: kilogram, m<sup>2</sup>: square metre, RA: rheumatoid arthritis, PsA: psoriatic arthritis, axSpA: axial spondyloarthritis, HAQ-DI: Health Assessment Questionnaire Disability Index, VAS: Visual Analog Scale, CRP: C-reactive protein, mg: milligram, L:litre, csDMARDs: Conventional synthetic disease-modifying antirheumatic drugs, MTX: methotrexate, bDMARD: biologic disease-modifying antirheumatic drug, TNF: Tumor necrosis factor, IL: Interleukin

<sup>1</sup>: Evaluated as Disease Activity Score (DAS)28crp < 2.6 for RA and PsA and Ankylosing Spondylitis Disease Activity Score (ASDAS)crp < 1.3 for axSpA.

**Outline Figure 2:** Mock-up (simulated data visualisation) of disease activity during the study period by diagnosis. Values are Least Squares Means with Standard Errors.

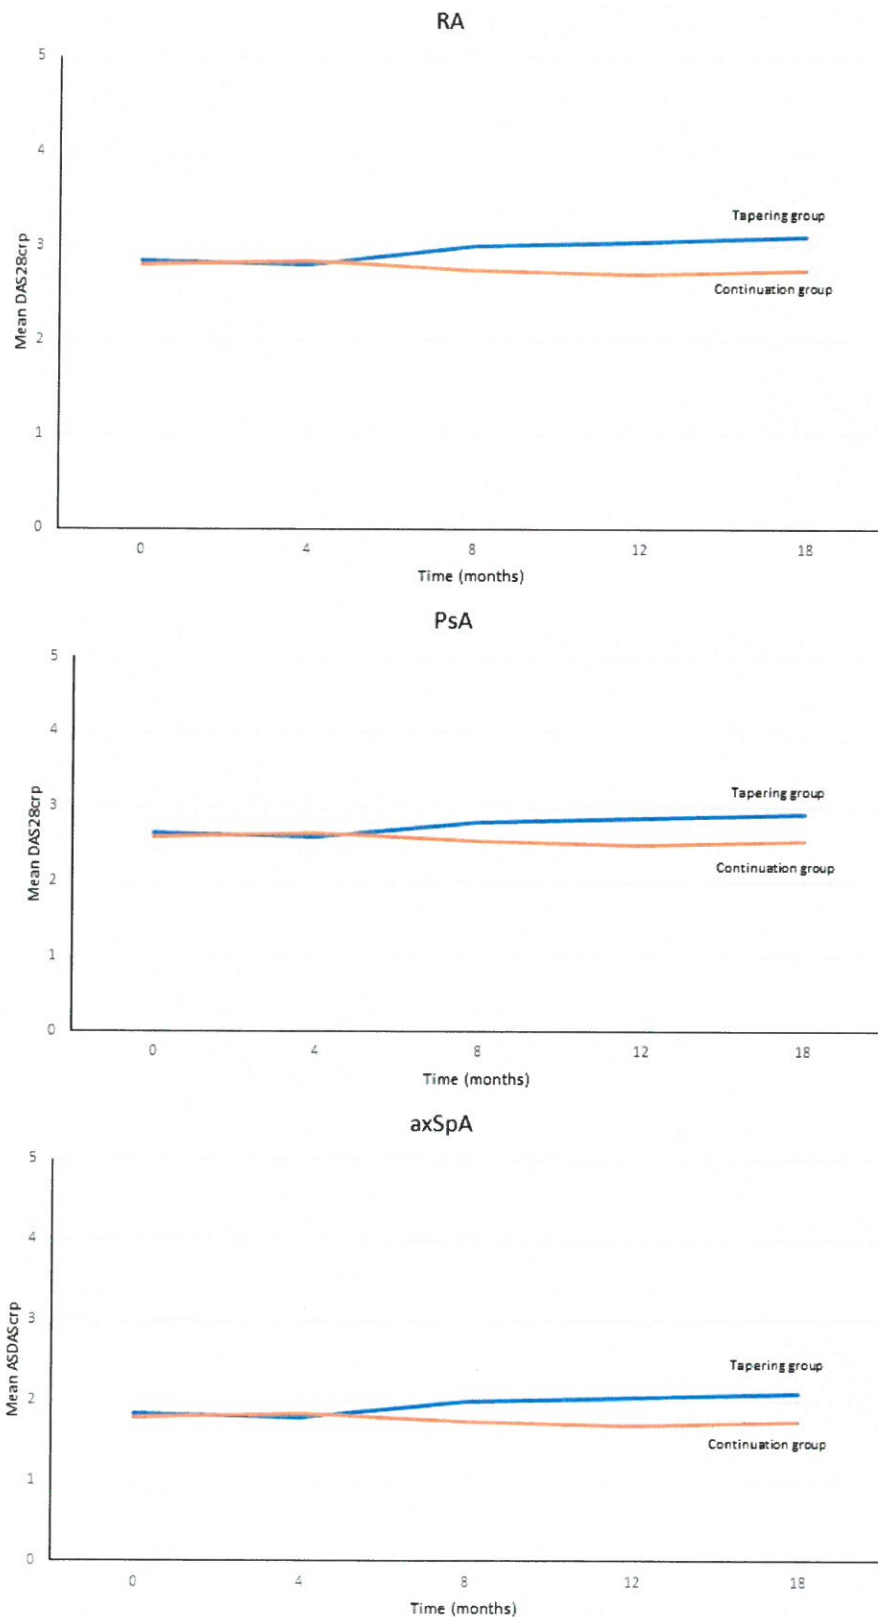

**Outline Table 2:** Comparison between groups at 18 months based on the ITT population using repeated-measures linear mixed-effects models

| Outcome                                                 | Tapering<br>group<br>N = | Continuation<br>group<br>N = | Difference<br>between groups,<br>(95%CI) | P-value |
|---------------------------------------------------------|--------------------------|------------------------------|------------------------------------------|---------|
| <b>Primary outcome:</b>                                 |                          |                              |                                          |         |
| bDMARDs reduced to 50% or less <sup>1</sup> , n (%)     |                          |                              |                                          |         |
| Disease activity score <sup>2</sup>                     |                          |                              |                                          |         |
| <b>Secondary outcomes:</b>                              |                          |                              |                                          |         |
| In remission <sup>3</sup> , n (%)                       |                          |                              |                                          |         |
| In low disease activity <sup>4</sup> , n (%)            |                          |                              |                                          |         |
| HAQ-DI (score: 0-3) <sup>5</sup>                        |                          |                              |                                          |         |
| Pain VAS (score: 0-100) <sup>5</sup>                    |                          |                              |                                          |         |
| Fatigue VAS (score: 0-100) <sup>5</sup>                 |                          |                              |                                          |         |
| Patient Global Health VAS (score: 0-100) <sup>5</sup>   |                          |                              |                                          |         |
| Short Form-36 PCS (score: 0-100) <sup>5</sup>           |                          |                              |                                          |         |
| Short Form-36 MCS (score: 0-100) <sup>5</sup>           |                          |                              |                                          |         |
| Physician Global Health VAS (score: 0-100) <sup>5</sup> |                          |                              |                                          |         |
| Tender joint count (score: 0-68) <sup>5</sup>           |                          |                              |                                          |         |
| Swollen joint count (score: 0-66) <sup>5</sup>          |                          |                              |                                          |         |
| CRP (mg/L) <sup>5</sup>                                 |                          |                              |                                          |         |

N: number, CI: confidence interval, VAS: Visual Analog Scale, PCS: physical component summary, MCS: mental component summary, CRP: C-reactive protein, mg: milligram, L:litre.

\*Dichotomous outcomes are analysed based on logistic regression analyses (18 months from baseline), missing data are imputed as trial failures.

<sup>1</sup>: Compared to baseline bDMARD dose

<sup>2</sup>: Assessed by Disease Activity Score (DAS)28crp for RA and PsA and Ankylosing Spondylitis Disease Activity Score (ASDAS)crp for axSpA

<sup>3</sup>: Evaluated as DAS28crp < 2.6 for RA and PsA and ASDAScrp < 1.3 for axSpA.

<sup>4</sup>: Evaluated as DAS28crp < 3.2 for RA and PsA and ASDAScrp < 2.1 for axSpA.

<sup>5</sup>: Change from baseline

**Outline Figure 3** Mock-up (simulated data visualisation (18)) of flare by trial arm visualised by a Kaplan Meier cumulative incidence curve.

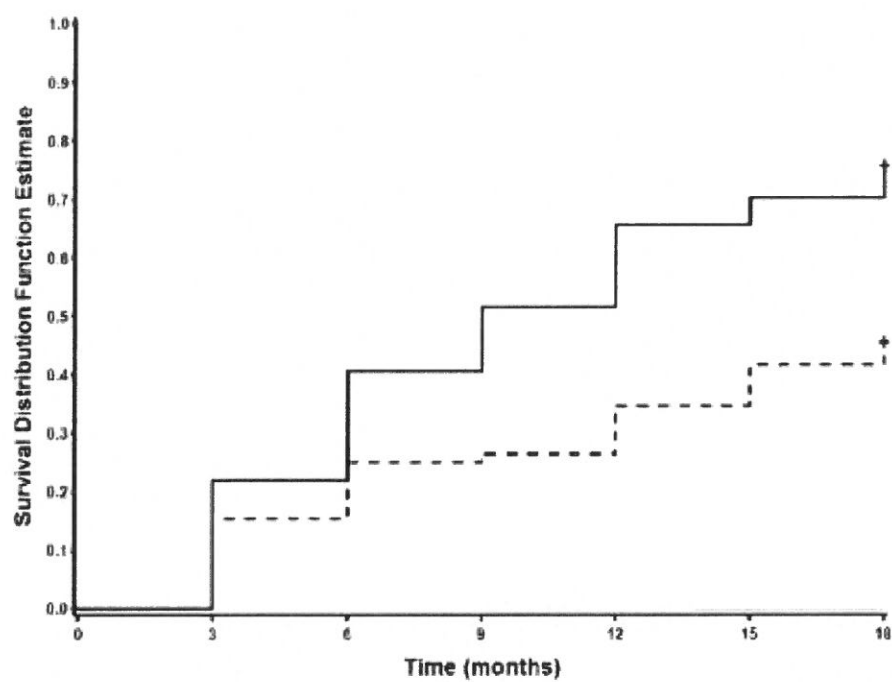



**Outline Table 3:** Safety and harm summary (data analysed “as observed” based on the original ITT population)

|                                                                                           | Tapering group<br>N = | Continuation<br>group<br>N = | Difference,<br>(95%CI) |
|-------------------------------------------------------------------------------------------|-----------------------|------------------------------|------------------------|
| <b>Flare:</b>                                                                             |                       |                              |                        |
| Fulfil flare criteria, n (%)                                                              |                       |                              |                        |
| Flare according to rheumatologist in patients<br>not fulfilling the flare criteria, n (%) |                       |                              |                        |
| bDMARDs dose escalation rescue therapy, n (%)                                             |                       |                              |                        |
| Glucocorticoid rescue therapy, n (%)                                                      |                       |                              |                        |
| Non-reversible flare after rescue therapy, n (%)                                          |                       |                              |                        |
| Switched to another biologic due to flare, n (%)                                          |                       |                              |                        |
| Non-reversible flare after switch, n (%)                                                  |                       |                              |                        |
| <b>Adverse events of particular interest:</b>                                             |                       |                              |                        |
| Infections, n (%)                                                                         |                       |                              |                        |
| Uveitis, n (%)                                                                            |                       |                              |                        |
| Psoriasis skin flare, n (%)                                                               |                       |                              |                        |
| Psoriasis nail flare, n (%)                                                               |                       |                              |                        |
| Flare in symptoms of IBD, n (%)                                                           |                       |                              |                        |
| Discontinued study drug due to any AE, n (%)                                              |                       |                              |                        |
| <b>Serious adverse events:</b>                                                            |                       |                              |                        |
| Serious infections, n (%)                                                                 |                       |                              |                        |
| Cardiovascular events, n (%)                                                              |                       |                              |                        |
| Malignancy, n (%)                                                                         |                       |                              |                        |
| Death, n (%)                                                                              |                       |                              |                        |

N: number, CI: confidence interval, bDMARD: biologic disease-modifying antirheumatic drug, IBD: inflammatory bowel disease, AE: adverse event.

**Outline Appendix Table 1: Baseline demographics and disease characteristics by diagnosis**

| Variable                                  | Tapering group | Continuation group | All |
|-------------------------------------------|----------------|--------------------|-----|
| <b>RA:</b>                                |                |                    |     |
| Female, n (%)                             |                |                    |     |
| Age (years)                               |                |                    |     |
| Disease duration from arthritis diagnosis |                |                    |     |
| RF positive, n (%)                        |                |                    |     |
| ACPA positive, n (%)                      |                |                    |     |
| Erosive, n (%)                            |                |                    |     |
| DAS28crp (0.96-9.4)                       |                |                    |     |
| CDAI (score 0-76)                         |                |                    |     |
| SDAI (score: 0-86)                        |                |                    |     |
| Concomitant csDMARDs, n (%)               |                |                    |     |
| Concomitant MTX, n (%)                    |                |                    |     |
| MTX dose, mg/week                         |                |                    |     |
| <b>PsA:</b>                               |                |                    |     |
| Female, n (%)                             |                |                    |     |
| Age (years)                               |                |                    |     |
| Disease duration from arthritis diagnosis |                |                    |     |
| SPARCC Enthesitis Index (score: 0-16)     |                |                    |     |
| Dactylitis by number (0-20)               |                |                    |     |
| PASI (score: 0-72)                        |                |                    |     |
| mNAPSI (score: 0-130)                     |                |                    |     |
| Erosive, n (%)                            |                |                    |     |
| DAS28crp (0.96-9.4)                       |                |                    |     |
| DAPSA (score: 0-164)                      |                |                    |     |
| In MDA, n (%)                             |                |                    |     |
| Concomitant csDMARDs, n (%)               |                |                    |     |
| Concomitant MTX, n (%)                    |                |                    |     |
| MTX dose, mg/week                         |                |                    |     |
| <b>axSpA:</b>                             |                |                    |     |
| Female, n (%)                             |                |                    |     |
| Age (years)                               |                |                    |     |
| Disease duration from arthritis diagnosis |                |                    |     |
| Ankylosing spondylitis, n (%)             |                |                    |     |
| HLA-B27 positive, n (%)                   |                |                    |     |
| BASFI (score: 0-100)                      |                |                    |     |
| SPARCC Enthesitis Index (score: 0-16)     |                |                    |     |
| Dactylitis by number (0-20)               |                |                    |     |
| PASI (score: 0-72)                        |                |                    |     |
| mNAPSI (score: 0-130)                     |                |                    |     |
| BASDAI (score: 0-100)                     |                |                    |     |
| ASDAS (score: 0.6-∞)                      |                |                    |     |
| BASMI (score: 0-100)                      |                |                    |     |
| Concomitant NSAIDs, n (%)                 |                |                    |     |

Values are means and standard deviation (SD) unless otherwise stated.

RA: rheumatoid arthritis, n: number, RF: Rheumatoid Factor, ACPA: Anti-Citrullinated Peptide Antibodies, DAS28crp: Disease Activity Score 28crp, CDAI: Clinical Disease Activity Index, SDAI: Simplified Disease Activity Index, PsA: psoriatic arthritis, SPARCC: Spondyloarthritis Research Consortium of Canada, PASI: Psoriasis Area Severity Index, mNAPSI: modified Nail Psoriasis Severity Index, DAPSA: Disease Activity index for Psoriatic Arthritis, MDA: Minimal Disease Activity in PsA, axSpA: axial spondyloarthritis, HLA-B27: Human leukocyte antigen subtype B27, BASFI: Bath Ankylosing Spondylitis Functional Index, BASDAI: Bath Ankylosing Spondylitis Disease Activity Index, ASDAS: Ankylosing Spondylitis Disease Activity Score, BASMI: Bath Ankylosing Spondylitis Metrology Index NSAIDs: Non-steroidal anti-inflammatory drugs.

**Outline Appendix Table 2:** Comparison between groups at 18 months based on the ITT population using non-responder imputation (Baseline Observation Carried Forward)

| Outcome                                                 | Tapering group<br>N = | Continuation group<br>N = | Difference between groups,<br>(95%CI) | P-value |
|---------------------------------------------------------|-----------------------|---------------------------|---------------------------------------|---------|
| <b>Primary outcome:</b>                                 |                       |                           |                                       |         |
| bDMARDs reduced to 50% or less <sup>1</sup> , n (%)     |                       |                           |                                       |         |
| Disease activity score <sup>2</sup>                     |                       |                           |                                       |         |
| <b>Secondary outcomes:</b>                              |                       |                           |                                       |         |
| In remission <sup>3</sup> , n (%)                       |                       |                           |                                       |         |
| In low disease activity <sup>4</sup> , n (%)            |                       |                           |                                       |         |
| HAQ-DI (score: 0-3) <sup>5</sup>                        |                       |                           |                                       |         |
| Pain VAS (score: 0-100) <sup>5</sup>                    |                       |                           |                                       |         |
| Fatigue VAS (score: 0-100) <sup>5</sup>                 |                       |                           |                                       |         |
| Patient Global Health VAS (score: 0-100) <sup>5</sup>   |                       |                           |                                       |         |
| Short Form-36 PCS (score: 0-100) <sup>5</sup>           |                       |                           |                                       |         |
| Short Form-36 MCS (score: 0-100) <sup>5</sup>           |                       |                           |                                       |         |
| Physician Global Health VAS (score: 0-100) <sup>5</sup> |                       |                           |                                       |         |
| Tender joint count (score: 0-68) <sup>5</sup>           |                       |                           |                                       |         |
| Swollen joint count (score: 0-66) <sup>5</sup>          |                       |                           |                                       |         |
| CRP (mg/L) <sup>5</sup>                                 |                       |                           |                                       |         |

N: number, CI: confidence interval, VAS: Visual Analog Scale, PCS: physical component summary, MCS: mental component summary, CRP: C-reactive protein, mg: milligram, L:litre.

\*Dichotomous outcomes are analysed based on logistic regression analyses (18 months from baseline), missing data are imputed as trial failures.

<sup>1</sup>: Compared to baseline bDMARD dose

<sup>2</sup>: Assessed by Disease Activity Score (DAS)28crp for RA and PsA and Ankylosing Spondylitis Disease Activity Score (ASDAS)crp for axSpA

<sup>3</sup>: Evaluated as DAS28crp < 2.6 for RA and PsA and ASDAScrp < 1.3 for axSpA.

<sup>4</sup>: Evaluated as DAS28crp < 3.2 for RA and PsA and ASDAScrp < 2.1 for axSpA.

<sup>5</sup>: Change from baseline

**Outline Appendix Table 3:** Comparison between groups at 18 months based on the *per protocol* population (i.e. no missing data)

| Outcome                                                 | Tapering<br>group<br>N = | Continuation<br>group<br>N = | Difference<br>between groups,<br>(95%CI) | P-value |
|---------------------------------------------------------|--------------------------|------------------------------|------------------------------------------|---------|
| <b>Primary outcome:</b>                                 |                          |                              |                                          |         |
| bDMARDs reduced to 50% or less <sup>1</sup> , n (%)     |                          |                              |                                          |         |
| Disease activity score <sup>2</sup>                     |                          |                              |                                          |         |
| <b>Secondary outcomes:</b>                              |                          |                              |                                          |         |
| In remission <sup>3</sup> , n (%)                       |                          |                              |                                          |         |
| In low disease activity <sup>4</sup> , n (%)            |                          |                              |                                          |         |
| HAQ-DI (score: 0-3) <sup>5</sup>                        |                          |                              |                                          |         |
| Pain VAS (score: 0-100) <sup>5</sup>                    |                          |                              |                                          |         |
| Fatigue VAS (score: 0-100) <sup>5</sup>                 |                          |                              |                                          |         |
| Patient Global Health VAS (score: 0-100) <sup>5</sup>   |                          |                              |                                          |         |
| Short Form-36 PCS (score: 0-100) <sup>5</sup>           |                          |                              |                                          |         |
| Short Form-36 MCS (score: 0-100) <sup>5</sup>           |                          |                              |                                          |         |
| Physician Global Health VAS (score: 0-100) <sup>5</sup> |                          |                              |                                          |         |
| Tender joint count (score: 0-68) <sup>5</sup>           |                          |                              |                                          |         |
| Swollen joint count (score: 0-66) <sup>5</sup>          |                          |                              |                                          |         |
| CRP (mg/L) <sup>5</sup>                                 |                          |                              |                                          |         |

N: number, CI: confidence interval, VAS: Visual Analog Scale, PCS: physical component summary, MCS: mental component summary, CRP: C-reactive protein, mg: milligram, L:litre.

\*Dichotomous outcomes are analysed based on logistic regression analyses (18 months from baseline), missing data are imputed as trial failures.

<sup>1</sup>: Compared to baseline bDMARD dose

<sup>2</sup>: Assessed by Disease Activity Score (DAS)28crp for RA and PsA and Ankylosing Spondylitis Disease Activity Score (ASDAS)crp for axSpA

<sup>3</sup>: Evaluated as DAS28crp < 2.6 for RA and PsA and ASDAScrp < 1.3 for axSpA.

<sup>4</sup>: Evaluated as DAS28crp < 3.2 for RA and PsA and ASDAScrp < 2.1 for axSpA.

<sup>5</sup>: Change from baseline

**Outline Appendix Table 4: Descriptive results reported by diagnosis**

| Outcome                                                                     | Tapering group<br>N = | Continuation group<br>N = |
|-----------------------------------------------------------------------------|-----------------------|---------------------------|
| <b><i>RA disease specific outcomes</i></b>                                  |                       |                           |
| HAQ-DI (score: 0-3) <sup>1</sup>                                            |                       |                           |
| Pain VAS (score 0-100) <sup>1</sup>                                         |                       |                           |
| Patient Global Health VAS (score 0-100) <sup>1</sup>                        |                       |                           |
| Tender joint count (0-68) <sup>1</sup>                                      |                       |                           |
| Swollen joint count (0-66) <sup>1</sup>                                     |                       |                           |
| Physician Global Health VAS (score 0-100) <sup>1</sup>                      |                       |                           |
| CRP (mg/L) <sup>1</sup>                                                     |                       |                           |
| DAS28crp (score: 0.96-9.4) <sup>1</sup>                                     |                       |                           |
| CDAI (score 0-76) <sup>1</sup>                                              |                       |                           |
| SDAI (score: 0-86) <sup>1</sup>                                             |                       |                           |
| <b><i>PsA disease specific outcomes</i></b>                                 |                       |                           |
| HAQ-DI (score: 0-3) <sup>1</sup>                                            |                       |                           |
| Pain VAS (score 0-100) <sup>1</sup>                                         |                       |                           |
| Patient Global Health VAS (score 0-100) <sup>1</sup>                        |                       |                           |
| Tender joint count (0-68) <sup>1</sup>                                      |                       |                           |
| Swollen joint count (0-66) <sup>1</sup>                                     |                       |                           |
| Physician Global Health VAS (score 0-100) <sup>1</sup>                      |                       |                           |
| CRP (mg/L) <sup>1</sup>                                                     |                       |                           |
| SPARCC Enthesitis Index (score: 0-16) <sup>1</sup>                          |                       |                           |
| Dactylitis by number (0-20) <sup>1</sup>                                    |                       |                           |
| PASI (score: 0-72) <sup>1</sup>                                             |                       |                           |
| mNAPSI (score: 0-130) <sup>1</sup>                                          |                       |                           |
| DAS28crp (score: 0.96-9.4) <sup>1</sup>                                     |                       |                           |
| DAPSA (score: 0-164) <sup>1</sup>                                           |                       |                           |
| In MDA, n (%) <sup>1</sup>                                                  |                       |                           |
| <b><i>axSpA disease specific outcomes</i></b>                               |                       |                           |
| HAQ-DI (score: 0-3) <sup>1</sup>                                            |                       |                           |
| Pain VAS (score 0-100) <sup>1</sup>                                         |                       |                           |
| Patient Global Health VAS (score 0-100) <sup>1</sup>                        |                       |                           |
| Backpain i.e. BASDAI question 2 (score: 0-100) <sup>1</sup>                 |                       |                           |
| Morning stiffness i.e. BASDAI question 5 (score: 0-100) <sup>1</sup>        |                       |                           |
| Peripheral pain/swelling i.e. BASDAI question 3 (score: 0-100) <sup>1</sup> |                       |                           |
| Tender joint count (0-68) <sup>1</sup>                                      |                       |                           |
| Swollen joint count (0-66) <sup>1</sup>                                     |                       |                           |
| Physician Global Health VAS (score 0-100) <sup>1</sup>                      |                       |                           |
| CRP (mg/L) <sup>1</sup>                                                     |                       |                           |
| SPARCC Enthesitis Index (score: 0-16) <sup>1</sup>                          |                       |                           |
| Dactylitis by number (0-20) <sup>1</sup>                                    |                       |                           |
| PASI (score: 0-72) <sup>1</sup>                                             |                       |                           |
| mNAPSI (score: 0-130) <sup>1</sup>                                          |                       |                           |
| ASDAS (score: 0.6-∞) <sup>1</sup>                                           |                       |                           |
| BASDAI (score 0-100) <sup>1</sup>                                           |                       |                           |

N: number, CI: confidence interval, RA: rheumatoid arthritis, HAQ-DI: Health Assessment Questionnaire Disability Index, VAS: Visual Analog Scale, CRP: C-Reactive Protein, mg: milligram, L: litre, DAS28crp: Disease Activity Score 28crp, CDAI: Clinical Disease Activity Index, SDAI: Simplified Disease Activity Index, PsA: psoriatic arthritis, SPARCC: Spondyloarthritis Research Consortium of Canada, PASI: Psoriasis Area Severity Index, mNAPSI: modified Nail Psoriasis Severity Index, DAPSA: Disease Activity index for Psoriatic Arthritis, MDA: Minimal Disease Activity in PsA, axSpA: axial spondyloarthritis, BASDAI: Bath Ankylosing Spondylitis Disease Activity Index, ASDAS: Ankylosing Spondylitis Disease Activity Score, BASFI: Bath Ankylosing Spondylitis Functional Index, BASMI: Bath Ankylosing Spondylitis Metrology Index.

<sup>1</sup>: Change from baseline
